# Supplementary material
Source: publisher figshare collection journal article supplement (https://gsajournals.figshare.com/ndownloader/files/20276250)
Supplement: Supplementary file 1 [file 20276250]

## Sheet: I,II ABA-responsive
Gene	DE in groups I,II	log2FC	p-value	FDR	ABA primary targets (* ABA-responsive in literature)	ABA regulators	Secondary targets (GRN)	Gene name	ABA % mCHH increase in Mop1 wildtype	Reference
Zm00001d011495	￪	2.18432	0.000151813	0.013769	*✓	✓	✓	prh20		Wang, YG et al. 2018. Plant Mol Biol pp.doi: 10.1007/s11103-017-0692-7
Zm00001d018178	￪	1.98038	3e-06	0.00181063	*✓	✓	✓	bzip4		Ma, HZ et al. 2018. Plant Physiol pp.doi: 10.1104/pp.18.00436
Zm00001d026447	￪	1.37963	0.000505586	0.0254335	*✓	✓	✓	ereb156		Huang, HH et al. 2016. Sci. Rep. Article number: 27590
Zm00001d038846	￪	1.96258	9.22e-05	0.0108018	*✓	✓	✓	prh12		Wang, YG et al. 2018. Plant Mol Biol pp.doi: 10.1007/s11103-017-0692-7
Zm00001d043992	￪	1.36388	0.000613776	0.0277146	*✓	✓	✓	bzip1		Nieva, C, et al. 2005. Plant Mol Biol. 58:899-914
Zm00001d044301	￪	2.04651	0.00130295	0.0421663	*✓	✓	✓	prh13		Wang, YG et al. 2018. Plant Mol Biol pp.doi: 10.1007/s11103-017-0692-7
Zm00001d000002	￪	1.52493	0.000127462	0.012643	*✓		✓	du1		Huang, HH et al. 2016. Sci. Rep. Article number: 27590
Zm00001d013494	￪	4.83604	3.2e-05	0.00582945	*✓		✓	ole3		Williams, BA; Tsang, A. 1994. Dev Genet 15:415-424
Zm00001d017762	￪	1.85565	3.2e-05	0.00582945	*✓		✓	abh1		Vallabhaneni, R; Wurtzel, E. 2010. Arch Biochem Biophys. 504:112-7
Zm00001d020717	￪	3.14169	1.24e-06	0.00105977	*✓		✓	abh4		Vallabhaneni, R; Wurtzel, E. 2010. Arch Biochem Biophys. 504:112-7
Zm00001d023529	￪	1.60918	0.000162278	0.014083	*✓		✓	aasr1		Zhang, J et al. 2019. Int J Mol Sci 20:133
Zm00001d033447	￪	4.62993	2.41e-06	0.00158713	*✓		✓	glb1		Liu, S et al. 1998. Plant Cell Rep 17:650-655
Zm00001d037894	￪	3.0664	2.04e-05	0.00451131	*✓		✓	dhn1		Busk, P et al. 1997. Plant J 11:1285-1295
Zm00001d038730	￪	1.38078	0.000627526	0.028038	*✓		✓	cbl4		Tai, F, et al. 2016. Plant Cell, Tissue and Organ Culture (PCTOC). 124:459-469
Zm00001d011132	￪	2.20783	2.15e-05	0.00468808	*✓			prh18
Zm00001d033931	￪	1.40741	0.000239435	0.0175991	*✓			adh1		Niu, X. et al., 2002. Plant Cell 10:2565-2575
Zm00001d005609	￪	1.84922	3.86e-05	0.00647743	✓	✓	✓	prh7
Zm00001d006813	￪	2.74374	0.000485736	0.0251344	✓	✓	✓	cadtfr6
Zm00001d009626	￪	1.98962	5.08e-06	0.00255518	✓	✓	✓	prh9
Zm00001d012401	￪	2.23657	3.79e-06	0.00219365	✓	✓	✓	prh4
Zm00001d017422	￪	3.19599	2.15e-07	0.000507232	✓	✓	✓	hb41
Zm00001d025055	￪	3.46839	1.92e-05	0.00444083	✓	✓	✓	prh11
Zm00001d025964	￪	2.08526	0.00137298	0.0432987	✓	✓	✓	hb70
Zm00001d035134	￪	1.5587	0.000127402	0.012643	✓	✓	✓
Zm00001d039065	￪	1.73638	0.00011009	0.0120133	✓	✓	✓	gbf1
Zm00001d042886	￪	2.69186	1.04e-07	0.000397944	✓	✓	✓	prh3
Zm00001d045204	￪	1.75826	2.51e-05	0.00512719	✓	✓	✓	ereb122
Zm00001d046299	￪	1.201	0.000132487	0.0128267	✓	✓	✓	hsftf28
Zm00001d046632	￪	1.04472	0.00047162	0.0248714	✓	✓	✓	myb112
Zm00001d047995	￪	1.05226	0.00154714	0.0461958	✓	✓	✓	hb62
Zm00001d053195	￪	2.45795	0.00012208	0.0125042	✓	✓	✓	ereb111
Zm00001d007876	￪	5.79466	9.52e-05	0.0109777	✓		✓	nced4
Zm00001d008983	￪	3.89719	9.88e-07	0.000992563	✓		✓
Zm00001d010652	￪	1.84774	6.37e-06	0.00261093	✓		✓
Zm00001d012068	￪	1.90794	0.000303537	0.0196172	✓		✓	psei10
Zm00001d014007	￪	1.24049	0.000250159	0.0180344	✓		✓
Zm00001d014089	￪	1.80807	0.000411776	0.0232727	✓		✓
Zm00001d014481	￪	1.52166	0.000727636	0.0306298	✓		✓
Zm00001d016982	￪	1.20784	0.000596222	0.0275477	✓		✓
Zm00001d019163	￪	1.7486	0.00138162	0.0433621	✓		✓	aga1
Zm00001d021059	￪	1.485	0.000524861	0.0260794	✓		✓	sacd8
Zm00001d022069	￪	2.51557	7.73e-08	0.000397944	✓		✓
Zm00001d022376	￪	7.63583	0.000485213	0.0251344	✓		✓
Zm00001d025199	￪	0.986409	0.000430606	0.0238251	✓		✓
Zm00001d025229	￪	2.63577	0.000313046	0.0199142	✓		✓
Zm00001d026126	￪	1.38463	0.000535563	0.0261101	✓		✓
Zm00001d026414	￪	1.75038	2.3e-05	0.00483855	✓		✓
Zm00001d027341	￪	1.31724	0.000368789	0.0218897	✓		✓
Zm00001d027520	￪	1.25629	0.000975276	0.0355662	✓		✓	expa6
Zm00001d029975	￪	1.35585	2.93e-05	0.00565991	✓		✓	snrkII3
Zm00001d031290	￪	1.19575	0.000489437	0.0251344	✓		✓	xer3
Zm00001d031555	￪	1.00487	0.000916607	0.0345001	✓		✓
Zm00001d035000	￪	1.82624	3.05e-05	0.00581513	✓		✓
Zm00001d037724	￪	2.46956	0.00010102	0.0114189	✓		✓	ga2ox6
Zm00001d037730	￪	4.33608	0.000719029	0.0303576	✓		✓
Zm00001d038526	￪	1.5756	3.92e-05	0.00653594	✓		✓
Zm00001d038695	￪	1.8739	0.000184128	0.0155155	✓		✓	ga2ox7
Zm00001d038860	￪	0.984176	0.000905346	0.0342944	✓		✓
Zm00001d040613	￪	2.7229	9.79e-07	0.000992563	✓		✓
Zm00001d041154	￪	1.08606	0.00170426	0.0484017	✓		✓
Zm00001d043180	￪	1.98841	0.00155169	0.0461958	✓		✓
Zm00001d043263	￪	1.4665	0.00143056	0.044279	✓		✓	dgk7
Zm00001d046210	￪	1.00482	0.000843654	0.0330154	✓		✓
Zm00001d047290	￪	1.47789	9.13e-05	0.0107521	✓		✓
Zm00001d048201	￪	1.44786	0.000138769	0.0130369	✓		✓
Zm00001d048868	￪	1.29208	0.000310164	0.0198198	✓		✓
Zm00001d050308	￪	1.82388	0.000958583	0.0353131	✓		✓
Zm00001d050347	￪	1.53979	1.29e-05	0.00356173	✓		✓
Zm00001d053049	￪	1.70349	7.3e-06	0.00270465	✓		✓
Zm00001d053817	￪	1.22109	0.00171967	0.0486446	✓		✓
Zm00001d002952	￪	8.14863	2.22e-05	0.00473976	✓
Zm00001d006713	￪	2.67336	0.000655067	0.0287153	✓
Zm00001d012867	￪	2.05478	0.00179008	0.0496948	✓
Zm00001d014625	￪	1.05872	0.000155122	0.01384	✓
Zm00001d019629	￪	1.64895	9.25e-05	0.0108018	✓
Zm00001d022211	￪	2.73908	4.81e-05	0.00760023	✓
Zm00001d023168	￪	1.44042	0.000741457	0.0307833	✓
Zm00001d023443	￪	3.38364	1.7e-07	0.000481339	✓
Zm00001d023800	￪	2.22123	6.04e-06	0.00258325	✓
Zm00001d026182	￪	0.974881	0.000608575	0.027631	✓
Zm00001d027370	￪	1.81565	0.000127118	0.012643	✓
Zm00001d028574	￪	2.34384	7.48e-05	0.00973186	✓
Zm00001d030086	￪	1.74406	0.000285916	0.0190871	✓
Zm00001d032069	￪	1.16969	0.00125788	0.0412108	✓
Zm00001d032610	￪	7.57243	0.00156232	0.0463646	✓			tip3b
Zm00001d042279	￪	1.02928	0.00038198	0.0221563	✓
Zm00001d043536	￪	1.43232	5.99e-05	0.00853827	✓
Zm00001d046952	￪	1.3343	0.000119126	0.0123352	✓
Zm00001d049049	￪	1.25159	0.00132275	0.0423438	✓
Zm00001d049660	￪	1.69777	2.11e-06	0.00142552	✓
Zm00001d050125	￪	1.21616	0.000290041	0.0191819	✓
Zm00001d052268	￪	1.53457	5.09e-05	0.00764892	✓			gol1
Zm00001d045883	￪	2.53044	0.000856261	0.0333826			*✓	nhx3		Ma, HZ et al. 2018. Plant Physiol pp.doi: 10.1104/pp.18.00436
Zm00001d053293	￪	1.8765	5.15e-05	0.00764892			*✓	cbl8		Zhang, F et al. 2016. Plant Sci 253:118-129
Zm00001d000071	￪	1.21782	0.000512103	0.0256703			✓
Zm00001d000224	￪	1.36391	0.000415291	0.0234247			✓
Zm00001d001936	￪	1.94101	0.000558135	0.0267039			✓	glk16
Zm00001d001996	￪	2.82651	4.49e-05	0.00728258			✓
Zm00001d002020	￪	1.25584	2.53e-05	0.005136			✓
Zm00001d003213	￪	1.31235	0.000609066	0.027631			✓
Zm00001d003272	￪	2.00759	0.000125541	0.012643			✓
Zm00001d003275	￪	1.22051	0.000339904	0.0209192			✓
Zm00001d003287	￪	1.49068	0.000131959	0.0128217			✓	nrt4
Zm00001d003457	￪	1.21329	8.97e-05	0.010659			✓
Zm00001d003757	￪	2.03446	6.54e-05	0.00914678			✓
Zm00001d003833	￪	1.01558	0.000668544	0.028863			✓
Zm00001d004095	￪	1.34864	0.000628732	0.0280478			✓	bhlh144
Zm00001d004171	￪	3.70234	0.00016115	0.0140682			✓
Zm00001d004442	￪	3.63921	6.08e-06	0.00258325			✓
Zm00001d004564	￪	1.57321	0.000112865	0.0121132			✓
Zm00001d004624	￪	2.47917	9.95e-07	0.000992563			✓
Zm00001d004698	￪	0.967979	0.00129108	0.0420012			✓
Zm00001d005018	￪	1.0072	0.00158886	0.0467626			✓
Zm00001d005622	￪	1.02335	0.00165109	0.047752			✓	wrky38
Zm00001d005748	￪	3.58723	1.09e-05	0.00318603			✓
Zm00001d005885	￪	0.956401	0.00174172	0.0490727			✓
Zm00001d006158	￪	1.35523	1.52e-05	0.00385677			✓
Zm00001d006330	￪	0.981627	0.00117047	0.0394401			✓
Zm00001d006682	￪	1.24898	4.89e-05	0.00762177			✓
Zm00001d006688	￪	1.4028	3.77e-05	0.00637791			✓
Zm00001d007097	￪	1.32815	5.01e-05	0.00764892			✓
Zm00001d007185	￪	0.952304	0.000335345	0.0207444			✓
Zm00001d007231	￪	1.11326	0.00131665	0.0423438			✓
Zm00001d007285	￪	1.74609	0.00174661	0.0490949			✓
Zm00001d007311	￪	1.26047	0.000128535	0.012643			✓	bhlh41
Zm00001d007395	￪	2.73745	0.000218702	0.0169191			✓
Zm00001d007420	￪	1.5854	0.000949147	0.0351012			✓
Zm00001d007606	￪	2.49238	2.93e-05	0.00565991			✓
Zm00001d007820	￪	1.59154	0.000250442	0.0180344			✓
Zm00001d008208	￪	2.11095	0.000113149	0.0121132			✓
Zm00001d008730	￪	1.1765	0.00026184	0.0182382			✓
Zm00001d008869	￪	1.60969	0.000617682	0.0277732			✓	hb52
Zm00001d008919	￪	1.3455	0.000185592	0.0155155			✓	tcptf24
Zm00001d009382	￪	2.20825	0.000964503	0.0353131			✓
Zm00001d009497	￪	1.34994	0.000662831	0.0288066			✓
Zm00001d010410	￪	1.35451	0.000344769	0.020946			✓	tip4b
Zm00001d010493	￪	1.13596	3.63e-05	0.00635802			✓
Zm00001d010586	￪	1.37515	0.00165045	0.047752			✓
Zm00001d010698	￪	1.17868	0.000221311	0.0169191			✓
Zm00001d010961	￪	1.19118	0.000221835	0.0169191			✓
Zm00001d011269	￪	1.62621	1.5e-06	0.00120736			✓
Zm00001d011700	￪	1.12832	0.000136337	0.0128941			✓
Zm00001d012069	￪	1.46888	0.000150118	0.0137505			✓
Zm00001d012159	￪	1.38591	0.000921912	0.034561			✓
Zm00001d012313	￪	1.79279	4.96e-05	0.00764892			✓
Zm00001d012338	￪	1.07612	7.06e-05	0.00956336			✓
Zm00001d012381	￪	1.21939	0.00158871	0.0467626			✓
Zm00001d012391	￪	1.45766	0.000157271	0.0139877			✓
Zm00001d012591	￪	1.7333	6.44e-06	0.00261093			✓
Zm00001d013390	￪	1.22707	0.000649451	0.0286122			✓
Zm00001d013725	￪	1.05731	0.00115903	0.039241			✓	ga20ox4
Zm00001d014178	￪	1.16163	0.000342753	0.020946			✓
Zm00001d014467	￪	1.57619	0.000527291	0.0261087			✓
Zm00001d014617	￪	2.87629	7.58e-06	0.00271835			✓	xet1
Zm00001d014744	￪	2.22705	1.97e-05	0.00446142			✓
Zm00001d015777	￪	1.10408	0.000529328	0.0261101			✓
Zm00001d015977	￪	1.5945	0.000298407	0.0194184			✓
Zm00001d016255	￪	3.50176	5.85e-06	0.00258325			✓	hsftf18
Zm00001d016570	￪	1.78497	0.000180089	0.0153438			✓
Zm00001d016662	￪	1.04284	0.000465775	0.0247805			✓
Zm00001d016764	￪	1.49034	8.64e-05	0.0105192			✓
Zm00001d017065	￪	2.43048	1.27e-06	0.00105977			✓
Zm00001d017453	￪	3.72996	3.72e-05	0.00637645			✓
Zm00001d017801	￪	1.07017	0.000961578	0.0353131			✓
Zm00001d017968	￪	1.81957	0.000262689	0.0182382			✓
Zm00001d017989	￪	2.10159	3.78e-05	0.00637791			✓
Zm00001d018076	￪	1.00201	0.000517674	0.0258178			✓
Zm00001d018122	￪	1.47504	0.000191031	0.0155947			✓
Zm00001d019446	￪	3.30084	0.000441264	0.024169			✓
Zm00001d019712	￪	1.01491	0.000295632	0.0193711			✓	myb153
Zm00001d020133	￪	1.64442	3.4e-07	0.000575194			✓
Zm00001d020332	￪	3.25169	4e-07	0.000630229			✓
Zm00001d020348	￪	0.963032	0.000577548	0.027052			✓
Zm00001d020408	￪	1.41317	0.00159888	0.0469601			✓	myb159
Zm00001d020457	￪	1.27651	0.000200037	0.0161694			✓	myb162
Zm00001d020496	￪	1.27331	0.000540373	0.0262525			✓
Zm00001d020612	￪	1.40653	7.15e-05	0.00956336			✓
Zm00001d020620	￪	2.42334	0.00100378	0.0362331			✓
Zm00001d020627	￪	1.27529	0.000118581	0.0123308			✓
Zm00001d020636	￪	1.26487	0.000757427	0.0310097			✓	ccp2
Zm00001d020673	￪	1.27512	0.00153834	0.0459914			✓
Zm00001d020686	￪	1.3453	2.49e-05	0.00511826			✓	acco2
Zm00001d020828	￪	1.49017	7.11e-07	0.000960449			✓
Zm00001d020969	￪	1.16492	0.00161555	0.0473029			✓
Zm00001d021303	￪	1.09046	0.000873912	0.0338724			✓
Zm00001d021573	￪	1.92747	0.000205541	0.0164898			✓	sbp29
Zm00001d021803	￪	1.10453	0.000993415	0.0359964			✓
Zm00001d021900	￪	1.15155	0.000286846	0.0191042			✓
Zm00001d021978	￪	0.99937	0.000281546	0.0189739			✓
Zm00001d022349	￪	3.8209	0.00180221	0.0498851			✓
Zm00001d023522	￪	1.80991	0.000173869	0.0149034			✓
Zm00001d023979	￪	1.23777	0.000126199	0.012643			✓	dgk5
Zm00001d024572	￪	1.25919	0.000274658	0.0187322			✓
Zm00001d024778	￪	1.04707	0.00143112	0.044279			✓	nac1
Zm00001d025360	￪	1.60163	0.000800848	0.0321381			✓
Zm00001d025474	￪	1.11158	7.35e-05	0.00969903			✓
Zm00001d025580	￪	1.46683	0.000751772	0.030912			✓	serk1
Zm00001d026253	￪	1.24244	0.000216536	0.0169191			✓
Zm00001d026480	￪	1.11929	0.00150212	0.0454648			✓	iaa44
Zm00001d026635	￪	1.67087	0.00048903	0.0251344			✓	alla1
Zm00001d026670	￪	1.79093	0.000214221	0.016825			✓
Zm00001d027256	￪	1.81735	0.000131028	0.012775			✓
Zm00001d027593	￪	1.24152	0.00066836	0.028863			✓	prc3
Zm00001d027749	￪	1.19749	0.00020592	0.0164898			✓	sfp4
Zm00001d027755	￪	1.96672	3.45e-07	0.000575194			✓
Zm00001d027987	￪	1.53501	0.00167741	0.0481897			✓	bhlh160
Zm00001d028092	￪	2.52408	5.14e-05	0.00764892			✓
Zm00001d028120	￪	2.04056	0.000231289	0.0173269			✓
Zm00001d028693	￪	1.13545	7.85e-05	0.00999129			✓	saf1
Zm00001d028778	￪	1.34995	3.21e-05	0.00582945			✓
Zm00001d028809	￪	1.17349	0.00174669	0.0490949			✓
Zm00001d029091	￪	2.17039	5.87e-05	0.00841113			✓	sus2
Zm00001d029209	￪	1.11375	0.000148209	0.0136526			✓
Zm00001d029366	￪	2.27677	0.00163728	0.0475261			✓
Zm00001d029654	￪	1.99081	8.39e-05	0.0103027			✓	tre1
Zm00001d029721	￪	1.15093	0.000121269	0.0124661			✓	asg3
Zm00001d029835	￪	2.42341	2.48e-06	0.0015986			✓
Zm00001d029934	￪	2.21002	1.06e-07	0.000397944			✓	hb78
Zm00001d029988	￪	1.94773	0.000117257	0.0122761			✓
Zm00001d030498	￪	2.82156	3.94e-05	0.00653594			✓
Zm00001d030550	￪	1.65852	0.000184237	0.0155155			✓
Zm00001d030577	￪	1.37035	0.00136495	0.043172			✓	bzip45
Zm00001d030860	￪	1.0329	0.00132213	0.0423438			✓
Zm00001d031267	￪	1.17682	0.000144762	0.0134662			✓
Zm00001d031749	￪	2.74352	6.61e-07	0.000937069			✓
Zm00001d031790	￪	0.977004	0.000309384	0.0198146			✓	bzip49
Zm00001d032079	￪	1.4286	0.000235872	0.017473			✓
Zm00001d032116	￪	2.12199	0.000233109	0.017359			✓
Zm00001d032138	￪	3.94885	1.01e-07	0.000397944			✓
Zm00001d032144	￪	2.21938	0.00042885	0.0238251			✓	ereb60
Zm00001d032253	￪	2.57418	1.65e-05	0.00406436			✓
Zm00001d032461	￪	1.23071	0.000615401	0.0277146			✓	tls1
Zm00001d033231	￪	2.60374	4.86e-08	0.000397944			✓
Zm00001d033369	￪	2.37651	4.61e-06	0.00246779			✓
Zm00001d033612	￪	7.69057	1.93e-05	0.00444083			✓	ole4
Zm00001d033943	￪	2.50166	0.000614871	0.0277146			✓
Zm00001d034027	￪	1.52099	0.000111694	0.0121132			✓
Zm00001d034191	￪	1.04044	0.000575673	0.027052			✓
Zm00001d034558	￪	1.38948	8.1e-05	0.0101193			✓
Zm00001d034650	￪	1.12207	0.000454223	0.0244895			✓
Zm00001d034651	￪	1.13137	0.000626847	0.028038			✓	dof27
Zm00001d034978	￪	1.31017	0.000185661	0.0155155			✓
Zm00001d035079	￪	2.22828	0.000107729	0.011893			✓	zar5
Zm00001d035447	￪	1.15531	0.000255093	0.0181166			✓
Zm00001d035501	￪	1.1173	0.000742131	0.0307833			✓
Zm00001d036280	￪	2.26916	0.000472891	0.0248921			✓
Zm00001d036499	￪	2.20508	0.00126599	0.041381			✓
Zm00001d036533	￪	2.08021	0.00100178	0.0362069			✓
Zm00001d036683	￪	2.66853	0.00025326	0.0180678			✓
Zm00001d036700	￪	1.33149	0.000843235	0.0330154			✓
Zm00001d037057	￪	1.12676	0.000134088	0.0128941			✓
Zm00001d037453	￪	2.14816	7.89e-06	0.00276305			✓
Zm00001d037769	￪	2.08248	5.06e-05	0.00764892			✓	c3h39
Zm00001d038146	￪	1.33575	0.000189875	0.0155698			✓
Zm00001d038304	￪	1.28518	1.92e-05	0.00444083			✓
Zm00001d038753	￪	1.00549	0.000927461	0.0346692			✓
Zm00001d038911	￪	2.95983	8.5e-09	0.000241118			✓
Zm00001d038913	￪	1.87086	6.77e-05	0.00932869			✓	ltp1
Zm00001d038991	￪	1.24523	0.000223477	0.0169986			✓
Zm00001d039492	￪	1.36822	0.000220749	0.0169191			✓
Zm00001d039735	￪	3.0112	7.73e-05	0.00988184			✓
Zm00001d039919	￪	2.28958	1.27e-05	0.00355866			✓
Zm00001d040056	￪	1.00042	1.35e-05	0.00362489			✓
Zm00001d040113	￪	8.08875	0.00101256	0.036503			✓	pebp10
Zm00001d040190	￪	1.52663	1.24e-05	0.00352107			✓
Zm00001d040627	￪	1.22747	0.000217987	0.0169191			✓	nc1
Zm00001d040807	￪	1.31628	0.00111999	0.0386103			✓
Zm00001d041387	￪	1.04827	0.00114967	0.0391108			✓
Zm00001d042013	￪	1.41608	0.00120563	0.0401011			✓
Zm00001d042148	￪	1.90091	1.95e-05	0.00446142			✓	cko2
Zm00001d042480	￪	1.07705	3.58e-05	0.00634228			✓
Zm00001d042598	￪	1.12427	0.000407387	0.0231912			✓
Zm00001d042721	￪	1.01335	0.00130707	0.0421663			✓	bzip95
Zm00001d042826	￪	1.28603	0.00118564	0.039737			✓
Zm00001d042862	￪	2.00323	2.82e-06	0.00173735			✓
Zm00001d042932	￪	1.06805	0.000706911	0.0299351			✓
Zm00001d042940	￪	1.4654	0.000547352	0.0264557			✓
Zm00001d043117	￪	1.03063	0.000490328	0.0251344			✓	bzip102
Zm00001d043205	￪	1.23703	4.82e-05	0.00760023			✓	ereb147
Zm00001d043361	￪	1.45674	0.000440134	0.0241538			✓
Zm00001d043549	￪	1.82009	0.000363548	0.0217149			✓
Zm00001d043596	￪	1.7859	0.000469023	0.0247805			✓
Zm00001d043612	￪	1.34725	0.000135792	0.0128941			✓
Zm00001d043614	￪	1.00533	0.00133675	0.0425182			✓	sfp6
Zm00001d043709	￪	3.7871	1.68e-05	0.00410063			✓
Zm00001d044093	￪	0.951679	0.000832126	0.0327536			✓
Zm00001d044109	￪	1.30931	0.000257331	0.0181166			✓
Zm00001d044120	￪	1.54422	0.000494319	0.0251792			✓
Zm00001d044124	￪	2.01818	0.00167692	0.0481897			✓	yz1
Zm00001d044142	￪	3.50785	1.12e-07	0.000397944			✓	csu845
Zm00001d044159	￪	1.31084	4.17e-05	0.00688497			✓	cyp11
Zm00001d044748	￪	1.90202	0.000140272	0.0130915			✓
Zm00001d044864	￪	2.41327	0.00044552	0.0242649			✓
Zm00001d046073	￪	1.23453	7.32e-05	0.00969903			✓
Zm00001d046281	￪	2.77731	2.8e-07	0.000575194			✓
Zm00001d046593	￪	1.05837	3.69e-05	0.00637645			✓	acp1
Zm00001d046644	￪	1.46495	6.63e-05	0.00921782			✓
Zm00001d047060	￪	3.76556	2.46e-05	0.00510309			✓
Zm00001d047259	￪	5.09131	4.12e-06	0.00233982			✓
Zm00001d047260	￪	2.25325	6.19e-06	0.00258325			✓
Zm00001d047261	￪	11.4643	0.000569636	0.0268914			✓
Zm00001d047547	￪	2.66283	7.51e-06	0.00271835			✓
Zm00001d047685	￪	1.67007	2.08e-05	0.00456931			✓
Zm00001d047765	￪	1.4238	6.29e-05	0.00883527			✓
Zm00001d047814	￪	1.58929	9.04e-06	0.0029152			✓
Zm00001d047981	￪	1.40372	0.0017847	0.049594			✓
Zm00001d047994	￪	2.00412	1.63e-06	0.00120736			✓
Zm00001d048142	￪	2.30498	9.85e-05	0.0112276			✓
Zm00001d048185	￪	1.48106	0.000382651	0.0221563			✓
Zm00001d048220	￪	0.98856	0.0013557	0.0429284			✓
Zm00001d048521	￪	1.29722	0.000186598	0.0155155			✓
Zm00001d048621	￪	1.14528	0.000424558	0.0237585			✓
Zm00001d048694	￪	7.50265	2.57e-05	0.00517065			✓
Zm00001d048695	￪	1.47758	1.21e-05	0.00346809			✓
Zm00001d048789	￪	1.32324	0.000467913	0.0247805			✓
Zm00001d048925	￪	1.40746	0.000115679	0.0121746			✓
Zm00001d048991	￪	3.09175	0.00083984	0.03298			✓	ereb106
Zm00001d049218	￪	1.71575	8.38e-05	0.0103027			✓
Zm00001d049926	￪	2.30935	8.69e-06	0.0028683			✓
Zm00001d049987	￪	5.81488	0.00167626	0.0481897			✓
Zm00001d050055	￪	4.82071	6.88e-06	0.00264956			✓
Zm00001d050323	￪	1.25546	0.000343698	0.020946			✓
Zm00001d050339	￪	1.21901	0.000261656	0.0182382			✓
Zm00001d051194	￪	1.67179	0.000503265	0.0253713			✓
Zm00001d051313	￪	1.12213	0.00171015	0.0484235			✓
Zm00001d051415	￪	1.89165	3.15e-05	0.00582945			✓
Zm00001d051584	￪	1.42514	1.14e-06	0.00104456			✓
Zm00001d051596	￪	1.91801	0.000499824	0.0252781			✓
Zm00001d051908	￪	1.73253	1.58e-05	0.00392927			✓
Zm00001d051938	￪	1.83818	0.000359326	0.0215624			✓
Zm00001d052458	￪	1.03225	0.000164592	0.0142372			✓
Zm00001d052537	￪	5.65941	0.000480005	0.0250805			✓	pebp6
Zm00001d052660	￪	1.31808	2.74e-05	0.00543102			✓
Zm00001d052903	￪	1.10496	0.000515338	0.0257869			✓
Zm00001d052947	￪	1.74359	8.62e-06	0.0028683			✓
Zm00001d053006	￪	1.49283	0.00166652	0.0481491			✓
Zm00001d000500	￪	1.29074	0.00115294	0.0391146
Zm00001d000691	￪	2.09412	2.85e-07	0.000575194
Zm00001d000967	￪	1.33948	9.87e-06	0.00304444
Zm00001d002019	￪	1.11356	0.000206327	0.0164898
Zm00001d002579	￪	1.07493	0.000465868	0.0247805
Zm00001d002744	￪	2.69946	6.91e-06	0.00264956
Zm00001d002899	￪	2.89769	4.5e-06	0.00245446
Zm00001d002940	￪	3.16216	5.22e-06	0.00255518
Zm00001d002992	￪	1.00902	0.000317423	0.0200577
Zm00001d003760	￪	3.43538	1.05e-07	0.000397944
Zm00001d004506	￪	1.79842	0.000474546	0.024933
Zm00001d005037	￪	1.49784	0.00140891	0.0440723
Zm00001d005898	￪	1.23064	0.000554292	0.026639
Zm00001d006193	￪	2.12598	0.000226636	0.0171469
Zm00001d006340	￪	1.1157	0.000256789	0.0181166
Zm00001d007469	￪	1.64019	1.07e-05	0.00318603
Zm00001d007865	￪	1.18278	0.00151082	0.045601
Zm00001d008153	￪	1.08577	0.00073525	0.0307677
Zm00001d008173	￪	2.15904	0.000104346	0.0116098
Zm00001d008199	￪	1.42563	0.000346034	0.020978
Zm00001d008311	￪	1.33461	0.000657387	0.0287153
Zm00001d008665	￪	1.12236	0.000325198	0.0202917
Zm00001d008872	￪	3.13541	0.000277549	0.0188388				ereb186
Zm00001d009090	￪	1.01775	0.000211739	0.0168057
Zm00001d009140	￪	3.26146	0.000217103	0.0169191
Zm00001d009399	￪	3.044	8.43e-06	0.0028683
Zm00001d009503	￪	1.44018	0.000172008	0.0147885
Zm00001d009718	￪	7.64262	0.000214306	0.016825
Zm00001d010380	￪	2.47429	1.64e-06	0.00120736
Zm00001d010499	￪	2.11223	0.000124639	0.012643
Zm00001d010713	￪	0.97422	0.001488	0.0452947				cpp8
Zm00001d011125	￪	1.12861	0.000335601	0.0207444
Zm00001d011202	￪	1.77385	1.11e-05	0.00322373
Zm00001d012128	￪	1.25104	0.000140096	0.0130915				arr7
Zm00001d012362	￪	1.04949	0.00142147	0.044279
Zm00001d013212	￪	1.87104	8.32e-05	0.0103027
Zm00001d013281	￪	2.261	0.00077827	0.0314994
Zm00001d013461	￪	1.0855	0.00139276	0.0436151
Zm00001d013903	￪	3.47984	1.04e-06	0.000992563
Zm00001d014055	￪	2.54231	5.14e-06	0.00255518
Zm00001d015239	￪	1.23443	0.000196852	0.0159574
Zm00001d015289	￪	1.40577	0.000670416	0.028863
Zm00001d015356	￪	1.4047	0.000498682	0.0252654
Zm00001d015477	￪	1.07213	0.000703439	0.0298325
Zm00001d016160	￪	1.02729	0.000517775	0.0258178				kch7
Zm00001d017383	￪	1.42859	0.000177023	0.015128				myb26
Zm00001d017918	￪	1.48643	0.00156717	0.0463646
Zm00001d018191	￪	3.73689	6.07e-05	0.00860492
Zm00001d018677	￪	1.33195	0.000639489	0.0282696				hagtf31
Zm00001d018699	￪	1.78612	1.66e-06	0.00120736
Zm00001d018751	￪	2.39177	0.00023496	0.017451
Zm00001d019254	￪	1.25583	0.000658878	0.0287153
Zm00001d019925	￪	2.6744	0.000766519	0.0312916
Zm00001d020345	￪	1.19681	0.000128965	0.012643
Zm00001d020711	￪	1.94089	0.00105971	0.0375358
Zm00001d020811	￪	1.41512	0.000256262	0.0181166
Zm00001d021490	￪	1.04981	0.000656261	0.0287153
Zm00001d022245	￪	1.84496	0.00142744	0.044279
Zm00001d022342	￪	1.09785	0.000450648	0.0244004
Zm00001d022456	￪	1.54436	0.000652587	0.0287057
Zm00001d022524	￪	2.84264	1.4e-05	0.00368573
Zm00001d022571	￪	1.63876	2.86e-05	0.00563184
Zm00001d022944	￪	2.36606	0.00172612	0.0487594
Zm00001d023404	￪	1.81147	0.00159205	0.0468078
Zm00001d024762	￪	1.4756	2.24e-05	0.00473976
Zm00001d025018	￪	3.40311	0.00146221	0.0449806				expa3
Zm00001d025859	￪	1.50677	1.05e-05	0.00315874
Zm00001d025924	￪	1.00726	0.000930506	0.0347373
Zm00001d026072	￪	1.49314	0.0011454	0.0390123
Zm00001d026131	￪	1.3798	0.000112316	0.0121132
Zm00001d026370	￪	1.01907	0.000670867	0.028863
Zm00001d026452	￪	1.04365	0.00121282	0.0402458
Zm00001d027258	￪	4.27114	5.18e-06	0.00255518
Zm00001d027332	￪	1.88258	0.000445581	0.0242649
Zm00001d027455	￪	1.31654	0.000128951	0.012643
Zm00001d027894	￪	1.63667	0.000212946	0.016825
Zm00001d028601	￪	1.16035	5.42e-05	0.00793664
Zm00001d028692	￪	1.29782	0.00024422	0.0178583				pco124824
Zm00001d029274	￪	3.12933	0.000271546	0.0186998
Zm00001d029829	￪	1.68663	0.00158644	0.0467626
Zm00001d030343	￪	1.63193	0.00143776	0.044436
Zm00001d030851	￪	1.33028	5.62e-05	0.00817533
Zm00001d031203	￪	1.39447	0.00130874	0.0421663
Zm00001d031807	￪	1.11413	0.000371742	0.0219352
Zm00001d031848	￪	2.04392	0.00104657	0.0372097
Zm00001d032519	￪	2.59277	0.000467795	0.0247805
Zm00001d033273	￪	1.9519	0.00137508	0.0432987
Zm00001d033929	￪	1.51374	0.000128903	0.012643
Zm00001d035166	￪	1.46517	0.000113005	0.0121132
Zm00001d035494	￪	0.971615	0.000273128	0.0187178
Zm00001d035495	￪	1.46008	0.000503455	0.0253713
Zm00001d035505	￪	4.48048	0.000272628	0.0187178
Zm00001d036637	￪	8.04089	0.00056119	0.0267598
Zm00001d037317	￪	1.34462	0.00117246	0.0394602
Zm00001d037610	￪	1.75862	5.05e-05	0.00764892
Zm00001d037768	￪	1.58457	6.18e-05	0.00872626
Zm00001d037911	￪	1.15687	0.000546494	0.0264557
Zm00001d038358	￪	1.82588	3.2e-05	0.00582945
Zm00001d038365	￪	1.01088	2.64e-05	0.00526966
Zm00001d039148	￪	1.558	8.87e-05	0.010659
Zm00001d039619	￪	1.23567	3.33e-05	0.00601162
Zm00001d039975	￪	1.78773	9.57e-07	0.000992563
Zm00001d040567	￪	0.963208	0.000284932	0.0190663
Zm00001d040979	￪	2.36374	1.35e-05	0.00362489
Zm00001d041191	￪	1.46068	3.36e-05	0.00604036
Zm00001d041236	￪	1.1122	0.00147386	0.0451577
Zm00001d041656	￪	2.22571	0.00083186	0.0327536
Zm00001d042207	￪	1.35626	0.00180107	0.0498851
Zm00001d042274	￪	1.55078	7.05e-06	0.00266748
Zm00001d042637	￪	1.72245	9.66e-06	0.00304444
Zm00001d042898	￪	2.38564	3.25e-07	0.000575194
Zm00001d042899	￪	1.11827	0.000390835	0.0224924
Zm00001d043601	￪	1.66583	5.84e-06	0.00258325
Zm00001d043730	￪	2.78264	0.000145478	0.0134886
Zm00001d043733	￪	1.72109	0.00142624	0.044279
Zm00001d043734	￪	2.18784	5.39e-06	0.00258325
Zm00001d044045	￪	1.27808	4.87e-05	0.00762177
Zm00001d044078	￪	2.91834	1.05e-06	0.000992563
Zm00001d044686	￪	1.08619	0.000638091	0.0282696
Zm00001d044994	￪	1.10691	0.000457579	0.0245879
Zm00001d045321	￪	2.7384	0.00101662	0.036511
Zm00001d045988	￪	2.71469	0.000597133	0.0275477
Zm00001d047553	￪	1.35025	1.99e-05	0.00447278
Zm00001d048393	￪	1.1101	0.00134636	0.0427759
Zm00001d048680	￪	1.1752	0.00107383	0.0377799
Zm00001d048962	￪	1.43311	0.000125269	0.012643
Zm00001d049640	￪	1.39177	0.0010359	0.0370008
Zm00001d049870	￪	1.06706	0.000733932	0.0307587				bhlh165
Zm00001d051048	￪	3.21888	8.09e-05	0.0101193
Zm00001d051424	￪	1.85483	0.000238329	0.0175633
Zm00001d052064	￪	3.94654	1.55e-06	0.00120736
Zm00001d052147	￪	0.972856	0.000523346	0.0260498
Zm00001d052963	￪	2.46488	3.66e-05	0.00636914
Zm00001d053815	￪	2.51432	0.000219032	0.0169191
Zm00001d053988	￬	-1.08045	0.000408942	0.023205	*✓	✓	✓	bzip84	x	Zhang, YM et al. 2019. J Agric Food Chem pp.doi: 10.1021/acs.jafc.9b00322
Zm00001d016294	￬	-1.06778	0.000349429	0.0210936	*✓		✓	pyl3		He, ZH et al. 2018. Frontiers Plant Sci 9:422
Zm00001d023994	￬	-2.27043	5.11e-05	0.00764892	*✓		✓	glu1	x	Gómez-Anduro et al., 2011. Plant Mol Bio 77:159-183
Zm00001d002993	￬	-1.27018	0.000529807	0.0261101	✓		✓
Zm00001d006064	￬	-1.15514	5.86e-05	0.00841113	✓		✓		x
Zm00001d009612	￬	-2.69868	8.87e-06	0.00289317	✓		✓
Zm00001d018917	￬	-1.68045	0.0011673	0.039427	✓		✓
Zm00001d035963	￬	-1.07858	0.000634092	0.0281541	✓		✓
Zm00001d039414	￬	-1.39106	9.1e-05	0.0107521	✓		✓		x
Zm00001d039771	￬	-1.34555	0.000185682	0.0155155	✓		✓
Zm00001d043581	￬	-1.50727	1.98e-06	0.00137282	✓		✓		x
Zm00001d044476	￬	-1.08165	0.00150712	0.0455379	✓		✓		x
Zm00001d047796	￬	-1.11584	0.00125184	0.0411078	✓		✓		x
Zm00001d052673	￬	-1.56187	0.00107518	0.0377799	✓		✓	c2	x
Zm00001d003797	￬	-1.45022	8.06e-05	0.0101193	✓		✓		x
Zm00001d047671	￬	-1.97768	0.00101383	0.036503	✓	✓		myb154	x
Zm00001d014820	￬	-1.81383	0.000253453	0.0180678	✓				x
Zm00001d020921	￬	-4.22029	0.000262916	0.0182382	✓				x
Zm00001d026016	￬	-1.10395	0.00105602	0.0374987	✓				x
Zm00001d038718	￬	-1.39621	0.000268623	0.0185435	✓			hb2	x
Zm00001d048737	￬	-1.51155	0.000980581	0.0357008	✓
Zm00001d000222	￬	-1.15226	0.00168077	0.048199			✓	sweet1a	x
Zm00001d002284	￬	-1.14226	0.00106603	0.0376694			✓
Zm00001d002806	￬	-1.21501	0.000671422	0.028863			✓	dbb2
Zm00001d002951	￬	-1.27498	0.00103653	0.0370008			✓
Zm00001d002989	￬	-2.02388	0.000151701	0.013769			✓	ckx12	x
Zm00001d003058	￬	-0.985279	0.000830987	0.0327536			✓		x
Zm00001d003085	￬	-1.03524	0.000585776	0.0272453			✓		x
Zm00001d003463	￬	-1.90262	9.87e-06	0.00304444			✓
Zm00001d003663	￬	-0.988883	0.00157267	0.0464307			✓		x
Zm00001d003676	￬	-1.96683	7.9e-05	0.0100018			✓		x
Zm00001d004009	￬	-1.32042	3.73e-05	0.00637645			✓
Zm00001d004439	￬	-1.07136	0.00109107	0.0380762			✓		x
Zm00001d004451	￬	-1.79003	8.97e-05	0.010659			✓
Zm00001d004480	￬	-1.70672	1.49e-05	0.00380517			✓		x
Zm00001d004626	￬	-2.49929	3.63e-05	0.00635802			✓		x
Zm00001d005174	￬	-2.3267	1.91e-06	0.00135398			✓		x
Zm00001d006282	￬	-1.02952	0.000917841	0.0345001			✓		x
Zm00001d006446	￬	-2.33906	0.00172717	0.0487594			✓	sm2	x
Zm00001d006511	￬	-1.67985	0.000331629	0.0206338			✓		x
Zm00001d006704	￬	-1.05501	0.00120285	0.0400555			✓		x
Zm00001d006823	￬	-1.12991	0.000551572	0.0266083			✓
Zm00001d006871	￬	-0.963805	0.000957439	0.0353131			✓
Zm00001d007154	￬	-1.28835	0.000702114	0.0298209			✓
Zm00001d007403	￬	-2.82904	0.00073252	0.0307587			✓	whp1
Zm00001d009373	￬	-1.24599	0.000495324	0.0251852			✓		x
Zm00001d009425	￬	-1.43576	0.000797229	0.0320837			✓
Zm00001d009509	￬	-1.10987	0.00105801	0.0375224			✓
Zm00001d010422	￬	-1.63268	0.00053296	0.0261101			✓		x
Zm00001d010755	￬	-1.28857	0.00069091	0.0295218			✓	trps1
Zm00001d011451	￬	-1.48009	0.000969523	0.0354019			✓		x
Zm00001d011466	￬	-1.46674	0.00111763	0.0385758			✓
Zm00001d011878	￬	-1.46352	0.000565343	0.026783			✓		x
Zm00001d011921	￬	-2.96097	0.000422906	0.0237585			✓		x
Zm00001d012707	￬	-1.2168	0.00168655	0.0482241			✓		x
Zm00001d012719	￬	-1.51595	7.62e-05	0.00983242			✓	bzip20	x
Zm00001d013010	￬	-1.22645	0.000738099	0.0307833			✓
Zm00001d014918	￬	-1.43097	8.22e-05	0.0102318			✓		x
Zm00001d014971	￬	-3.57471	0.000599721	0.0275726			✓		x
Zm00001d015008	￬	-1.18626	0.000893002	0.0340084			✓
Zm00001d015569	￬	-1.29182	0.000411441	0.0232727			✓		x
Zm00001d016031	￬	-1.99964	8.96e-05	0.010659			✓		x
Zm00001d016036	￬	-1.17992	0.000109826	0.0120133			✓		x
Zm00001d016154	￬	-1.37955	0.000936772	0.0348337			✓	bzip89	x
Zm00001d016276	￬	-1.12163	0.000880872	0.0339377			✓	rps24
Zm00001d016625	￬	-2.15663	6.76e-06	0.00264956			✓
Zm00001d016721	￬	-1.33463	0.0013238	0.0423438			✓
Zm00001d016756	￬	-1.48499	0.00162607	0.0473663			✓
Zm00001d017187	￬	-1.0081	0.000492423	0.0251426			✓		x
Zm00001d017659	￬	-0.986667	0.00141932	0.044279			✓
Zm00001d017994	￬	-1.81212	0.000236529	0.017476			✓
Zm00001d018609	￬	-1.11986	0.00059344	0.0275116			✓
Zm00001d018617	￬	-2.64585	0.000565452	0.026783			✓	ga2ox12
Zm00001d020147	￬	-1.22521	0.00156569	0.0463646			✓		x
Zm00001d020280	￬	-1.37114	0.000162313	0.014083			✓		x
Zm00001d020537	￬	-1.10714	0.000220563	0.0169191			✓	o5	x
Zm00001d020605	￬	-2.03399	0.00093958	0.0348793			✓
Zm00001d020691	￬	-1.62688	0.000325283	0.0202917			✓		x
Zm00001d020887	￬	-4.00224	2.89e-05	0.0056587			✓
Zm00001d021337	￬	-4.52835	0.000715017	0.0302332			✓		x
Zm00001d021562	￬	-7.86877	0.000159062	0.0140153			✓
Zm00001d021634	￬	-2.26068	5.27e-05	0.0077842			✓		x
Zm00001d021652	￬	-1.06237	0.000816122	0.03243			✓	rpl44	x
Zm00001d021653	￬	-1.15358	0.000209329	0.0166828			✓		x
Zm00001d021667	￬	-1.04171	0.000488608	0.0251344			✓		x
Zm00001d022478	￬	-2.13623	0.00111204	0.0384765			✓
Zm00001d023242	￬	-1.85016	5.43e-05	0.00793664			✓		x
Zm00001d023450	￬	-2.76918	6.17e-06	0.00258325			✓		x
Zm00001d023781	￬	-1.27175	0.000606161	0.0276051			✓
Zm00001d023804	￬	-1.75227	0.000809591	0.0323062			✓		x
Zm00001d023887	￬	-1.5596	2.16e-05	0.00468808			✓		x
Zm00001d024105	￬	-2.09028	0.00145253	0.0447947			✓
Zm00001d025247	￬	-2.53078	4.22e-06	0.00234497			✓		x
Zm00001d025885	￬	-7.34636	0.000134987	0.0128941			✓	ckx11	x
Zm00001d025901	￬	-1.86079	0.000134981	0.0128941			✓
Zm00001d026160	￬	-1.30046	0.000564414	0.026783			✓	gar2
Zm00001d026486	￬	-1.86938	0.000611301	0.0276616			✓	ereb190	x
Zm00001d026530	￬	-1.35116	0.00167811	0.0481897			✓		x
Zm00001d026542	￬	-0.995382	0.000879811	0.0339377			✓	glk52	x
Zm00001d027899	￬	-1.50098	0.000872903	0.0338724			✓	zim26	x
Zm00001d028025	￬	-1.60154	0.000231457	0.0173269			✓		x
Zm00001d028510	￬	-1.06928	0.000384523	0.0222193			✓		x
Zm00001d028742	￬	-1.23071	0.000359475	0.0215624			✓	fad8
Zm00001d028754	￬	-2.59765	9.95e-05	0.0112909			✓		x
Zm00001d028793	￬	-1.67627	0.000115859	0.0121746			✓		x
Zm00001d029075	￬	-1.26156	0.000125929	0.012643			✓
Zm00001d029124	￬	-1.28981	0.000248869	0.0180344			✓
Zm00001d029325	￬	-0.98257	0.00107992	0.0377799			✓
Zm00001d029859	￬	-5.71251	1.42e-05	0.00368648			✓		x
Zm00001d029913	￬	-1.65392	0.0011159	0.0385631			✓	expb6	x
Zm00001d031659	￬	-1.38299	4.68e-05	0.00746174			✓	pdh2	x
Zm00001d031665	￬	-0.997632	0.000886425	0.033986			✓	bhlh173
Zm00001d032504	￬	-0.967706	0.000792197	0.0319448			✓
Zm00001d032688	￬	-1.11155	8.88e-05	0.010659			✓		x
Zm00001d032973	￬	-1.03225	0.000555839	0.026639			✓		x
Zm00001d033024	￬	-2.22422	0.00100049	0.0362064			✓		x
Zm00001d033181	￬	-0.985762	0.000298196	0.0194184			✓
Zm00001d033279	￬	-1.38303	0.000146854	0.0135718			✓
Zm00001d033319	￬	-1.92878	0.000155012	0.01384			✓	iaa3	x
Zm00001d033790	￬	-1.01778	0.00136644	0.043172			✓		x
Zm00001d034067	￬	-1.52882	0.000533947	0.0261101			✓		x
Zm00001d034298	￬	-1.50184	1.82e-05	0.00435343			✓	bhlh47	x
Zm00001d034416	￬	-1.10017	0.00127936	0.0417218			✓
Zm00001d034851	￬	-0.983167	0.000154897	0.01384			✓		x
Zm00001d035195	￬	-1.06737	0.00133654	0.0425182			✓
Zm00001d035243	￬	-2.0162	0.000240106	0.0176028			✓		x
Zm00001d035629	￬	-1.10176	0.000279333	0.0188696			✓	pza03063	x
Zm00001d035875	￬	-1.3542	0.000526593	0.0261087			✓
Zm00001d037023	￬	-1.76562	0.00168745	0.0482241			✓
Zm00001d037210	￬	-2.59427	0.000889101	0.0339967			✓		x
Zm00001d037495	￬	-1.1341	0.000160551	0.0140591			✓		x
Zm00001d037644	￬	-0.97619	0.00132377	0.0423438			✓
Zm00001d037784	￬	-1.32578	0.000630436	0.0280797			✓	sm1	x
Zm00001d038049	￬	-3.52165	0.000403603	0.0230868			✓
Zm00001d038126	￬	-1.79509	9.85e-05	0.0112276			✓
Zm00001d038371	￬	-1.81536	1.04e-06	0.000992563			✓	lac2
Zm00001d038476	￬	-2.25214	0.000507405	0.0254798			✓	expa5
Zm00001d039081	￬	-1.77432	0.000341605	0.0209331			✓		x
Zm00001d039378	￬	-1.76754	0.00134853	0.042797			✓		x
Zm00001d039946	￬	-1.46264	2.19e-05	0.00471156			✓		x
Zm00001d040441	￬	-1.04192	0.000963221	0.0353131			✓		x
Zm00001d041404	￬	-1.21551	0.00060965	0.027631			✓		x
Zm00001d041476	￬	-1.4078	5.65e-05	0.00818029			✓
Zm00001d041701	￬	-1.44394	0.000333213	0.0206869			✓
Zm00001d041827	￬	-2.48592	0.00010295	0.011545			✓
Zm00001d042141	￬	-1.12913	0.00122003	0.0404221			✓		x
Zm00001d042317	￬	-2.17322	0.00162557	0.0473663			✓		x
Zm00001d042611	￬	-1.39108	0.00168781	0.0482241			✓	ga20ox3
Zm00001d042772	￬	-1.25412	1.39e-05	0.00368533			✓
Zm00001d043047	￬	-3.41761	9.75e-05	0.0112015			✓	expa1	x
Zm00001d043244	￬	-1.55777	0.000492713	0.0251426			✓		x
Zm00001d043444	￬	-1.3864	0.000105035	0.0116408			✓
Zm00001d043520	￬	-1.30117	0.000262632	0.0182382			✓		x
Zm00001d044021	￬	-1.4105	0.000892612	0.0340084			✓		x
Zm00001d044465	￬	-1.40436	9.36e-06	0.00298457			✓		x
Zm00001d044579	￬	-2.48604	0.000540031	0.0262525			✓		x
Zm00001d044640	￬	-1.05204	0.000340765	0.0209268			✓		x
Zm00001d044683	￬	-1.63643	6.84e-05	0.00937169			✓		x
Zm00001d044970	￬	-1.46361	0.000905343	0.0342944			✓		x
Zm00001d045304	￬	-1.43597	0.000193273	0.0157121			✓
Zm00001d045423	￬	-1.97121	0.000367794	0.0218764			✓	tac8193	x
Zm00001d045432	￬	-1.0412	0.00135335	0.0429021			✓		x
Zm00001d045538	￬	-1.17177	0.000119691	0.0123486			✓
Zm00001d045579	￬	-1.09157	0.000658183	0.0287153			✓
Zm00001d045685	￬	-1.31782	0.000497631	0.0252572			✓		x
Zm00001d045721	￬	-1.40852	0.000563473	0.026783			✓
Zm00001d046134	￬	-2.30519	0.000249758	0.0180344			✓		x
Zm00001d046317	￬	-1.04129	0.000381118	0.0221563			✓		x
Zm00001d046642	￬	-1.90308	1.09e-05	0.00318603			✓
Zm00001d046667	￬	-1.85191	8.98e-05	0.010659			✓		x
Zm00001d046668	￬	-2.40973	0.000746105	0.0308579			✓
Zm00001d047186	￬	-1.36066	0.00031678	0.0200577			✓		x
Zm00001d047252	￬	-2.47773	4.61e-05	0.0073877			✓		x
Zm00001d047253	￬	-1.17691	0.00127055	0.0414822			✓	sus1
Zm00001d047697	￬	-1.1276	0.00098853	0.0359111			✓
Zm00001d047944	￬	-1.82087	0.000232259	0.0173412			✓
Zm00001d048214	￬	-2.23016	0.000362677	0.0217086			✓
Zm00001d048669	￬	-2.2516	0.000306553	0.0197343			✓		x
Zm00001d049096	￬	-1.66928	6.67e-05	0.00923284			✓		x
Zm00001d049625	￬	-3.89694	0.00153148	0.0459143			✓		x
Zm00001d050079	￬	-1.15641	0.00144419	0.0445861			✓		x
Zm00001d050346	￬	-1.76803	1.84e-05	0.00435343			✓
Zm00001d050768	￬	-1.94539	1.93e-07	0.000497613			✓	crr7	x
Zm00001d051062	￬	-1.01712	0.00109574	0.0381919			✓		x
Zm00001d051110	￬	-1.53367	3.19e-05	0.00582945			✓
Zm00001d051474	￬	-0.99088	0.0017769	0.0494863			✓		x
Zm00001d051543	￬	-1.13553	0.000923348	0.034561			✓		x
Zm00001d051802	￬	-1.62127	0.000740076	0.0307833			✓		x
Zm00001d051936	￬	-2.32118	4.52e-05	0.00728578			✓
Zm00001d052586	￬	-1.19878	0.00115392	0.0391146			✓
Zm00001d052792	￬	-1.90401	3.52e-05	0.00627227			✓		x
Zm00001d052804	￬	-1.00631	0.0008458	0.0330538			✓	myb63	x
Zm00001d052906	￬	-1.57157	0.000579713	0.027052			✓
Zm00001d053220	￬	-2.01215	0.000157778	0.013989			✓	myb42	x
Zm00001d053234	￬	-3.17791	0.000444194	0.0242649			✓
Zm00001d000402	￬	-1.18893	0.00137565	0.0432987
Zm00001d000438	￬	-7.86892	0.000158396	0.014
Zm00001d000550	￬	-1.58068	0.000772011	0.0314254
Zm00001d002514	￬	-1.67374	8.33e-06	0.0028683					x
Zm00001d003118	￬	-4.74596	0.000777829	0.0314994					x
Zm00001d003142	￬	-2.80264	7.31e-05	0.00969903					x
Zm00001d003144	￬	-1.63924	0.000633307	0.0281541
Zm00001d003183	￬	-1.84835	0.00123929	0.0408376
Zm00001d003459	￬	-1.59332	0.000677446	0.029052
Zm00001d003488	￬	-1.24533	0.00170838	0.0484235					x
Zm00001d003504	￬	-1.30038	0.00044661	0.0242744					x
Zm00001d003848	￬	-1.19814	2.97e-05	0.00569298					x
Zm00001d004309	￬	-3.10221	7.56e-05	0.00979728					x
Zm00001d004452	￬	-2.81557	1.29e-05	0.00356173
Zm00001d005821	￬	-1.65955	2.4e-05	0.00501482
Zm00001d005879	￬	-1.92665	0.000448963	0.0243556					x
Zm00001d006279	￬	-1.34893	0.0005347	0.0261101
Zm00001d006285	￬	-1.32958	0.000792652	0.0319448					x
Zm00001d006521	￬	-1.21866	0.000374529	0.0220459
Zm00001d006879	￬	-0.989777	0.00177597	0.0494863					x
Zm00001d006882	￬	-1.20902	0.0010162	0.036511
Zm00001d008209	￬	-1.13789	0.00130792	0.0421663					x
Zm00001d010459	￬	-2.85516	0.000165131	0.0142404					x
Zm00001d011406	￬	-2.27415	0.00123798	0.0408376				hsftf25
Zm00001d011757	￬	-2.31175	0.00106614	0.0376694					x
Zm00001d012019	￬	-1.49296	0.000482464	0.0251344					x
Zm00001d012274	￬	-1.01834	0.0017477	0.0490949				hct10	x
Zm00001d014852	￬	-1.22804	0.000299925	0.0194725
Zm00001d015715	￬	-3.59066	0.000639684	0.0282696					x
Zm00001d015744	￬	-1.20158	0.000433137	0.0238251					x
Zm00001d016408	￬	-2.86402	1.34e-05	0.00362489					x
Zm00001d016435	￬	-1.84698	0.000103611	0.0115735					x
Zm00001d016696	￬	-1.15485	0.00106887	0.037719					x
Zm00001d017069	￬	-1.28005	9.45e-05	0.0109465					x
Zm00001d017279	￬	-0.995139	0.00029471	0.0193553					x
Zm00001d017438	￬	-1.64485	0.000187571	0.0155155					x
Zm00001d020163	￬	-4.577	0.00130625	0.0421663					x
Zm00001d020578	￬	-1.09724	0.00118909	0.039737					x
Zm00001d020869	￬	-1.21202	0.000918073	0.0345001
Zm00001d021200	￬	-1.22345	2.01e-05	0.00450075					x
Zm00001d021995	￬	-1.39218	0.000479583	0.0250805
Zm00001d022175	￬	-1.12439	0.0015031	0.0454648
Zm00001d022374	￬	-1.06654	7.73e-05	0.00988184					x
Zm00001d022637	￬	-2.25446	7.34e-06	0.00270465					x
Zm00001d022965	￬	-1.37722	0.00113998	0.0389322
Zm00001d023117	￬	-2.48155	0.000990056	0.0359205
Zm00001d023869	￬	-2.56747	5.75e-06	0.00258325
Zm00001d023870	￬	-4.24205	1.53e-07	0.000481339					x
Zm00001d023872	￬	-5.16219	0.000407882	0.0231912					x
Zm00001d023873	￬	-2.35134	3.08e-05	0.00582623
Zm00001d024382	￬	-1.37949	0.00022027	0.0169191					x
Zm00001d024786	￬	-1.809	0.000288851	0.0191819					x
Zm00001d025707	￬	-2.01151	0.000189604	0.0155698					x
Zm00001d026554	￬	-1.13144	4.38e-05	0.00717689
Zm00001d026594	￬	-1.9254	1.54e-05	0.00386062				crr2	x
Zm00001d026859	￬	-2.44541	0.000152385	0.013769
Zm00001d027320	￬	-1.3093	0.000397228	0.0228141					x
Zm00001d028172	￬	-1.87248	0.00156522	0.0463646
Zm00001d028953	￬	-1.51434	0.000188655	0.0155597					x
Zm00001d029903	￬	-2.94466	0.00060556	0.0276051
Zm00001d029906	￬	-2.49091	0.000186808	0.0155155
Zm00001d031046	￬	-1.26896	0.000726394	0.030623
Zm00001d031303	￬	-1.10514	0.000490782	0.0251344					x
Zm00001d031653	￬	-1.01614	0.00131862	0.0423438					x
Zm00001d031701	￬	-1.1786	0.00168184	0.048199					x
Zm00001d031730	￬	-1.54535	0.000315813	0.0200453
Zm00001d032495	￬	-3.91666	0.00043294	0.0238251					x
Zm00001d033308	￬	-1.28151	7.41e-05	0.00971483
Zm00001d033634	￬	-1.05317	0.00129994	0.0421508					x
Zm00001d033747	￬	-1.32074	0.000371874	0.0219352				gln2
Zm00001d034017	￬	-1.23219	0.000896	0.034036					x
Zm00001d034143	￬	-1.56541	0.00122098	0.0404221				hagtf6	x
Zm00001d034692	￬	-1.15663	0.00169094	0.0482648					x
Zm00001d034715	￬	-0.99355	0.000687169	0.0294063				raf2	x
Zm00001d037153	￬	-5.62462	0.000321938	0.0202528
Zm00001d037892	￬	-1.59876	0.00073395	0.0307587					x
Zm00001d038019	￬	-3.80181	8.54e-06	0.0028683					x
Zm00001d040836	￬	-2.87868	0.00117	0.0394401
Zm00001d040837	￬	-2.73635	0.000917384	0.0345001
Zm00001d041663	￬	-2.59706	0.00170252	0.0484008					x
Zm00001d041769	￬	-1.19446	0.000150242	0.0137505					x
Zm00001d041927	￬	-1.04794	0.00161943	0.0473135					x
Zm00001d041965	￬	-1.41984	0.00148322	0.0452205
Zm00001d043489	￬	-1.03468	0.00175779	0.0492774
Zm00001d043742	￬	-1.30959	0.000114866	0.0121604					x
Zm00001d043780	￬	-0.950328	0.000191278	0.0155947				thr1	x
Zm00001d046995	￬	-0.99981	0.00151402	0.045632					x
Zm00001d047090	￬	-2.81821	0.000403495	0.0230868					x
Zm00001d047207	￬	-1.19626	0.000154007	0.01384
Zm00001d047441	￬	-2.32871	0.000967409	0.0353703					x
Zm00001d048368	￬	-1.16769	0.000489502	0.0251344
Zm00001d048593	￬	-1.16795	0.00112149	0.0386151				rca1	x
Zm00001d048643	￬	-3.68459	5.81e-06	0.00258325
Zm00001d048719	￬	-3.7643	1.46e-05	0.00377063
Zm00001d048720	￬	-3.39407	7.66e-06	0.00271835
Zm00001d049020	￬	-1.60579	0.000622061	0.0279258				rtp1	x
Zm00001d049081	￬	-1.67657	8.62e-05	0.0105192					x
Zm00001d049113	￬	-3.24945	0.000278794	0.0188696					x
Zm00001d049525	￬	-1.39698	0.000337645	0.0208253					x
Zm00001d049657	￬	-1.59141	0.000132915	0.0128267				gst26	x
Zm00001d049722	￬	-2.0712	0.000488247	0.0251344
Zm00001d049851	￬	-1.0862	0.000297873	0.0194184					x
Zm00001d050889	￬	-1.47046	0.00103543	0.0370008					x
Zm00001d051223	￬	-2.27972	0.000552385	0.0266083
Zm00001d051309	￬	-1.19432	0.00129821	0.0421427					x
Zm00001d051472	￬	-2.53093	0.000212055	0.0168057					x
Zm00001d052039	￬	-1.06674	5e-05	0.00764892
Zm00001d052684	￬	-2.4385	0.000253206	0.0180678					x
Zm00001d053225	￬	-2.79022	0.000325416	0.0202917					x
				* ABA-responsive by literature

## Sheet: Sheet1
Zm00001d053988	￬	-1.08045	0.000408942	0.023205	*✓	✓	✓	bzip84	x
Zm00001d023994	￬	-2.27043	5.11e-05	0.00764892	*✓		✓	glu1	x
Zm00001d006064	￬	-1.15514	5.86e-05	0.00841113	✓		✓		x
Zm00001d039414	￬	-1.39106	9.1e-05	0.0107521	✓		✓		x
Zm00001d043581	￬	-1.50727	1.98e-06	0.00137282	✓		✓		x
Zm00001d044476	￬	-1.08165	0.00150712	0.0455379	✓		✓		x
Zm00001d047796	￬	-1.11584	0.00125184	0.0411078	✓		✓		x
Zm00001d052673	￬	-1.56187	0.00107518	0.0377799	✓		✓	c2	x
Zm00001d003797	￬	-1.45022	8.06e-05	0.0101193	✓		✓		x
Zm00001d047671	￬	-1.97768	0.00101383	0.036503	✓	✓		myb154	x
Zm00001d014820	￬	-1.81383	0.000253453	0.0180678	✓				x
Zm00001d020921	￬	-4.22029	0.000262916	0.0182382	✓				x
Zm00001d026016	￬	-1.10395	0.00105602	0.0374987	✓				x
Zm00001d038718	￬	-1.39621	0.000268623	0.0185435	✓			hb2	x
Zm00001d016294	￬	-1.06778	0.000349429	0.0210936	*✓		✓	pyl3
Zm00001d002993	￬	-1.27018	0.000529807	0.0261101	✓		✓
Zm00001d009612	￬	-2.69868	8.87e-06	0.00289317	✓		✓
Zm00001d018917	￬	-1.68045	0.0011673	0.039427	✓		✓
Zm00001d035963	￬	-1.07858	0.000634092	0.0281541	✓		✓
Zm00001d039771	￬	-1.34555	0.000185682	0.0155155	✓		✓
Zm00001d048737	￬	-1.51155	0.000980581	0.0357008	✓

## Sheet: III  MOP1-silenced
Gene	DE in group III	log2FC	p-value	FDR	siRNAs depleted in mop1-1 mutant / Mop1 wildtype (Wang et al., 2016)	Nearby Transposable Elements (within 3 kb)	Loss of CHH DNA methylation in mop1-1 MS / Mop1 MS)	Loss of CG or CHG DNA methylation in mop1-1 MS / Mop1 MS	MOP1 predicted targets (GRN)	Gene name / function
Zm00001d009610	✓	1.99353	8.56e-06	0.00421289	✓	✓	✓	✓	✓
Zm00001d040075	✓	2.08418	0.000165577	0.0323519	✓	✓	✓	✓	✓	Glycosyltranferase domain
Zm00001d051324	✓	8.44146	3.87e-05	0.0113292	✓	✓	✓	✓	✓	chr167
Zm00001d006503	✓	3.65376	6.51e-05	0.0161896			✓	✓	✓
Zm00001d007287	✓	3.59182	4.3e-07	0.000762629	✓	✓		✓	✓	Ribosomal protein L18ae/LX
Zm00001d023257	✓	4.62179	0.000113713	0.0250098		✓		✓	✓
Zm00001d036616	✓	1.83743	0.000230732	0.0414325		✓		✓	✓
Zm00001d018118	✓	4.11179	2.34e-05	0.00837018				✓	✓
Zm00001d033314	✓	6.15455	6.1e-07	0.000914467	✓	✓		✓		abi30
Zm00001d012392	✓	10.1785	6.24e-06	0.00361112	✓	✓		✓		Protein kinase domain
Zm00001d012387	✓	2.01206	2.39e-05	0.00837018	✓	✓		✓
Zm00001d004620	✓	1.34362	0.000145672	0.0299492	✓	✓	`		✓
Zm00001d043870	✓	1.06813	2.98e-05	0.00972108	✓	✓	✓		✓
Zm00001d035222	✓	3.06203	2.58e-06	0.00227002		✓	✓		✓
Zm00001d033148	✓	1.9234	4.96e-05	0.0136624		✓	✓		✓
Zm00001d032511	✓	2.41976	0.000152154	0.0304008		✓	✓		✓
Zm00001d047882	✓	1.78262	6.12e-07	0.000914467	✓	✓			✓
Zm00001d047900	✓	3.32801	2.72e-06	0.00227002	✓	✓			✓	Leucine-rich repeat domain
Zm00001d048635	✓	1.76779	9.1e-05	0.0215128	✓	✓			✓	Leucine-rich repeat domain
Zm00001d053305	✓	7.93517	9.66e-05	0.0221074	✓	✓			✓
Zm00001d004446	✓	2.46344	1.19e-05	0.00535395		✓			✓
Zm00001d026431	✓	1.95507	2.05e-05	0.00774851		✓			✓
Zm00001d034385	✓	1.98551	2.14e-05	0.00788687		✓			✓	ao3
Zm00001d002830	✓	1.22814	2.38e-05	0.00837018		✓			✓	ivr1
Zm00001d017068	✓	2.30782	4.29e-05	0.0121817		✓			✓
Zm00001d016291	✓	1.81551	5.62e-05	0.0147212		✓			✓
Zm00001d002952	✓	7.57939	5.91e-05	0.0148502		✓			✓
Zm00001d029829	✓	2.534	7.83e-05	0.0191559		✓			✓
Zm00001d037249	✓	8.28555	8.15e-05	0.0197539		✓			✓
Zm00001d051088	✓	1.35031	0.00025004	0.043257		✓			✓
Zm00001d003186	✓	5.81171	1.3e-06	0.00167835	✓	✓
Zm00001d003167	✓	2.33592	5.44e-06	0.00331086	✓	✓				CBF1-interacting-corepressor
Zm00001d012413	✓	2.67432	1.63e-05	0.00658779	✓	✓				WRKY domain
Zm00001d003088	✓	2.84705	2.04e-05	0.00774851	✓	✓
Zm00001d003118	✓	6.95785	9.78e-09	9.25e-05		✓
Zm00001d003304	✓	8.50932	5.32e-08	0.00030203		✓
Zm00001d002899	✓	4.15301	2.23e-07	0.000632517		✓
Zm00001d023828	✓	2.59811	1e-06	0.00135099		✓
Zm00001d003140	✓	10.6706	2.61e-06	0.00227002		✓
Zm00001d003191	✓	4.8074	3.09e-06	0.00243319		✓
Zm00001d002897	✓	6.54435	7.74e-06	0.00412613		✓
Zm00001d002979	✓	3.89811	7.75e-06	0.00412613		✓
Zm00001d025140	✓	9.0251	8.41e-06	0.00421289		✓
Zm00001d003003	✓	3.50005	1.13e-05	0.00515209		✓
Zm00001d001823	✓	8.85147	1.42e-05	0.00599158		✓
Zm00001d023657	✓	9.03412	1.76e-05	0.00704006		✓
Zm00001d042658	✓	1.06963	2.48e-05	0.00859054		✓
Zm00001d012702	✓	1.17183	0.00011278	0.0249983		✓
Zm00001d021017	✓	4.22657	0.000152083	0.0304008		✓
Zm00001d030724	✓	8.0099	0.000181757	0.0341511		✓
Zm00001d004843	✓	1.19989	0.000248133	0.043257		✓				aasr2
Zm00001d003411	✓	4.1542	2.52e-07	0.000641448
Zm00001d003332	✓	8.83069	1.94e-05	0.00754242
Zm00001d047060	✓	3.74158	2.58e-05	0.00872954
Zm00001d002836	✓	2.00557	4.68e-05	0.0130223
Zm00001d003395	✓	1.08667	9.9e-05	0.0224689						ans1
Zm00001d016160	✓	1.12173	0.000262456	0.0441648						kch7

## Sheet: IV MOP1-dependent
Gene zm number	DE in group IV	log2FC	p-value	FDR	siRNAs depleted in mop1-1 mutant / Mop1 wildtype (Wang et al., 2016)	Nearby Transposable Elements (within 3 kb)	Loss of CHH DNA methylation (mop1-1 MS / Mop1 MS)	Loss of CG or CHG DNA methylation in (mop1-1 MS / Mop1 MS)	MOP1 predicted targets (GRN)	DNG103 predicted targets (GRN)	CG hypermethylation (mop1-1 MS / Mop1 MS)	Gene name / function
Zm00001d005790	✓	-1.51965	4.34e-06	0.00308169	✓	✓	✓	✓
Zm00001d052827	✓	-2.2409	0.000281619	0.0467258	✓	✓	✓	✓			✓
Zm00001d012335	✓	-1.9469	0.000263071	0.0441648		✓	✓	✓				czog2
Zm00001d003261	✓	-1.70365	0.000261371	0.0441648		✓		✓	✓	✓	✓
Zm00001d027946	✓	-2.55049	9.38e-05	0.0219888		✓		✓		✓		hct1
Zm00001d017279	✓	-1.01598	0.000248599	0.043257		✓		✓
Zm00001d002849	✓	-2.99346	7.85e-06	0.00412613		✓		✓			✓
Zm00001d039139	✓	-2.2663	0.00020834	0.0378848	✓	✓	✓				✓
Zm00001d003193	✓	-0.979544	0.000199012	0.0369044		✓	✓
Zm00001d003352	✓	-1.31556	1.63e-06	0.00182059	✓	✓			✓			Per1-like
Zm00001d002993	✓	-1.49189	0.00014693	0.0299595					✓
Zm00001d003268	✓	-1.03675	5.91e-05	0.0148502					✓			Ku70-binding protein
Zm00001d003125	✓	-1.82023	2.53e-05	0.00866042	✓	✓						mgt3
Zm00001d003143	✓	-7.35142	0.000206699	0.0378352	✓	✓
Zm00001d003114	✓	-5.10331	8.43e-06	0.00421289	✓	✓
Zm00001d003086	✓	-4.14763	4.96e-06	0.00319864	✓	✓					✓
Zm00001d003155	✓	-2.09575	3.98e-07	0.000762629	✓	✓
Zm00001d003378	✓	-1.95641	8.35e-08	0.000394915	✓	✓						mop1
Zm00001d003151	✓	-1.43193	2.93e-05	0.00972108	✓	✓
Zm00001d003196	✓	-2.02349	6.9e-06	0.00391668	✓
Zm00001d003128	✓	-11.7941	4.1e-08	0.000291156		✓
Zm00001d003267	✓	-11.6112	2.77e-07	0.000641448		✓
Zm00001d003306	✓	-9.95987	7.12e-09	9.25e-05		✓
Zm00001d003312	✓	-7.4509	1.87e-06	0.00183265		✓
Zm00001d003381	✓	-2.80914	2.07e-07	0.000632517		✓
Zm00001d011655	✓	-2.42788	3.07e-06	0.00243319		✓						mkkk18
Zm00001d003317	✓	-2.17699	0.00020964	0.0378848		✓
Zm00001d003102	✓	-2.05151	4.72e-06	0.00318717		✓
Zm00001d044267	✓	-1.63507	7.85e-06	0.00412613		✓
Zm00001d003195	✓	-1.62455	5.62e-05	0.0147212		✓				✓		dbb1
Zm00001d026182	✓	-1.26823	5.71e-05	0.0147212		✓
Zm00001d003310	✓	-2.15411	2.96e-05	0.00972108						✓

## Sheet: V_VI
Gene	Gene name	Differentially Expressed genes in V,VI	log2FC	p-value	FDR	Uniquely DE in mop1-1 mutant	siRNAs depleted in mop1-1 mutant / Mop1 wildtype (Wang et al., 2016)	loss of CHH (mop1-1 MS / Mop1 MS)	loss of CG or CHG ( mop1-1 MS / Mop1 MS)	ABA Primary targets (ABRE, CE)	ABA Secondary targets (GRN)	MOP1 predicted targets (GRN)	DNG103 predicted targets (GRN)	CG hypermethylation (mop1-1 MS / Mop1 MS)	References for ABA primary targets
Zm00001d015614	myb50	￪	1.52103	0.00237294	0.0303266	x		x	x		`
Zm00001d013494	ole3	￪	5.54228	5.09e-06	0.000977238					*✓	x			x	Williams, BA; Tsang, A. 1994. Dev Genet 15:415-424
Zm00001d004357	prh10	￪	4.72178	0.000505133	0.012147	x				*✓	x				Wang, YG et al. 2018. Plant Mol Biol pp.doi: 10.1007/s11103-017-0692-7
Zm00001d037894	dhn1	￪	3.76922	7.98e-07	0.000309928				x	*✓	x				Busk, P et al. 1997. Plant J 11:1285-1295
Zm00001d020717	abh4	￪	3.54892	8.36e-08	9.12e-05					*✓	x				Vallabhaneni, R; Wurtzel, E. 2010. Arch Biochem Biophys. 504:112-7
Zm00001d017762	abh1	￪	2.76965	2.29e-07	0.000144241		x			*✓	x				Vallabhaneni, R; Wurtzel, E. 2010. Arch Biochem Biophys. 504:112-7
Zm00001d011495	prh20	￪	2.7432	6.56e-06	0.00112802					*✓	x				Wang, YG et al. 2018. Plant Mol Biol pp.doi: 10.1007/s11103-017-0692-7
Zm00001d038846	prh12	￪	2.20252	9.17e-06	0.00137677					*✓	x				Wang, YG et al. 2018. Plant Mol Biol pp.doi: 10.1007/s11103-017-0692-7
Zm00001d044301	prh13	￪	2.17239	0.000268375	0.00854179					*✓	x				Wang, YG et al. 2018. Plant Mol Biol pp.doi: 10.1007/s11103-017-0692-7
Zm00001d020100	prh6	￪	2.07735	8.07e-05	0.00434622	x	x			*✓	x				Wang, YG et al. 2018. Plant Mol Biol pp.doi: 10.1007/s11103-017-0692-7
Zm00001d018178	bzip4	￪	2.04626	5.09e-07	0.00023672		x	x		*✓	x				Ma, HZ et al. 2018. Plant Physiol pp.doi: 10.1104/pp.18.00436
Zm00001d023529	aasr1	￪	2.03867	6.11e-06	0.00110377		x	x	x	*✓	x				Zhang, J et al. 2019. Int J Mol Sci 20:133
Zm00001d043992	bzip1	￪	1.83806	1.69e-05	0.00190952				x	*✓	x		x		Nieva, C, et al. 2005. Plant Mol Biol. 58:899-914
Zm00001d024160	bzip107	￪	1.78402	0.000141419	0.00596513	x	x			*✓	x				Zhang, YM et al. 2019. J Agric Food Chem pp.doi: 10.1021/acs.jafc.9b00322
Zm00001d000002	du1	￪	1.78024	9.92e-06	0.0014506		x	x		*✓	x		x	x	Wu, JD et al. 2015. Genet. Mol. Res. 14:5468-5479
Zm00001d002351	tps1	￪	1.71591	0.000625146	0.0136078	x	x			*✓	x				Fu, JY et al. 2015. Plant Physiol pp.DOI: 10.1104/pp.15.01727
Zm00001d042482	bhlh132	￪	1.43051	0.00020076	0.00725804	x		x		*✓	x		x	x	Rabissi, A et al. 2016. Plant Sci 253:1-12
Zm00001d047220	snrkII1	￪	1.32061	7.48e-05	0.0042219	x	x			*✓	x	x			Huai, JL. 2008. Plant Cell Rep. 27:1861-8
Zm00001d026447	ereb156	￪	1.25186	0.00035152	0.00987457					*✓	x			x	Huang, HH et al. 2016. Sci. Rep. Article number: 27590
Zm00001d033483	dhn13	￪	1.24785	5.77e-05	0.00370776	x		x	x	*✓	x		x	x	Liu, Y et al. 2017. Sci. Rep. 7:7361
Zm00001d045042	sh1	￪	1.05986	8.51e-05	0.00445546	x				*✓	x	x			Ren et al., 2015. Genet. Mol. Res. 14:1671-1678
Zm00001d027854	sut1	￪	0.989705	0.00321173	0.0362367	x				*✓	x			x	Ren et al., 2015. Genet. Mol. Res. 14:1671-1678
Zm00001d038923	rack1	￬	-1.05955	6.95e-05	0.00408644	x		x		*✓	x		x	x	Wang, B et al. 2014. Int J Mol Sci 15:9343-9359
Zm00001d053988	bzip84	￬	-1.1093	0.000169003	0.00655945					*✓	x				Zhang, YM et al. 2019. J Agric Food Chem pp.doi: 10.1021/acs.jafc.9b00322
Zm00001d014993	bip1	￬	-1.16047	0.000139668	0.00595489	x				*✓	x				Yang et al., 2013. Plant Cell Physiol. 54:2020-2033
Zm00001d051362	tip2a	￬	-1.66964	0.000548531	0.0126356	x		x		*✓	x			x	Zhu, C et al. 2005. J Exp Bot 56:2971-2981
Zm00001d023994	glu1	￬	-1.78795	0.000197847	0.0072058					*✓	x			x	Gómez-Anduro et al., 2011. Plant Mol Bio 77:159-183
Zm00001d032230	tps7	￬	-2.00623	0.000213072	0.00752837	x				*✓	x				Ren, F et al. 2016. Planta pp.doi: 10.1007/s00425-016-2570-y
Zm00001d031228		￪	8.99738	0.000268549	0.00854179	x			x	✓	x
Zm00001d022376		￪	7.0262	0.000206083	0.00736759			x	x	✓	x			x
Zm00001d008983		￪	4.93959	2.63e-08	4.54e-05					✓	x
Zm00001d044039		￪	4.82215	0.00516206	0.0482246	x		x	x	✓	x
Zm00001d025229		￪	4.23103	2.17e-06	0.000582445			x		✓	x			x
Zm00001d017422	hb41	￪	4.08818	5.03e-09	3.67e-05		x			✓	x
Zm00001d002952		￪	4.02846	2.32e-06	0.000594105					✓	x
Zm00001d025055	prh11	￪	3.94254	1.44e-06	0.000470811		x	x	x	✓	x			x
Zm00001d007876	nced4	￪	3.93789	0.000131159	0.00576935			x	x	✓	x			x
Zm00001d032610	tip3b	￪	3.89062	0.004666	0.0452439		x			✓	x				Nieva, C, et al. 2005. Plant Mol Biol. 58:899-914
Zm00001d047639		￪	3.8367	0.000352113	0.00988145	x				✓	x			x
Zm00001d002360		￪	3.83015	0.000388008	0.0104347	x				✓	x
Zm00001d040613		￪	3.72042	1.13e-08	3.67e-05					✓	x
Zm00001d007341		￪	3.6185	0.000211153	0.00747919	x	x	x	x	✓	x
Zm00001d006813	cadtfr6	￪	3.22461	5.39e-05	0.00361514					✓	x
Zm00001d014083		￪	3.15596	1.8e-05	0.0019848	x		x		✓	x			x
Zm00001d015310		￪	2.9569	0.00491352	0.0467653	x				✓	x	x
Zm00001d012068	psei10	￪	2.93372	2.31e-06	0.000594105				x	✓	x		x
Zm00001d025477		￪	2.88194	0.000525775	0.0125145	x				✓	x			x
Zm00001d025964	hb70	￪	2.87795	3.9e-05	0.00313477		x	x	x	✓	x
Zm00001d037724	ga2ox6	￪	2.86217	7.79e-06	0.00125581				x	✓	x			x
Zm00001d043180		￪	2.7612	5.6e-05	0.00366655			x		✓	x			x
Zm00001d013501	ca2p1	￪	2.73358	0.000789406	0.0157062	x	x			✓	x
Zm00001d042886	prh3	￪	2.64685	2.32e-08	4.4e-05			x		✓	x
Zm00001d053195	ereb111	￪	2.62283	1.77e-05	0.00196122		x	x		✓	x			x
Zm00001d052958		￪	2.56955	0.00239213	0.0304484	x				✓	x			x
Zm00001d022069		￪	2.55368	1.31e-08	3.67e-05				x	✓	x			x
Zm00001d029717		￪	2.48692	0.000599123	0.0133171	x				✓	x
Zm00001d005609	prh7	￪	2.44868	8.43e-07	0.000315759		x	x	x	✓	x
Zm00001d035000		￪	2.39327	7.06e-07	0.000289814					✓	x		x
Zm00001d019163	aga1	￪	2.38376	4.2e-05	0.00322215		x			✓	x
Zm00001d030086		￪	2.36549	6.97e-06	0.00118485			x	x	✓	x
Zm00001d034571	bzip29	￪	2.3618	0.00157284	0.0240405	x				✓	x
Zm00001d050308		￪	2.32469	4.08e-05	0.00318421					✓	x			x
Zm00001d012401	prh4	￪	2.31265	6.32e-07	0.000271569					✓	x
Zm00001d026414		￪	2.25397	5.98e-07	0.000262715		x	x		✓	x
Zm00001d014481		￪	2.20569	1.08e-05	0.00150388		x			✓	x	x
Zm00001d013003	nactf60	￪	2.20173	0.000539883	0.0126356	x		x		✓	x
Zm00001d050347		￪	2.18648	1.25e-07	0.000104033			x	x	✓	x
Zm00001d021059	sacd8	￪	2.17932	7.67e-06	0.00125161		x	x	x	✓	x			x
Zm00001d039065	gbf1	￪	2.13221	5.1e-06	0.000977238					✓	x		x	x
Zm00001d039077	ereb34	￪	2.12527	8.83e-05	0.00453406	x	x			✓	x
Zm00001d009626	prh9	￪	2.1019	7.15e-07	0.000289814					✓	x
Zm00001d044167	ofp19	￪	2.05684	0.00116029	0.019849	x				✓	x
Zm00001d045204	ereb122	￪	2.0009	2.04e-06	0.000562915					✓	x		x
Zm00001d048868		￪	1.98369	2.18e-06	0.000582445					✓	x			x
Zm00001d008812	c3h47	￪	1.95344	0.000781881	0.0156002	x				✓	x		x
Zm00001d037334	myb106	￪	1.94588	0.000328886	0.00952159	x				✓	x		x
Zm00001d032307		￪	1.92037	0.000929605	0.0175248	x				✓	x
Zm00001d023294	nactf25	￪	1.90802	0.00338475	0.0373231	x		x		✓	x		x	x	Mao, H et al. 2015. Nature Communications 6: 8326
Zm00001d010652		￪	1.89721	1.26e-06	0.000430262					✓	x
Zm00001d043263	dgk7	￪	1.88335	7.17e-05	0.00413706					✓	x		x
Zm00001d011257		￪	1.88233	0.000272733	0.00860732	x	x	x	x	✓	x
Zm00001d038526		￪	1.81455	3.05e-06	0.000727433					✓	x
Zm00001d012956		￪	1.80192	0.000494426	0.0119801	x		x	x	✓	x		x
Zm00001d052639		￪	1.78241	0.00015369	0.0062603	x				✓	x
Zm00001d022210		￪	1.73448	0.00149867	0.0233243	x				✓	x		x
Zm00001d013087	hagtf21	￪	1.68675	0.00153261	0.0235938	x				✓	x
Zm00001d043060	wrky81	￪	1.67635	0.00358402	0.0386198	x				✓	x
Zm00001d032295	dbf1	￪	1.66372	0.000138207	0.00592329	x				✓	x		x	x
Zm00001d018682		￪	1.65736	0.00345102	0.0377312	x				✓	x
Zm00001d053817		￪	1.63846	6.38e-05	0.00389945					✓	x			x
Zm00001d022204		￪	1.61342	4.73e-05	0.00339055	x		x	x	✓	x	x
Zm00001d047290		￪	1.60256	1.28e-05	0.00163412			x		✓	x			x
Zm00001d031290	xer3	￪	1.59838	1.4e-05	0.00170415					✓	x
Zm00001d004700		￪	1.52628	0.00271143	0.0328234	x				✓	x
Zm00001d048201		￪	1.52377	2.63e-05	0.00248779					✓	x		x
Zm00001d038695	ga2ox7	￪	1.51145	0.000287595	0.00883341		x			✓	x
Zm00001d038408		￪	1.50075	1.01e-05	0.00145823	x	x	x	x	✓	x
Zm00001d052268	gol1	￪	1.48969	1.8e-05	0.00198468		x			✓	x	x	x
Zm00001d027341		￪	1.45182	5.29e-05	0.00359721					✓	x
Zm00001d032069		￪	1.44487	8.07e-05	0.00434622					✓	x
Zm00001d031773		￪	1.44053	2.57e-05	0.00247128	x			x	✓	x
Zm00001d026308		￪	1.43872	0.00061803	0.0135404	x		x		✓	x			x
Zm00001d046299	hsftf28	￪	1.43095	8.66e-06	0.00133544					✓	x
Zm00001d025947		￪	1.43089	0.000231827	0.00793415	x		x	x	✓	x
Zm00001d050125		￪	1.41899	2.48e-05	0.00242411					✓	x
Zm00001d016299	mcf1	￪	1.41645	6.28e-05	0.00388847	x	x		x	✓	x		x	x
Zm00001d031189		￪	1.40668	0.000416769	0.0108582	x				✓	x			x
Zm00001d043318		￪	1.39275	0.000414157	0.0108218	x		x		✓	x		x
Zm00001d035134		￪	1.38802	9.61e-05	0.00481502			x	x	✓	x		x
Zm00001d027520	expa6	￪	1.38771	0.000155342	0.00629933		x	x	x	✓	x
Zm00001d027370		￪	1.3844	0.000311212	0.0092749					✓	x
Zm00001d026126		￪	1.37699	0.00017335	0.00665531					✓	x			x
Zm00001d053049		￪	1.37086	1.3e-05	0.00164489					✓	x
Zm00001d046632	myb112	￪	1.32683	2.11e-05	0.00222418		x	x	x	✓	x
Zm00001d005451		￪	1.32256	0.000276463	0.00866719	x		x		✓	x			x
Zm00001d021627		￪	1.32216	0.000281576	0.00875013	x				✓	x
Zm00001d039941		￪	1.3036	0.000149495	0.00616494	x	x			✓	x
Zm00001d036982	ln1	￪	1.26676	0.000642752	0.0138246	x				✓	x		x	x
Zm00001d036736	bzip76	￪	1.26525	0.0046725	0.045276	x	x	x	x	✓	x
Zm00001d028696		￪	1.26232	0.00174445	0.0253552	x		x	x	✓	x			x
Zm00001d028962	wrky32	￪	1.24502	1.28e-05	0.00163412	x				✓	x
Zm00001d043221		￪	1.23534	0.0016332	0.0244574	x	x			✓	x
Zm00001d014007		￪	1.23421	7.94e-05	0.00430687			x		✓	x
Zm00001d016982		￪	1.22943	0.000175197	0.00669904		x	x	x	✓	x
Zm00001d038860		￪	1.22723	5.38e-05	0.00361514		x		x	✓	x			x
Zm00001d015397		￪	1.20045	0.0019528	0.0271233	x				✓	x
Zm00001d047995	hb62	￪	1.17184	0.000251177	0.00833497					✓	x
Zm00001d012387		￪	1.16838	0.000433304	0.0111512	x	x		x	✓	x		x
Zm00001d029975	snrkII3	￪	1.16189	3.1e-05	0.00271115		x			✓	x			x
Zm00001d003897		￪	1.15923	0.000711478	0.0147586	x				✓	x			x
Zm00001d027443	hyd6	￪	1.15324	0.00164202	0.0244574	x		x	x	✓	x			x
Zm00001d028282	aos2	￪	1.14368	0.00319003	0.0361886	x				✓	x		x	x
Zm00001d014089		￪	1.11998	0.00529904	0.0490081			x		✓	x
Zm00001d017539		￪	1.11349	0.000107028	0.00507097	x		x	x	✓	x
Zm00001d050266		￪	1.06836	0.000822198	0.0162334	x				✓	x		x	x
Zm00001d047236		￪	1.06582	0.00183223	0.0260041	x	x	x		✓	x			x
Zm00001d033675		￪	1.049	0.000412485	0.0108218	x			x	✓	x			x
Zm00001d028293		￪	1.04103	8.56e-05	0.00445546	x				✓	x			x
Zm00001d028214		￪	1.02787	0.000135503	0.00587146	x				✓	x
Zm00001d026368		￪	1.02501	0.000187745	0.00697212	x		x		✓	x
Zm00001d046210		￪	1.01816	0.000270567	0.00856795			x	x	✓	x	x		x
Zm00001d012720		￪	1.01433	0.0016858	0.024857	x			x	✓	x
Zm00001d042026		￪	1.0038	0.000378536	0.0102479	x				✓	x	x
Zm00001d019531		￪	0.986427	0.00296439	0.0347832	x				✓	x			x
Zm00001d002782		￪	0.979992	0.000275802	0.00866224	x			x	✓	x
Zm00001d008727	pld2	￪	0.965722	0.000193174	0.00711119	x				✓	x				Chen, L et al. 2016. Plant Growth Regulation pp.doi: 10.1007/s10725-016-0197-4
Zm00001d011392	cdpk17	￬	-0.957467	0.000324342	0.00945758	x	x			✓	x
Zm00001d025656		￬	-0.959574	9.92e-05	0.00489436	x				✓	x	x		x
Zm00001d034077		￬	-0.970419	0.00272176	0.0329023	x				✓	x
Zm00001d048299		￬	-0.984413	0.00418878	0.0421583	x				✓	x
Zm00001d023810		￬	-0.991231	0.000779714	0.0155789	x				✓	x			x
Zm00001d034112		￬	-1.0186	0.0030289	0.0351345	x		x	x	✓	x
Zm00001d018415	pcna1	￬	-1.02923	0.000257816	0.0083694	x				✓	x		x	x	de la Paz Sanchez, M; Gurusinghe , SH; Bradford, K; Vazquez-Ramos, JM. 2005. J Exp Bot. 56:515-523
Zm00001d039581	ca5p15	￬	-1.05073	0.00295777	0.0347342	x			x	✓	x
Zm00001d020392		￬	-1.07474	3.32e-05	0.00282482	x				✓	x
Zm00001d015198		￬	-1.09936	0.00361568	0.0387945	x				✓	x
Zm00001d027763		￬	-1.12013	0.00253599	0.0315437	x				✓	x
Zm00001d018056	bhlh30	￬	-1.14172	0.000588878	0.0131868	x				✓	x
Zm00001d015064	sdg129	￬	-1.14854	0.00258667	0.0319082	x				✓	x		x	x
Zm00001d018631		￬	-1.14919	0.000735131	0.0149406	x				✓	x
Zm00001d013139		￬	-1.16615	0.000194204	0.0071188	x	x			✓	x		x
Zm00001d040634		￬	-1.16721	0.0038949	0.040316	x				✓	x			x
Zm00001d027589		￬	-1.17789	0.000450841	0.0114066	x	x	x	x	✓	x		x
Zm00001d033132		￬	-1.20109	0.00406555	0.0414218	x				✓	x			x
Zm00001d048055		￬	-1.20944	0.000548675	0.0126356	x	x		x	✓	x		x	x
Zm00001d051778		￬	-1.2135	0.00123102	0.0204368	x				✓	x
Zm00001d043422		￬	-1.21833	0.00288141	0.034177	x		x	x	✓	x	x
Zm00001d027346		￬	-1.23041	0.00137941	0.0220414	x				✓	x
Zm00001d036770		￬	-1.24003	0.000993767	0.0181904	x			x	✓	x
Zm00001d044476		￬	-1.2565	0.000258115	0.0083694					✓	x			x
Zm00001d036558		￬	-1.27936	0.00152971	0.0235746	x				✓	x			x
Zm00001d027760		￬	-1.27986	0.000141835	0.00596513	x			x	✓	x			x
Zm00001d028414		￬	-1.29854	0.000357215	0.00999496	x				✓	x			x
Zm00001d011112		￬	-1.37415	0.00272643	0.0329447	x				✓	x	x	x
Zm00001d035963		￬	-1.39061	4e-05	0.00318421					✓	x
Zm00001d039771		￬	-1.39873	6.88e-05	0.00407458					✓	x			x
Zm00001d027488	gpb1	￬	-1.45132	0.000805809	0.0159654	x				✓	x		x
Zm00001d036431		￬	-1.47911	0.000449111	0.011389	x				✓	x
Zm00001d042438		￬	-1.49665	0.00365481	0.0389389	x				✓	x
Zm00001d002993		￬	-1.51757	7.46e-05	0.0042219					✓	x	x
Zm00001d028630		￬	-1.69184	0.000693141	0.0145537	x				✓	x		x
Zm00001d015921		￬	-1.74966	0.000151973	0.00621295	x		x	x	✓	x		x
Zm00001d038285	ofp27	￬	-1.7551	0.000506911	0.012147	x	x			✓	x
Zm00001d003797		￬	-1.78982	6.48e-06	0.00112802				x	✓	x			x
Zm00001d043581		￬	-1.79511	1.75e-07	0.00013418					✓	x
Zm00001d039414		￬	-1.86735	3.38e-06	0.000761072					✓	x		x
Zm00001d014758	plt6	￬	-1.9654	5.74e-05	0.00370776	x				✓	x	x
Zm00001d045454		￬	-1.99658	0.00457699	0.0446555	x				✓	x		x	x
Zm00001d018917		￬	-2.04944	0.000149748	0.00616638					✓	x
Zm00001d014820		￬	-2.07319	5.1e-05	0.00353155			x	x	✓	x		x	x
Zm00001d009612		￬	-2.82761	4.99e-06	0.000976429		x		x	✓	x			x
Zm00001d020921		￬	-3.94723	0.000300264	0.0090149			x	x	✓	x		x	x
Zm00001d040113	pebp10	￪	8.31705	0.000217871	0.0076503						x			x
Zm00001d047261		￪	7.4198	0.000274408	0.00865056						x
Zm00001d007143		￪	7.39783	0.000400009	0.0106464	x					x
Zm00001d022278		￪	6.61246	0.00215509	0.0286995	x					x
Zm00001d048694	mmp174	￪	6.52427	8.41e-06	0.0013044				x		x			x
Zm00001d047259		￪	6.34583	1.69e-07	0.00013329			x	x		x
Zm00001d009140		￪	5.38618	1.96e-06	0.000551424		x				x			x
Zm00001d043709		￪	5.34642	2.46e-07	0.000151594		x		x		x
Zm00001d023859		￪	5.30302	0.00123417	0.0204651	x		x	x		x
Zm00001d050055		￪	5.22703	7.44e-07	0.000296818			x	x		x			x
Zm00001d009718		￪	4.94703	0.000150389	0.00618098				x		x			x
Zm00001d048629		￪	4.86706	0.000730395	0.0149085	x	x				x
Zm00001d048991	ereb106	￪	4.6341	1.26e-05	0.00163412						x
Zm00001d052537	pebp6	￪	4.51945	0.000364238	0.0101018						x
Zm00001d036766		￪	4.23816	0.0042739	0.0427677	x	x	x	x		x
Zm00001d032519		￪	4.22211	3.27e-06	0.000754402						x			x
Zm00001d019504		￪	4.17726	5.04e-05	0.00351628	x					x
Zm00001d016255	hsftf18	￪	4.16002	2.83e-07	0.000167539						x
Zm00001d050977		￪	4.05426	0.000360922	0.0100393	x			x		x
Zm00001d045988		￪	4.02833	9.09e-06	0.00137677						x			x
Zm00001d032138		￪	3.97284	1.68e-08	3.67e-05						x
Zm00001d004442		￪	3.96731	5.37e-07	0.000241758			x	x		x
Zm00001d017453		￪	3.8195	5.27e-06	0.00099766						x			x
Zm00001d044142	csu845	￪	3.70029	1.27e-08	3.67e-05						x
Zm00001d020332		￪	3.66709	2.72e-08	4.54e-05			x			x
Zm00001d001996		￪	3.62716	1.44e-06	0.000470811						x
Zm00001d027924	ereb179	￪	3.61612	0.00267758	0.0325764	x	x				x			x
Zm00001d002161		￪	3.57049	0.000403369	0.0106757	x			x		x
Zm00001d045883		￪	3.48363	1.71e-05	0.00192189						x	x		x
Zm00001d033612	ole4	￪	3.35386	0.000165256	0.00649398						x
Zm00001d004171		￪	3.3529	4.33e-05	0.00322956						x	x
Zm00001d020620		￪	3.18482	4.16e-05	0.00322215		x	x	x		x			x
Zm00001d044460		￪	3.11393	0.000444724	0.0113265	x					x
Zm00001d029366		￪	3.10023	5.59e-05	0.00366655		x				x		x	x
Zm00001d046281		￪	3.08636	2.12e-08	4.3e-05						x			x
Zm00001d035079	zar5	￪	3.06343	2.11e-06	0.000576316						x				Wang, YG et al. 2018. Plant Mol Biol pp.doi: 10.1007/s11103-017-0692-7
Zm00001d033254		￪	2.95952	2.21e-05	0.00228809	x					x			x
Zm00001d017065		￪	2.94646	4.85e-08	5.87e-05						x
Zm00001d014744		￪	2.9067	4.55e-07	0.000218611						x		x
Zm00001d041656		￪	2.88874	3.05e-05	0.00270004						x			x
Zm00001d007395		￪	2.85263	4.81e-05	0.0034066						x
Zm00001d012221	sacd9	￪	2.85138	0.00313089	0.0357929	x					x			x
Zm00001d030498		￪	2.78861	9.05e-06	0.00137677						x
Zm00001d029091	sus2	￪	2.76826	1.83e-06	0.000534781						x
Zm00001d032253		￪	2.73437	2.3e-06	0.000594105						x
Zm00001d044864		￪	2.72885	4.89e-05	0.00343515			x			x			x
Zm00001d039394	ga2ox13	￪	2.7135	0.000926377	0.0174988	x	x	x			x		x	x
Zm00001d033943		￪	2.71002	9.64e-05	0.00481502			x	x		x
Zm00001d044124	yz1	￪	2.695	6.33e-05	0.00388847		x				x			x
Zm00001d004624		￪	2.68558	1.01e-07	9.79e-05						x
Zm00001d008793	wrky80	￪	2.67575	0.0003087	0.00921941	x					x
Zm00001d038911		￪	2.64432	4.28e-09	3.67e-05						x
Zm00001d046824		￪	2.64296	0.000780433	0.0155823	x					x
Zm00001d005748		￪	2.63485	2.38e-05	0.00237346		x				x
Zm00001d010287		￪	2.61849	0.0012905	0.0209898	x	x		x		x	x		x
Zm00001d002958		￪	2.61734	0.000220161	0.00772113	x					x
Zm00001d033369		￪	2.58532	4.45e-07	0.000218611						x		x
Zm00001d014617	xet1	￪	2.57193	4.14e-06	0.000860978						x		x
Zm00001d039482	dof7	￪	2.57172	0.000276941	0.00866762	x					x
Zm00001d044748		￪	2.55839	3.13e-06	0.000738293						x
Zm00001d042148	cko2	￪	2.54525	3.57e-07	0.000191025						x
Zm00001d019446		￪	2.54408	0.000680076	0.0143758						x				Liu, S et al. 1998. Plant Cell Rep 17:650-655
Zm00001d010499		￪	2.52302	7.43e-06	0.00122571		x				x
Zm00001d047260		￪	2.50864	5.34e-07	0.000241758			x			x
Zm00001d041844		￪	2.49746	0.00346664	0.0378	x		x	x		x
Zm00001d009382		￪	2.49085	0.000118469	0.0053977		x				x
Zm00001d029835		￪	2.4882	4.3e-07	0.000218611						x
Zm00001d047994		￪	2.47982	4.96e-08	5.87e-05			x	x		x			x
Zm00001d010586		￪	2.47855	5.04e-06	0.000977238						x
Zm00001d052063		￪	2.3673	0.000138605	0.00593138	x	x	x	x		x			x
Zm00001d002939		￪	2.3662	0.000171871	0.00661647	x					x
Zm00001d022245		￪	2.35109	7.45e-05	0.0042219						x
Zm00001d039826		￪	2.34295	0.00010706	0.00507097	x					x
Zm00001d027755		￪	2.31842	1.54e-08	3.67e-05				x		x
Zm00001d010856		￪	2.30943	1.66e-05	0.00189456	x		x	x		x
Zm00001d038891		￪	2.30098	6.3e-05	0.00388847	x					x			x
Zm00001d038703		￪	2.29272	0.000204211	0.00733403	x					x
Zm00001d018751		￪	2.28649	9.69e-05	0.00482936				x		x			x
Zm00001d025018	expa3	￪	2.26953	0.0040774	0.0414787						x			x
Zm00001d034978		￪	2.25895	4.4e-07	0.000218611						x		x
Zm00001d016128		￪	2.2534	8.86e-05	0.00453508	x					x			x
Zm00001d021990		￪	2.25007	0.00224689	0.0294316	x					x
Zm00001d034787		￪	2.18315	0.00137972	0.0220414	x					x
Zm00001d006476	aco5	￪	2.17648	0.000150538	0.00618098	x	x				x			x
Zm00001d023269		￪	2.17545	0.00221861	0.0292094	x	x		x		x		x	x
Zm00001d007718	bx13	￪	2.17148	0.00173156	0.0252067	x					x			x
Zm00001d037453		￪	2.16511	1.7e-06	0.000530723						x
Zm00001d012313		￪	2.16379	2.49e-06	0.000630904			x			x			x
Zm00001d032906		￪	2.14265	0.000408985	0.0107641	x	x				x			x
Zm00001d047547		￪	2.13882	1.01e-05	0.00145823			x	x		x			x
Zm00001d052961		￪	2.13507	0.000162677	0.00643286	x	x				x
Zm00001d042862		￪	2.13485	3.56e-07	0.000191025				x		x			x
Zm00001d033273		￪	2.12	0.000239746	0.00811703						x
Zm00001d037610		￪	2.11755	2.6e-06	0.000649613		x				x
Zm00001d020961		￪	2.11141	0.000250423	0.00833497	x			x		x			x
Zm00001d051938		￪	2.10574	2.65e-05	0.00249252		x	x			x
Zm00001d017033		￪	2.09682	0.00018433	0.00691774	x			x		x		x
Zm00001d017968		￪	2.09137	2.38e-05	0.00237346			x	x		x	x
Zm00001d038320	ereb133	￪	2.08122	0.0014114	0.0224338	x					x
Zm00001d039315		￪	2.0798	9.29e-05	0.00470239	x					x
Zm00001d038913	ltp1	￪	2.05931	7.79e-06	0.00125581		x				x
Zm00001d012764	me4	￪	2.01995	0.000825739	0.0162694	x					x	x
Zm00001d025859		￪	2.0125	1.86e-07	0.000135272						x		x	x
Zm00001d017547		￪	2.01238	0.000198156	0.00720778	x		x	x		x			x
Zm00001d041787		￪	2.00268	0.00183072	0.0260041	x					x
Zm00001d035053	mads45	￪	1.99459	0.00483173	0.0463128	x	x				x			x
Zm00001d051908		￪	1.98393	1.16e-06	0.000405049						x			x
Zm00001d028808		￪	1.97168	0.00162298	0.0243895	x	x	x	x		x			x
Zm00001d017032		￪	1.97162	0.00118572	0.0200144	x					x			x
Zm00001d004705		￪	1.9681	4.6e-05	0.00332114	x					x
Zm00001d044075		￪	1.9662	0.00120048	0.0201244	x					x
Zm00001d037608		￪	1.96367	0.00416055	0.0419579	x	x				x
Zm00001d051596		￪	1.95591	0.000139213	0.00594842						x			x
Zm00001d039919		￪	1.93699	1.16e-05	0.00156898						x			x
Zm00001d033230		￪	1.93393	0.000967981	0.0179689	x		x	x		x			x
Zm00001d018106		￪	1.92525	0.000583197	0.0130906	x	x	x			x
Zm00001d027649		￪	1.9201	0.000790541	0.0157177	x			x		x
Zm00001d004416		￪	1.91861	0.00275489	0.0331055	x	x				x			x
Zm00001d052947		￪	1.91401	8.46e-07	0.000315759						x
Zm00001d051584		￪	1.90533	1.64e-08	3.67e-05		x		x		x			x
Zm00001d026512		￪	1.89993	0.00131337	0.0212655	x	x				x			x
Zm00001d009116		￪	1.89019	0.000160609	0.00643286	x					x
Zm00001d042207		￪	1.88402	5.23e-05	0.00359516						x
Zm00001d028778		￪	1.88175	4.44e-07	0.000218611						x
Zm00001d039619		￪	1.88094	1.96e-07	0.000135895						x	x
Zm00001d031203		￪	1.87784	4.3e-05	0.00322835		x	x	x		x
Zm00001d014517		￪	1.87265	0.00459833	0.0448021	x	x				x			x
Zm00001d024798		￪	1.86657	0.000453128	0.0114175	x					x		x	x
Zm00001d038358		￪	1.85926	6.73e-06	0.00115054						x
Zm00001d052079	lkrsdh1	￪	1.85526	0.000463858	0.011585	x					x	x
Zm00001d051194		￪	1.85017	6.91e-05	0.00407823						x
Zm00001d002592	acs2	￪	1.84792	0.00546436	0.0499213	x					x		x
Zm00001d016076		￪	1.84741	0.000476572	0.0118122	x	x	x			x
Zm00001d047883		￪	1.84602	0.000432857	0.0111512	x	x				x
Zm00001d011968		￪	1.84542	0.000338328	0.00966672	x					x			x
Zm00001d042274		￪	1.84389	3.5e-07	0.000191025						x
Zm00001d008869	hb52	￪	1.83077	7.01e-05	0.00410327			x			x
Zm00001d029550	dgk4	￪	1.82493	0.000854503	0.0166625	x					x			x
Zm00001d024572		￪	1.82472	3.38e-06	0.000761072						x		x
Zm00001d049926		￪	1.8229	1.59e-05	0.00184725			x			x			x
Zm00001d012285	mybr55	￪	1.82087	0.00227001	0.0296051	x	x				x
Zm00001d040659		￪	1.81913	0.000269144	0.00854667	x			x		x		x
Zm00001d032144	ereb60	￪	1.81495	0.00057843	0.0130289		x		x		x			x
Zm00001d024800		￪	1.80211	0.00219425	0.0290369	x					x
Zm00001d037095		￪	1.79727	0.000208768	0.00741323	x					x
Zm00001d028092		￪	1.79571	0.000172529	0.00663277						x
Zm00001d041191		￪	1.78871	1.44e-06	0.000470811						x			x
Zm00001d027256		￪	1.77959	4.57e-05	0.00331701		x				x			x
Zm00001d045264		￪	1.77437	2.05e-05	0.00218503	x					x
Zm00001d021738		￪	1.77204	0.00105724	0.018771	x			x		x			x
Zm00001d040026		￪	1.77132	0.000526964	0.0125229	x					x		x	x
Zm00001d040619		￪	1.76927	3.14e-05	0.00273572	x	x				x			x
Zm00001d026670		￪	1.76889	6.28e-05	0.00388847						x		x
Zm00001d014664		￪	1.76426	0.000378207	0.0102479	x		x	x		x
Zm00001d013390		￪	1.75457	1.12e-05	0.00154105						x
Zm00001d040029		￪	1.74546	0.000100515	0.00492115	x	x				x
Zm00001d031848		￪	1.74388	0.00103812	0.0185926						x			x
Zm00001d020133		￪	1.74253	4.39e-08	5.73e-05		x		x		x			x
Zm00001d043752		￪	1.74182	3.22e-05	0.00277387	x		x	x		x
Zm00001d025864	myb132	￪	1.74021	0.000409975	0.0107796	x		x			x			x
Zm00001d011269		￪	1.73021	1.98e-07	0.000135895				x		x
Zm00001d002904		￪	1.72732	0.00150919	0.0234367	x			x		x	x		x
Zm00001d043549		￪	1.72381	0.000154435	0.00627742						x
Zm00001d017619		￪	1.72035	0.00108179	0.0190401	x					x
Zm00001d006158		￪	1.7162	4.47e-07	0.000218611						x
Zm00001d008808	mybr24	￪	1.71508	0.000267754	0.00853563	x					x
Zm00001d044526		￪	1.7131	0.000255068	0.00836129	x		x			x			x
Zm00001d033080		￪	1.71297	0.00218684	0.0289795	x					x
Zm00001d011655	mkkk18	￪	1.71014	4e-05	0.00318421	x					x
Zm00001d034783	cchh5	￪	1.70838	0.00169076	0.0248812	x	x				x
Zm00001d017989		￪	1.70364	6.12e-05	0.00384746		x	x	x		x
Zm00001d032079		￪	1.70312	1.58e-05	0.0018447						x
Zm00001d011461		￪	1.69291	0.000723467	0.0148336	x	x				x	x
Zm00001d044109		￪	1.69168	8.89e-06	0.00136323			x			x			x
Zm00001d043612		￪	1.68991	5.55e-06	0.00103521				x		x		x
Zm00001d029274		￪	1.68664	0.00373897	0.0393187						x			x
Zm00001d034558		￪	1.67966	4.3e-06	0.000884049						x
Zm00001d023522		￪	1.65615	0.000102526	0.00498946			x			x			x
Zm00001d051267	myb166	￪	1.6508	0.000193982	0.0071188	x	x	x	x		x		x
Zm00001d051361		￪	1.6464	0.00051718	0.0123618	x					x			x
Zm00001d039944		￪	1.6427	0.00303544	0.0351517	x					x
Zm00001d010385		￪	1.63735	0.000124833	0.00560333	x					x			x
Zm00001d048789		￪	1.63718	2.61e-05	0.00248169			x	x		x
Zm00001d018819	nced5	￪	1.63078	0.00039662	0.010586	x					x
Zm00001d027500	fsgt1	￪	1.62137	0.000434898	0.0111564	x					x
Zm00001d003757		￪	1.61518	0.000114525	0.00532674						x		x	x
Zm00001d052152	ereb13	￪	1.61469	0.00500594	0.047187	x					x
Zm00001d020408	myb159	￪	1.61195	0.000213953	0.00754152						x		x	x
Zm00001d048185		￪	1.60993	5.75e-05	0.00370776			x	x		x		x
Zm00001d034417	hagtf7	￪	1.60929	0.000100834	0.00492405	x					x
Zm00001d049218		￪	1.60878	4.22e-05	0.00322215						x			x
Zm00001d034836		￪	1.60646	0.000283118	0.00877154	x		x	x		x
Zm00001d008208		￪	1.60633	0.000276	0.00866224			x	x		x
Zm00001d021803		￪	1.60485	1.6e-05	0.00184725			x	x		x
Zm00001d010410	tip4b	￪	1.60203	2.66e-05	0.00249252						x		x
Zm00001d045478		￪	1.60172	0.000545651	0.0126356	x			x		x	x	x	x
Zm00001d042256		￪	1.60128	0.000548503	0.0126356	x	x				x
Zm00001d029349		￪	1.59858	0.00117223	0.0199301	x					x
Zm00001d012591		￪	1.59758	3.32e-06	0.000760384			x			x
Zm00001d036700		￪	1.58935	6.91e-05	0.00407823			x			x
Zm00001d026072		￪	1.58332	0.000247272	0.00827312						x
Zm00001d046961		￪	1.58066	0.000186604	0.00695024	x					x
Zm00001d006688		￪	1.57797	3.59e-06	0.000792221						x			x	Zhang, J et al. 2019. Int J Mol Sci 20:133
Zm00001d037941	ereb69	￪	1.57788	0.00279199	0.0334243	x	x	x	x		x		x	x
Zm00001d021062		￪	1.56877	0.00512599	0.0479191	x					x			x
Zm00001d039492		￪	1.56683	2.13e-05	0.0022358						x		x
Zm00001d051420	dhn3	￪	1.56109	0.000323069	0.00944122	x					x
Zm00001d023664		￪	1.56051	0.00017723	0.0067495	x					x		x	x
Zm00001d003116		￪	1.55971	1.33e-05	0.00165672	x	x				x
Zm00001d043205	ereb147	￪	1.55529	1.7e-06	0.000530723						x
Zm00001d032686		￪	1.55021	0.000378082	0.0102479	x					x
Zm00001d050893	nactf40	￪	1.54917	0.000101929	0.00496895	x					x		x	x
Zm00001d002326	aaa1	￪	1.54771	2.52e-05	0.0024509	x					x		x
Zm00001d018677	hagtf31	￪	1.54348	6.67e-05	0.00399824						x		x
Zm00001d005798	ereb202	￪	1.5421	0.000443095	0.0112952	x		x	x		x
Zm00001d040048		￪	1.53172	0.00371928	0.0392426	x	x	x	x		x
Zm00001d047453		￪	1.53106	0.0021204	0.0284606	x	x		x		x			x
Zm00001d027987	bhlh160	￪	1.52789	0.000606088	0.0133925						x
Zm00001d000224		￪	1.52571	5.26e-05	0.00359516				x		x	x
Zm00001d040784		￪	1.52454	0.000129004	0.00571892	x					x
Zm00001d019936		￪	1.52426	0.000671185	0.0142323	x	x	x	x		x
Zm00001d050339		￪	1.52025	1.23e-05	0.00161979						x
Zm00001d042940		￪	1.51925	0.000141519	0.00596513						x		x
Zm00001d043596		￪	1.51691	0.000491744	0.011945		x		x		x			x
Zm00001d001984		￪	1.51316	0.00414626	0.0418491	x					x
Zm00001d029934	hb78	￪	1.50224	8.08e-07	0.000309928			x	x		x
Zm00001d001852		￪	1.49631	0.00308069	0.0355018	x					x
Zm00001d020317		￪	1.49593	0.00435034	0.0432473	x			x		x			x
Zm00001d012391		￪	1.48957	3.81e-05	0.00309943						x	x
Zm00001d024771		￪	1.48939	0.00345659	0.0377773	x					x
Zm00001d043912		￪	1.48405	4.72e-05	0.00339023	x					x			x
Zm00001d024778	nac1	￪	1.48067	3.18e-05	0.00275271						x		x	x
Zm00001d003125	mgt3	￪	1.47988	7.83e-05	0.00427952	x	x				x
Zm00001d019704		￪	1.47656	0.00218313	0.0289795	x					x
Zm00001d014097		￪	1.47516	1.91e-05	0.00207287	x			x		x
Zm00001d047765		￪	1.47465	1.3e-05	0.00164037			x	x		x		x
Zm00001d048521		￪	1.473	1.91e-05	0.00207287			x			x			x
Zm00001d043782	ereb126	￪	1.46927	0.000246895	0.00827025	x	x				x		x
Zm00001d052660		￪	1.46708	2.78e-06	0.000686828						x	x		x
Zm00001d018122		￪	1.46599	6.14e-05	0.00384746				x		x
Zm00001d020828		￪	1.46484	2.01e-07	0.000135895						x
Zm00001d042637		￪	1.45977	1.02e-05	0.00145823						x
Zm00001d045460		￪	1.45931	0.00163068	0.0244574	x					x
Zm00001d053006		￪	1.45652	0.000714307	0.0147763						x		x
Zm00001d017383	myb26	￪	1.4522	4.59e-05	0.00332114						x
Zm00001d003966		￪	1.45171	0.0012474	0.0205523	x					x
Zm00001d014325		￪	1.44933	5.84e-05	0.00373838	x		x	x		x			x
Zm00001d032745		￪	1.44771	0.00304208	0.0352109	x	x	x			x
Zm00001d029654	tre1	￪	1.44276	0.000293992	0.00893056						x
Zm00001d027355		￪	1.44176	0.00057048	0.012929	x		x	x		x
Zm00001d025099		￪	1.43866	0.00362466	0.0388071	x					x		x
Zm00001d033636		￪	1.43555	0.000100346	0.00492115	x	x	x	x		x
Zm00001d028692		￪	1.4352	3.23e-05	0.00277704						x
Zm00001d022234		￪	1.43417	0.000256102	0.00836129	x					x			x
Zm00001d052122		￪	1.43018	0.00120994	0.020217	x					x		x
Zm00001d039914		￪	1.42628	0.000525713	0.0125145	x					x			x
Zm00001d034643		￪	1.42555	0.00348913	0.0379709	x					x
Zm00001d004220		￪	1.42542	3.39e-05	0.00284226	x	x		x		x		x
Zm00001d004547		￪	1.42339	0.00123504	0.0204676	x					x
Zm00001d028931	gols1	￪	1.42096	2.96e-06	0.000710655	x	x				x			x
Zm00001d014258	alt4	￪	1.41888	0.000315432	0.00930405	x		x			x			x
Zm00001d047814		￪	1.41752	6.5e-06	0.00112802						x
Zm00001d017612		￪	1.41524	0.000494859	0.0119801	x					x
Zm00001d030037		￪	1.41422	0.000483469	0.0118682	x					x		x	x
Zm00001d003035		￪	1.41363	1.88e-05	0.00205023	x					x
Zm00001d002136		￪	1.41037	0.000542319	0.0126356	x		x	x		x
Zm00001d053734		￪	1.40707	0.00548081	0.0499237	x					x
Zm00001d019228		￪	1.40424	0.00169714	0.0249101	x			x		x	x
Zm00001d042826		￪	1.40297	0.000214685	0.00755713						x		x
Zm00001d040190		￪	1.40084	7.03e-06	0.0011873		x	x			x			x
Zm00001d009549		￪	1.39894	0.00400637	0.0410357	x	x	x	x		x	x
Zm00001d026480	iaa44	￪	1.3983	9.32e-05	0.00470239						x
Zm00001d011193		￪	1.39733	0.00149083	0.0232657	x		x	x		x
Zm00001d013836		￪	1.39706	0.000113629	0.00530245	x					x		x
Zm00001d013222		￪	1.39259	0.000378455	0.0102479	x					x
Zm00001d046909	hpt1	￪	1.39016	0.000125631	0.00561324	x					x
Zm00001d034085	phi308707	￪	1.39013	0.000230176	0.00790086	x					x			x
Zm00001d005841	bhlh20	￪	1.38292	0.00305939	0.0353332	x	x	x	x		x
Zm00001d002020		￪	1.38203	2.82e-06	0.000689037						x		x
Zm00001d005766		￪	1.38162	0.00122437	0.020386	x					x
Zm00001d016924	eil8	￪	1.38078	0.00194618	0.0270937	x	x				x	x
Zm00001d009497		￪	1.37686	0.000178378	0.00677849						x
Zm00001d043202		￪	1.3749	0.00500016	0.0471624	x					x
Zm00001d016570		￪	1.37221	0.000373047	0.01023				x		x			x
Zm00001d021943		￪	1.36583	0.000544814	0.0126356	x	x	x	x		x			x
Zm00001d002610		￪	1.36576	8.2e-05	0.00439322	x					x
Zm00001d053262		￪	1.36442	0.00274154	0.0330428	x					x
Zm00001d047981		￪	1.36093	0.000827678	0.0162863						x
Zm00001d043800		￪	1.35903	0.000266191	0.00850494	x		x	x		x			x
Zm00001d004564		￪	1.35188	0.000113938	0.00530811						x		x
Zm00001d051121		￪	1.35029	0.00129779	0.0210797	x					x
Zm00001d047242		￪	1.34647	0.000459298	0.0115218	x	x				x
Zm00001d033998		￪	1.34385	0.00297683	0.0348714	x					x
Zm00001d049870	bhlh165	￪	1.3428	3.66e-05	0.00302389		x				x			x
Zm00001d025654		￪	1.34209	0.000163021	0.00643286	x		x			x		x	x
Zm00001d044259	hsftf3	￪	1.33613	0.00170099	0.0249347	x					x	x	x
Zm00001d008528	myb22	￪	1.33364	0.00024063	0.00812839	x		x	x		x		x	x
Zm00001d012362		￪	1.33295	8.21e-05	0.00439322						x
Zm00001d001862		￪	1.33194	0.00072195	0.0148336	x					x
Zm00001d012128	arr7	￪	1.33186	2.37e-05	0.00237346		x	x	x		x			x
Zm00001d037317		￪	1.33114	0.000449585	0.011389						x
Zm00001d019411		￪	1.32552	0.000540649	0.0126356	x					x			x
Zm00001d029620		￪	1.32503	4.26e-05	0.00322215	x					x
Zm00001d015289		￪	1.32329	0.000347229	0.00981183				x		x		x
Zm00001d029371		￪	1.32085	0.00371824	0.0392426	x		x			x
Zm00001d047685		￪	1.31983	4.26e-05	0.00322215						x
Zm00001d039975		￪	1.317	3.92e-06	0.000841803			x	x		x
Zm00001d024324	ereb54	￪	1.31525	0.00153359	0.023596	x					x
Zm00001d027894		￪	1.3147	0.000368383	0.0101767						x			x
Zm00001d039495		￪	1.31461	0.0022205	0.0292208	x					x
Zm00001d022581		￪	1.31392	0.000291873	0.00890433	x	x				x	x
Zm00001d038880		￪	1.31276	0.000130679	0.00576765	x		x	x		x			x
Zm00001d012069		￪	1.30848	0.000116334	0.00536687			x	x		x
Zm00001d003530		￪	1.30776	0.00232363	0.0300073	x					x		x
Zm00001d034838		￪	1.30539	0.000679053	0.014367	x					x	x
Zm00001d047931		￪	1.30471	0.000506752	0.012147	x	x	x	x		x
Zm00001d017880		￪	1.30394	0.000535769	0.0126356	x	x		x		x
Zm00001d015977		￪	1.30214	0.000430753	0.0111204				x		x		x	x
Zm00001d040285		￪	1.29617	0.00548412	0.0499237	x	x				x			x
Zm00001d002965		￪	1.29503	0.000369699	0.0101767	x					x
Zm00001d012159		￪	1.2939	0.000494878	0.0119801			x	x		x	x		x
Zm00001d010565		￪	1.29008	0.00122596	0.0203886	x					x
Zm00001d002733		￪	1.28813	0.00125439	0.0206129	x	x				x
Zm00001d029922		￪	1.28598	0.00182032	0.0259014	x	x				x			x
Zm00001d015806		￪	1.28522	0.00113148	0.0195573	x					x		x
Zm00001d025474		￪	1.2844	5.98e-06	0.00108689		x	x	x		x
Zm00001d042598		￪	1.28427	4.42e-05	0.00327103						x
Zm00001d016720		￪	1.28137	0.000120299	0.0054436	x					x
Zm00001d020607		￪	1.28115	8.49e-05	0.00445546	x	x	x			x		x	x
Zm00001d034418		￪	1.28016	0.00107852	0.0189943	x					x			x
Zm00001d028601		￪	1.28	6.54e-06	0.00112802		x				x
Zm00001d021779		￪	1.27948	0.000392097	0.0105247	x					x		x
Zm00001d031267		￪	1.27284	2.25e-05	0.00231381						x		x	x
Zm00001d008923		￪	1.27231	0.000561161	0.0127882	x	x	x			x
Zm00001d023979	dgk5	￪	1.27041	3.04e-05	0.00269292						x			x
Zm00001d026060	acs7	￪	1.27005	0.00235705	0.0301915	x	x	x	x		x			x
Zm00001d039377		￪	1.2689	0.00319358	0.0361888	x			x		x
Zm00001d042480		￪	1.26602	2.32e-06	0.000594105						x		x
Zm00001d048925		￪	1.26537	8.35e-05	0.00442665						x
Zm00001d010634	glk25	￪	1.26357	0.00205548	0.0278963	x			x		x
Zm00001d030550		￪	1.26216	0.00045207	0.0114066		x				x
Zm00001d007397		￪	1.26152	0.0011157	0.0194319	x					x		x
Zm00001d045051	znf2	￪	1.25941	0.000809113	0.0160085	x					x
Zm00001d013907		￪	1.25007	0.00361853	0.0387945	x	x	x	x		x		x
Zm00001d014491		￪	1.24931	0.00242401	0.0306071	x	x	x	x		x
Zm00001d016851		￪	1.24841	0.00440699	0.0436575	x	x	x			x			x
Zm00001d046644		￪	1.24461	7.43e-05	0.0042219						x			x
Zm00001d048294		￪	1.24307	0.00397926	0.0408316	x	x	x			x
Zm00001d008730		￪	1.24303	5.28e-05	0.00359721				x		x
Zm00001d042117		￪	1.23351	3.15e-06	0.000738293	x					x	x
Zm00001d022227	fdl1	￪	1.22411	0.000257829	0.0083694	x					x
Zm00001d052903		￪	1.22287	7.55e-05	0.00425002				x		x		x
Zm00001d052375		￪	1.22163	0.000413377	0.0108218	x	x				x
Zm00001d007097		￪	1.22116	2.98e-05	0.00267393						x
Zm00001d045230		￪	1.2199	0.00359531	0.0386974	x		x			x		x	x
Zm00001d020457	myb162	￪	1.21782	9.02e-05	0.0045971		x				x
Zm00001d048162		￪	1.21633	6.23e-05	0.00388589	x	x				x
Zm00001d041567		￪	1.21605	0.000611723	0.01346	x					x
Zm00001d002999	ga2ox2	￪	1.21527	0.00212325	0.0284606	x	x				x
Zm00001d038991		￪	1.21336	8.57e-05	0.00445546						x
Zm00001d048165		￪	1.21147	0.000458255	0.011516	x					x	x	x	x
Zm00001d025967		￪	1.20884	0.0043603	0.043316	x					x
Zm00001d013033		￪	1.20875	0.000556054	0.0127253	x			x		x
Zm00001d038167		￪	1.20733	2.32e-05	0.00236409	x					x	x	x	x
Zm00001d048621	mmp192	￪	1.20704	9.22e-05	0.00468013				x		x
Zm00001d028118		￪	1.20662	0.000254657	0.00836129	x		x			x
Zm00001d042948		￪	1.20598	0.000292641	0.0089086	x		x	x		x		x	x
Zm00001d048901		￪	1.20593	0.00069095	0.014532	x					x
Zm00001d017682	platz11	￪	1.20319	0.00183583	0.0260041	x		x	x		x		x
Zm00001d050323		￪	1.20105	0.00015894	0.00642371		x	x			x
Zm00001d037170		￪	1.20003	5.48e-05	0.0036228	x					x
Zm00001d029056		￪	1.19724	0.00209961	0.0283263	x	x				x
Zm00001d012005		￪	1.19581	0.00257224	0.0317855	x		x			x
Zm00001d026322	cdo244a(crp)	￪	1.19559	0.000981201	0.0180653	x					x			x
Zm00001d032899		￪	1.18828	0.000980565	0.0180653	x					x
Zm00001d013208		￪	1.18335	4.18e-05	0.00322215	x	x				x		x
Zm00001d025360		￪	1.18325	0.0022776	0.0296151		x	x	x		x
Zm00001d045885		￪	1.18174	0.00177255	0.0255542	x		x	x		x		x	x
Zm00001d025932		￪	1.17191	0.00127653	0.0208148	x	x				x			x
Zm00001d030860		￪	1.1714	0.000179026	0.00678146						x
Zm00001d025847		￪	1.17114	0.00372744	0.0392704	x	x	x	x		x		x
Zm00001d008399	nactf118	￪	1.16846	0.00498082	0.0470808	x					x
Zm00001d052458		￪	1.1683	1.75e-05	0.00195043		x		x		x			x
Zm00001d037057		￪	1.16803	3.02e-05	0.00269292		x				x	x		x
Zm00001d020673		￪	1.16626	0.0010371	0.0185879		x	x			x		x	x
Zm00001d020636	ccp2	￪	1.16351	0.000489233	0.0119366			x	x		x		x
Zm00001d031790	bzip49	￪	1.1616	2.34e-05	0.00236907			x	x		x
Zm00001d027991	hb5	￪	1.15687	0.000376912	0.0102479	x					x		x	x
Zm00001d032636		￪	1.15296	0.00393482	0.0405151	x	x				x			x
Zm00001d006016		￪	1.15122	0.000912434	0.0173223	x	x	x	x		x
Zm00001d000071		￪	1.15076	0.000267316	0.00853125				x		x			x
Zm00001d047209		￪	1.14981	0.000620996	0.0135844	x					x			x
Zm00001d015777		￪	1.14526	0.00012518	0.00560333						x
Zm00001d034388		￪	1.14492	0.00529596	0.0490075	x					x
Zm00001d045570		￪	1.14399	0.00454937	0.0444778	x		x	x		x
Zm00001d007420		￪	1.14332	0.00293009	0.0344805						x
Zm00001d026635	alla1	￪	1.14026	0.00218099	0.0289696			x			x	x		x
Zm00001d016764		￪	1.13822	0.000240654	0.00812839						x			x
Zm00001d043361		￪	1.13698	0.000913371	0.0173223				x		x
Zm00001d020496		￪	1.13499	0.000438338	0.0112243						x
Zm00001d045667		￪	1.13496	0.000148102	0.00612529	x					x		x
Zm00001d012338		￪	1.13384	1.34e-05	0.00166237						x		x
Zm00001d017646		￪	1.13275	0.000335155	0.00962452	x					x	x
Zm00001d038881		￪	1.13186	0.000561043	0.0127882	x		x			x			x
Zm00001d050844		￪	1.13177	0.000203116	0.0073132	x		x	x		x
Zm00001d005932		￪	1.13135	0.000546118	0.0126356	x			x		x		x
Zm00001d038267		￪	1.13072	0.000460449	0.0115303	x					x
Zm00001d042013		￪	1.13054	0.00206485	0.0279904						x			x
Zm00001d014611		￪	1.12942	0.00256402	0.0317124	x					x		x
Zm00001d038359		￪	1.12884	0.000134755	0.00585491	x					x			x
Zm00001d003287	nrt4	￪	1.12872	0.000318014	0.00934994						x		x
Zm00001d011563		￪	1.12566	1.15e-05	0.00156735	x	x		x		x
Zm00001d040638		￪	1.12474	0.00267548	0.0325648	x		x			x
Zm00001d048988		￪	1.12462	0.00076711	0.0154008	x					x
Zm00001d007280	zar3	￪	1.12332	0.00417831	0.0420678	x		x	x		x
Zm00001d030133		￪	1.12163	0.0031179	0.0357418	x	x	x	x		x			x
Zm00001d046593	acp1	￪	1.11976	6.45e-06	0.00112802						x
Zm00001d042721	bzip95	￪	1.1188	0.000223683	0.00778691			x			x			x
Zm00001d015239		￪	1.1188	0.000137098	0.00591149						x		x
Zm00001d047913		￪	1.11729	4.63e-06	0.00093636	x					x			x
Zm00001d003671		￪	1.11494	4.02e-06	0.000851432	x					x
Zm00001d040567		￪	1.11205	2.76e-05	0.00255636						x			x
Zm00001d006330		￪	1.10947	0.0001629	0.00643286						x
Zm00001d039226		￪	1.10753	0.00302393	0.0351043	x			x		x
Zm00001d022492		￪	1.10612	0.00121089	0.020221	x					x
Zm00001d013572		￪	1.1059	0.000181875	0.0068619	x					x
Zm00001d010493		￪	1.10453	1.4e-05	0.00170415		x	x	x		x			x
Zm00001d007153		￪	1.10364	0.00129096	0.0209898	x					x	x
Zm00001d047418		￪	1.10259	0.000733781	0.0149346	x			x		x		x
Zm00001d033397		￪	1.10251	0.000485308	0.0118802	x					x			x
Zm00001d038412		￪	1.10218	0.000256261	0.00836129	x					x
Zm00001d042596		￪	1.10191	0.000448587	0.011389	x			x		x
Zm00001d046073		￪	1.09977	5.72e-05	0.00370776		x		x		x
Zm00001d049380		￪	1.09723	8.98e-05	0.00458865	x					x
Zm00001d014608		￪	1.09645	0.000612937	0.01346	x					x	x
Zm00001d011500		￪	1.09059	3.43e-05	0.00286428	x					x
Zm00001d002143	bzip27	￪	1.0875	0.00150774	0.023427	x					x
Zm00001d003275		￪	1.08738	0.000281966	0.00875267				x		x			x
Zm00001d039488		￪	1.08628	0.00055661	0.0127253	x					x			x
Zm00001d021573	sbp29	￪	1.08599	0.00361887	0.0387945				x		x		x
Zm00001d048460		￪	1.08488	0.000619191	0.0135553	x		x			x		x	x
Zm00001d002584		￪	1.08303	0.00235017	0.0301579	x			x		x
Zm00001d038907	ereb162	￪	1.07798	0.00404118	0.041273	x	x				x		x
Zm00001d020969		￪	1.07794	0.0010255	0.0184733						x	x	x
Zm00001d010798		￪	1.07735	0.00328397	0.0366389	x		x	x		x
Zm00001d025825		￪	1.07648	0.00364094	0.0388495	x			x		x			x
Zm00001d014467		￪	1.07627	0.0026462	0.0323899			x	x		x	x
Zm00001d049651		￪	1.07576	0.000824742	0.016261	x	x	x			x			x
Zm00001d019049		￪	1.07559	0.00104146	0.0186185	x					x
Zm00001d002172		￪	1.07107	0.000548212	0.0126356	x	x				x
Zm00001d002283		￪	1.06802	0.000100555	0.00492115	x	x	x	x		x		x
Zm00001d049171		￪	1.06653	5.43e-05	0.00361514	x	x				x		x	x
Zm00001d023715		￪	1.06615	0.00349293	0.0379709	x					x		x
Zm00001d011125		￪	1.06498	0.000174348	0.00667558			x			x		x	x
Zm00001d053684	cts3	￪	1.06496	0.00447498	0.0441001	x		x	x		x		x
Zm00001d025735		￪	1.06403	0.000113266	0.00529423	x		x			x
Zm00001d024937		￪	1.06245	0.00271096	0.0328234	x		x	x		x
Zm00001d021900		￪	1.06091	0.000189895	0.00703727		x				x
Zm00001d007820		￪	1.0609	0.00162474	0.024403						x		x
Zm00001d034615		￪	1.05844	0.00100547	0.0183216	x					x
Zm00001d016950	nactf30	￪	1.05741	0.000379814	0.0102532	x	x	x			x
Zm00001d031677		￪	1.05657	0.00213902	0.0285882	x		x			x		x
Zm00001d017874		￪	1.05613	8.45e-05	0.00445546	x					x			x
Zm00001d009118		￪	1.05177	0.00101268	0.0183825	x	x				x			x
Zm00001d042868		￪	1.05172	0.00183018	0.0260041	x		x			x			x
Zm00001d029209		￪	1.04695	7.89e-05	0.00429042						x		x
Zm00001d040807		￪	1.04652	0.00201445	0.0275809						x
Zm00001d025751		￪	1.04647	0.000170024	0.00659006	x	x				x
Zm00001d006626		￪	1.04624	0.000382789	0.0103237	x			x		x			x
Zm00001d015985	sxd1	￪	1.0455	3.7e-05	0.00304134	x	x	x	x		x	x
Zm00001d027325		￪	1.0455	7.58e-05	0.00426098	x					x		x	x
Zm00001d043727	fps3	￪	1.04504	7.16e-06	0.00119478	x			x		x
Zm00001d051480	mybr58	￪	1.03922	0.00367059	0.0389892	x		x	x		x
Zm00001d009700		￪	1.03652	4.02e-05	0.00318421	x					x			x
Zm00001d011198		￪	1.03637	0.000453843	0.011418	x					x
Zm00001d009171		￪	1.03632	0.00264678	0.0323899	x	x				x			x
Zm00001d040958		￪	1.03491	0.00111957	0.0194754	x					x
Zm00001d029756		￪	1.03218	0.00327359	0.0365806	x					x			x
Zm00001d035166		￪	1.0318	0.00053723	0.0126356						x			x
Zm00001d032620		￪	1.03077	0.000451564	0.0114066	x					x
Zm00001d038753		￪	1.03033	0.00026594	0.00850494			x			x
Zm00001d026253		￪	1.02773	0.00028985	0.00889042						x	x		x
Zm00001d052409		￪	1.02756	3.87e-05	0.00311791	x					x		x
Zm00001d026026		￪	1.02698	0.000858603	0.016708	x		x			x
Zm00001d034732		￪	1.02203	0.000874098	0.0169167	x			x		x		x	x
Zm00001d030557		￪	1.02168	0.00023303	0.00794655	x			x		x		x
Zm00001d037745		￪	1.01647	0.000648982	0.0139281	x					x		x
Zm00001d045610		￪	1.01606	0.00228658	0.029691	x					x	x	x
Zm00001d039575		￪	1.01558	0.003206	0.0362367	x		x	x		x		x
Zm00001d051415		￪	1.01464	0.0010912	0.0191207				x		x
Zm00001d037228	nip2b	￪	1.01408	0.00517713	0.0483255	x					x	x		x
Zm00001d028339		￪	1.01273	0.00365175	0.0389209	x	x		x		x
Zm00001d040954		￪	1.01236	0.0001931	0.00711119	x					x			x
Zm00001d010159	act1	￪	1.01103	0.000581311	0.0130586	x					x
Zm00001d053889	cas1	￪	1.01067	0.000327366	0.00952159	x					x	x
Zm00001d007189		￪	1.01057	0.00205205	0.027889	x	x				x
Zm00001d037939		￪	1.01044	0.00238886	0.0304478	x	x				x			x
Zm00001d011487	idh1	￪	1.0083	9.75e-05	0.00483747	x					x			x
Zm00001d023838		￪	1.00825	0.000574885	0.0130069	x		x			x
Zm00001d016649		￪	1.00798	0.000542572	0.0126356	x					x
Zm00001d006573		￪	1.00508	0.000783676	0.0156251	x					x
Zm00001d043411	ga2ox3	￪	1.00338	0.00151605	0.0234661	x					x
Zm00001d016248	cts4	￪	1.00218	0.000727809	0.0148986	x					x		x
Zm00001d016873	bhlh152	￪	1.00073	0.000363317	0.010096	x					x			x
Zm00001d052843		￪	0.998673	0.00135995	0.0218857	x		x			x
Zm00001d045948		￪	0.99811	0.000106368	0.00507097	x	x				x			x
Zm00001d011426		￪	0.996139	0.000698253	0.0146205	x					x	x
Zm00001d010945		￪	0.995363	0.00147724	0.0230922	x	x				x			x
Zm00001d045036		￪	0.992396	0.000255882	0.00836129	x					x
Zm00001d010961		￪	0.991091	0.000312358	0.0092988			x	x		x
Zm00001d017699		￪	0.990985	0.00490356	0.0467552	x					x
Zm00001d012600		￪	0.990071	0.00508025	0.0476013	x		x			x
Zm00001d040422		￪	0.987701	0.000241135	0.00813495	x	x		x		x
Zm00001d032873		￪	0.986853	0.000343833	0.00976501	x		x	x		x			x
Zm00001d031554		￪	0.984819	0.00387251	0.0401515	x		x	x		x
Zm00001d003833		￪	0.984543	0.000300018	0.0090149						x
Zm00001d028368		￪	0.983684	0.000864241	0.0167832	x					x		x
Zm00001d012015	sbp18	￪	0.983093	0.000703736	0.0146704	x					x
Zm00001d038593		￪	0.983083	0.00310018	0.0356251	x			x		x			x
Zm00001d052905	sbp7	￪	0.981693	0.000982823	0.0180834	x			x		x
Zm00001d015399		￪	0.981535	3.36e-05	0.00283315	x					x
Zm00001d003457		￪	0.980392	0.000162819	0.00643286		x	x	x		x
Zm00001d020612		￪	0.980319	0.000397043	0.0105873			x			x
Zm00001d043117	bzip102	￪	0.978121	0.000255595	0.00836129				x		x			x
Zm00001d038165		￪	0.977815	0.00116616	0.0199075	x					x
Zm00001d004019	sacd5	￪	0.977346	6.36e-05	0.00389581	x	x				x			x
Zm00001d021978		￪	0.97546	0.000115311	0.00533704		x				x		x	x
Zm00001d023507	bzip10	￪	0.97466	7.96e-06	0.00127556	x		x			x	x
Zm00001d044365		￪	0.969832	0.000314853	0.00930405	x	x				x
Zm00001d042932		￪	0.968971	0.000540346	0.0126356				x		x
Zm00001d011144		￪	0.963754	0.000253464	0.00836129	x	x	x	x		x		x	x
Zm00001d020025	bzip9	￪	0.963015	0.00330745	0.0367618	x					x
Zm00001d029754		￪	0.961215	0.0021609	0.0287431	x					x	x		x
Zm00001d009568		￪	0.96101	0.00234497	0.030133	x	x				x		x	x
Zm00001d044159	cyp11	￪	0.959731	0.000170612	0.00659263		x	x			x		x	x
Zm00001d048392		￪	0.953803	0.00533896	0.0492127	x					x
Zm00001d019225		￪	0.950916	0.00321304	0.0362367	x			x		x
Zm00001d017718		￬	-0.950463	0.004145	0.0418491	x	x				x
Zm00001d015519		￬	-0.951122	0.000480613	0.0118265	x					x	x
Zm00001d032224		￬	-0.951199	0.000320697	0.00940931	x			x		x	x	x
Zm00001d022628	myb11	￬	-0.951884	0.000853717	0.0166586	x					x
Zm00001d047570	sirk1	￬	-0.953039	0.00159486	0.0241975	x					x		x
Zm00001d042498		￬	-0.953042	0.0030679	0.0353975	x					x		x
Zm00001d045649		￬	-0.953081	0.0003756	0.0102468	x					x		x
Zm00001d028244		￬	-0.954548	0.000786866	0.0156776	x					x
Zm00001d030530		￬	-0.95534	0.00101893	0.018432	x		x			x		x
Zm00001d042730		￬	-0.956791	0.00254768	0.0316598	x					x
Zm00001d011431		￬	-0.957132	0.00312633	0.0357892	x					x	x
Zm00001d007773		￬	-0.958891	0.00317251	0.0360874	x					x
Zm00001d021298		￬	-0.959719	0.00366939	0.0389892	x					x		x	x
Zm00001d013598		￬	-0.96278	0.000209216	0.00741983	x	x		x		x			x
Zm00001d051157		￬	-0.963079	0.00212153	0.0284606	x					x
Zm00001d034898	ga20ox1	￬	-0.963424	0.000144238	0.00600929	x					x
Zm00001d037371		￬	-0.96386	0.00234825	0.0301469	x					x		x
Zm00001d021706		￬	-0.966991	0.00101931	0.018432	x	x				x		x
Zm00001d029201		￬	-0.970415	0.00143199	0.0226332	x			x		x			x
Zm00001d032948		￬	-0.972145	0.00401213	0.0410798	x					x		x
Zm00001d002789		￬	-0.972177	0.000585147	0.0131239	x	x				x
Zm00001d031822		￬	-0.972416	0.000295951	0.00896128	x					x
Zm00001d037828		￬	-0.972568	0.000577457	0.0130289	x			x		x
Zm00001d053395		￬	-0.973642	0.000410332	0.0107796	x	x				x
Zm00001d035767		￬	-0.974819	0.00274564	0.0330502	x		x	x		x			x
Zm00001d021424	nactf121	￬	-0.975824	0.00141019	0.0224271	x		x	x		x		x	x
Zm00001d007491		￬	-0.976145	0.00267975	0.0325888	x					x			x
Zm00001d013468		￬	-0.976317	0.00289032	0.0342254	x		x	x		x			x
Zm00001d012423		￬	-0.976808	0.00115662	0.0198281	x		x	x		x		x
Zm00001d028751		￬	-0.978301	0.00220107	0.0290856	x		x			x		x
Zm00001d054000		￬	-0.979339	0.000250715	0.00833497	x			x		x			x
Zm00001d051995	pcna2	￬	-0.979712	0.00264279	0.0323899	x			x		x
Zm00001d012917		￬	-0.979812	0.00381904	0.0397247	x					x
Zm00001d016696		￬	-0.979989	0.00183187	0.0260041						x
Zm00001d031149		￬	-0.980632	0.000578414	0.0130289	x					x			x
Zm00001d043325	ptac12	￬	-0.981225	0.000870638	0.0168728	x	x				x	x
Zm00001d016723		￬	-0.981874	0.000788112	0.0156914	x		x			x		x	x
Zm00001d019701		￬	-0.98188	0.00179371	0.0257416	x					x		x
Zm00001d001899	arpp2a-3	￬	-0.982251	0.00129798	0.0210797	x					x
Zm00001d024047		￬	-0.983598	0.00163325	0.0244574	x					x	x		x
Zm00001d002773		￬	-0.98442	0.00143731	0.0226931	x	x				x			x
Zm00001d038979		￬	-0.98463	0.00181641	0.0259014	x		x	x		x		x
Zm00001d016736		￬	-0.985497	0.00194308	0.0270771	x					x
Zm00001d008359		￬	-0.985696	0.00154157	0.0236803	x		x			x			x
Zm00001d044664		￬	-0.986439	0.000343276	0.00975895	x					x
Zm00001d003663		￬	-0.988679	0.000832489	0.016347			x	x		x
Zm00001d015743	bzip61	￬	-0.989504	0.000833343	0.016347	x					x		x	x
Zm00001d040364	gpm465	￬	-0.989747	0.000700033	0.0146254	x					x
Zm00001d006788		￬	-0.990503	0.00449571	0.0442035	x					x
Zm00001d009759		￬	-0.991825	0.00102514	0.0184733	x					x
Zm00001d047516		￬	-0.992696	7.15e-05	0.00413706	x					x		x	x
Zm00001d047911		￬	-0.992993	0.000275916	0.00866224	x		x	x		x		x
Zm00001d012757	gata13	￬	-0.993431	0.00338311	0.0373195	x					x			x
Zm00001d028226		￬	-0.99472	0.00262137	0.0322242	x	x				x
Zm00001d025721		￬	-0.996434	0.000828462	0.0162891	x	x				x			x
Zm00001d028980		￬	-0.996661	0.00157871	0.0240812	x			x		x			x
Zm00001d047446		￬	-1.00088	0.00518289	0.0483255	x					x
Zm00001d007094		￬	-1.00094	0.000197638	0.0072058	x					x
Zm00001d029707	gst38	￬	-1.00151	0.00355077	0.0384073	x		x			x			x
Zm00001d027527		￬	-1.00316	0.000133917	0.00582742	x					x			x
Zm00001d005148		￬	-1.00317	0.000345705	0.00979497	x					x
Zm00001d023283		￬	-1.00438	0.000970969	0.0179689	x		x			x			x
Zm00001d044246		￬	-1.00462	0.004789	0.0460432	x		x			x
Zm00001d025762		￬	-1.00699	0.00198691	0.0272991	x		x			x		x	x
Zm00001d047512		￬	-1.00767	0.00454815	0.0444778	x	x				x			x
Zm00001d010736		￬	-1.01016	0.00401676	0.0410829	x					x		x	x
Zm00001d038366		￬	-1.01367	0.000271974	0.00859292	x	x				x
Zm00001d013554		￬	-1.01479	0.00501013	0.0472094	x					x			x
Zm00001d035020		￬	-1.01483	0.00484622	0.0464046	x					x
Zm00001d017871		￬	-1.01627	0.0018209	0.0259014	x			x		x		x
Zm00001d049071		￬	-1.01784	0.00131467	0.0212655	x					x
Zm00001d026542	glk52	￬	-1.018	0.000375966	0.0102468						x		x	x
Zm00001d045432		￬	-1.01822	0.000832885	0.016347						x		x
Zm00001d003016	pal2	￬	-1.01859	0.00447321	0.0441001	x					x
Zm00001d040733		￬	-1.01965	0.00303149	0.0351345	x					x
Zm00001d020578		￬	-1.021	0.00101529	0.0184062				x		x			x
Zm00001d050241	burp8	￬	-1.02131	0.00233234	0.0300787	x		x	x		x	x		x
Zm00001d019045		￬	-1.0222	0.00186452	0.0262923	x					x
Zm00001d039337		￬	-1.02255	0.00175387	0.0254011	x					x
Zm00001d037727		￬	-1.02394	0.00152139	0.0235072	x			x		x			x
Zm00001d047878	bhlh143	￬	-1.02399	0.00169078	0.0248812	x		x			x		x
Zm00001d021010		￬	-1.02553	0.00153675	0.0236307	x					x	x
Zm00001d038068		￬	-1.02615	0.00299615	0.0349447	x	x	x	x		x
Zm00001d048368		￬	-1.0271	0.000667926	0.014185						x
Zm00001d052804	myb63	￬	-1.028	0.000373366	0.01023		x	x	x		x			x
Zm00001d050079		￬	-1.02801	0.00182018	0.0259014			x			x			x
Zm00001d039967		￬	-1.02809	0.00107757	0.0189943	x		x			x
Zm00001d033919		￬	-1.03076	0.0016346	0.0244574	x		x	x		x
Zm00001d003104		￬	-1.0325	0.00126699	0.0207546	x					x		x
Zm00001d026352		￬	-1.03286	0.00406413	0.0414218	x	x				x
Zm00001d052864		￬	-1.03449	0.00109208	0.0191207	x		x	x		x		x
Zm00001d007154		￬	-1.03471	0.00181591	0.0259014						x
Zm00001d006841		￬	-1.03606	5.89e-05	0.0037532	x		x			x			x
Zm00001d040254	gbptf21	￬	-1.03909	0.00343484	0.0375833	x		x			x			x
Zm00001d051235		￬	-1.04062	0.000205434	0.0073593	x		x	x		x		x
Zm00001d015927		￬	-1.04093	0.000740364	0.0149826	x	x				x			x
Zm00001d015375		￬	-1.04098	0.00187114	0.0263229	x					x
Zm00001d019552		￬	-1.04194	0.00366452	0.0389892	x					x		x
Zm00001d014168		￬	-1.0433	0.00135454	0.021811	x	x				x		x
Zm00001d003399		￬	-1.04437	0.00175329	0.0254011	x					x
Zm00001d005939	bhlh33	￬	-1.04461	0.00256201	0.0317124	x	x				x		x	x
Zm00001d012485		￬	-1.04501	0.000990592	0.0181792	x					x		x
Zm00001d006910		￬	-1.04506	8.47e-05	0.00445546	x	x	x			x			x
Zm00001d011900		￬	-1.04508	3.37e-05	0.00283315	x					x
Zm00001d044841		￬	-1.04804	0.0021087	0.0284084	x		x			x		x
Zm00001d025652		￬	-1.04893	0.000109914	0.00516306	x					x	x
Zm00001d038030		￬	-1.05002	0.00105356	0.0187173	x					x
Zm00001d049583		￬	-1.05122	4.43e-05	0.00327103	x	x				x
Zm00001d045535		￬	-1.05261	0.000702784	0.0146613	x					x
Zm00001d007105	mmp34	￬	-1.05415	0.00256292	0.0317124	x					x
Zm00001d018451		￬	-1.05425	0.00324511	0.0364058	x					x
Zm00001d048181		￬	-1.05502	0.00417142	0.0420181	x		x	x		x
Zm00001d042658		￬	-1.05595	8e-06	0.00127556	x					x		x
Zm00001d036570		￬	-1.05674	0.000639489	0.0138058	x			x		x
Zm00001d041544		￬	-1.05703	0.00342946	0.0375646	x	x	x			x			x
Zm00001d039770		￬	-1.0579	0.00412492	0.0417525	x	x				x	x		x
Zm00001d031638		￬	-1.05906	0.000530609	0.0125663	x					x
Zm00001d038606		￬	-1.06022	0.000956795	0.0178045	x					x			x
Zm00001d039415		￬	-1.06065	0.00289714	0.0342881	x	x	x	x		x
Zm00001d049995	nnr1	￬	-1.06273	0.00246294	0.0309334	x					x	x
Zm00001d042125		￬	-1.0642	0.000118254	0.0053977	x					x
Zm00001d049851		￬	-1.06473	0.000171793	0.00661647		x				x			x
Zm00001d023863		￬	-1.06644	0.00213918	0.0285882	x		x	x		x			x
Zm00001d004048		￬	-1.06655	0.00324813	0.0364109	x					x		x	x
Zm00001d006213		￬	-1.06673	0.00117661	0.0199301	x					x
Zm00001d049000	zhd1	￬	-1.06831	0.000626308	0.0136123	x					x		x
Zm00001d034415	plt5	￬	-1.06895	7.84e-05	0.00427952	x					x			x
Zm00001d016443		￬	-1.06922	0.00273874	0.0330232	x	x		x		x		x
Zm00001d028953		￬	-1.06924	0.00141629	0.0224612						x
Zm00001d044683		￬	-1.07097	0.00101167	0.0183825		x				x
Zm00001d016492		￬	-1.07429	0.00484455	0.0464043	x					x	x
Zm00001d040803		￬	-1.07438	0.000529949	0.0125663	x	x	x			x	x
Zm00001d045567		￬	-1.07449	0.000317826	0.00934994	x	x	x			x	x
Zm00001d018926		￬	-1.07465	6.96e-05	0.00408644	x					x
Zm00001d006511		￬	-1.07602	0.00426137	0.0426769		x	x	x		x	x		x
Zm00001d044111		￬	-1.07733	2.86e-05	0.00262133	x					x
Zm00001d023944		￬	-1.07753	0.000539229	0.0126356	x					x	x
Zm00001d028950		￬	-1.07776	0.0043078	0.0429448	x	x				x			x
Zm00001d038282		￬	-1.07776	0.000227744	0.00785547	x					x		x
Zm00001d048316		￬	-1.07812	0.000405291	0.0107166	x		x	x		x
Zm00001d018322		￬	-1.0782	0.00447149	0.0441001	x	x				x			x
Zm00001d033347	lbd11	￬	-1.07843	0.000718439	0.0148136	x	x		x		x
Zm00001d050412		￬	-1.07956	0.00529275	0.0489938	x					x
Zm00001d008279		￬	-1.08126	0.0026474	0.0323899	x					x
Zm00001d049011		￬	-1.08205	0.000251155	0.00833497	x					x
Zm00001d031665	bhlh173	￬	-1.08206	0.000208612	0.00741323						x		x
Zm00001d021544		￬	-1.08242	0.00503354	0.0473357	x	x				x			x
Zm00001d054010		￬	-1.08389	4.07e-05	0.00318421	x					x	x
Zm00001d003164		￬	-1.08399	2.18e-05	0.00227278	x					x
Zm00001d017454		￬	-1.08486	0.002315	0.0299367	x		x			x	x	x	x
Zm00001d051532		￬	-1.08528	0.00117736	0.0199308	x					x			x
Zm00001d012883	bige1	￬	-1.08621	0.00322857	0.0363496	x		x			x			x
Zm00001d008370	ggps3	￬	-1.08697	0.00493834	0.0468954	x	x		x		x
Zm00001d049789		￬	-1.08736	0.00407926	0.0414827	x					x
Zm00001d045544		￬	-1.08887	0.000182825	0.00688017	x					x	x		x
Zm00001d027363	dpr1	￬	-1.09271	0.000503553	0.012147	x		x			x			x
Zm00001d008669		￬	-1.09272	0.00308535	0.0355122	x					x			x
Zm00001d047787	his2a1	￬	-1.0929	0.00223564	0.0293248	x					x			x
Zm00001d044420		￬	-1.09661	6.19e-05	0.00386531	x	x		x		x
Zm00001d027295	tub1	￬	-1.09923	0.00381958	0.0397247	x		x			x
Zm00001d013295	psa3	￬	-1.09982	0.00070605	0.0146885	x	x				x	x
Zm00001d005814		￬	-1.09986	0.00458134	0.0446672	x	x				x
Zm00001d023692		￬	-1.09988	0.00048043	0.0118265	x			x		x			x
Zm00001d033039		￬	-1.101	0.00506285	0.0475167	x		x	x		x		x
Zm00001d031449	lox13	￬	-1.10286	0.000168083	0.00653598	x		x	x		x		x
Zm00001d013268		￬	-1.10391	0.00064085	0.0138058	x		x	x		x		x
Zm00001d043271		￬	-1.10423	0.00119633	0.0200961	x	x				x			x
Zm00001d043737		￬	-1.10599	0.00271538	0.0328391	x		x			x	x		x
Zm00001d053103		￬	-1.10626	0.00165409	0.0245449	x		x			x			x
Zm00001d031701		￬	-1.10634	0.00143149	0.0226332						x			x
Zm00001d044434		￬	-1.10734	0.00125464	0.0206129	x					x
Zm00001d003085		￬	-1.10883	0.000165874	0.00650024						x
Zm00001d013081	ppr13	￬	-1.10946	0.00187133	0.0263229	x					x	x		x
Zm00001d022237	rnp1	￬	-1.11106	0.00170798	0.0249787	x					x
Zm00001d020681		￬	-1.11135	0.00225961	0.0295164	x					x		x
Zm00001d012707		￬	-1.11178	0.00178945	0.0257064		x				x			x
Zm00001d027684		￬	-1.11201	0.00299638	0.0349447	x	x	x			x			x
Zm00001d010451		￬	-1.11321	0.00504312	0.0473943	x	x	x	x		x	x		x
Zm00001d013654		￬	-1.11397	0.000640021	0.0138058	x		x			x	x		x
Zm00001d021653		￬	-1.11414	0.000137494	0.00591464			x			x	x		x
Zm00001d011274		￬	-1.11471	0.00179073	0.0257119	x					x
Zm00001d039713	tip4c	￬	-1.11746	7.85e-05	0.00427952	x	x				x
Zm00001d037495		￬	-1.12023	8.78e-05	0.00453049				x		x
Zm00001d004439		￬	-1.12179	0.00040132	0.0106631		x				x		x
Zm00001d047753		￬	-1.12278	0.00245359	0.0308569	x					x
Zm00001d051529		￬	-1.12329	0.0021637	0.0287669	x					x			x	Vallabhaneni, R; Wurtzel, E. 2010. Arch Biochem Biophys. 504:112-7
Zm00001d049525		￬	-1.1262	0.000909699	0.0173105						x
Zm00001d027477		￬	-1.1288	0.000402241	0.0106757	x					x		x
Zm00001d003725		￬	-1.12915	0.00104136	0.0186185	x	x	x	x		x			x
Zm00001d040173	irl1	￬	-1.12985	0.00148798	0.0232472	x					x		x
Zm00001d003281		￬	-1.13088	0.000430263	0.0111179	x	x	x			x
Zm00001d003719		￬	-1.13158	0.00122512	0.0203865	x			x		x
Zm00001d022496		￬	-1.13169	6.33e-05	0.00388847	x	x				x			x
Zm00001d026137		￬	-1.13175	0.00118048	0.0199599	x					x	x
Zm00001d010463		￬	-1.13384	0.000368744	0.0101767	x					x			x
Zm00001d040399		￬	-1.13597	0.00290711	0.0343669	x					x		x
Zm00001d002026		￬	-1.13619	9.31e-05	0.00470239	x	x		x		x		x	x
Zm00001d043723		￬	-1.13939	0.000420199	0.0109275	x		x	x		x		x	x
Zm00001d032114		￬	-1.14049	0.00166535	0.0246862	x		x			x		x	x
Zm00001d007272		￬	-1.14521	0.00378314	0.0395633	x					x
Zm00001d022191		￬	-1.14574	0.00255336	0.0316903	x					x
Zm00001d028742	fad8	￬	-1.14973	0.000314183	0.00930405				x		x
Zm00001d027335	thx18	￬	-1.15037	0.000956932	0.0178045	x		x	x		x	x
Zm00001d020537	o5	￬	-1.15258	7.65e-05	0.00427463						x			x
Zm00001d015348		￬	-1.15339	0.000182844	0.00688017	x	x		x		x		x
Zm00001d045661	col4	￬	-1.15369	0.0042942	0.0428706	x	x				x
Zm00001d038833		￬	-1.15533	0.0023052	0.0298644	x			x		x			x
Zm00001d023419		￬	-1.15718	0.00499286	0.0471249	x					x			x
Zm00001d014459		￬	-1.16019	0.00144337	0.0227634	x					x		x	x
Zm00001d010038		￬	-1.16022	1.58e-05	0.0018447	x					x			x
Zm00001d051591	his2b5	￬	-1.16031	0.00265581	0.0324329	x					x
Zm00001d044640		￬	-1.16089	7.21e-05	0.00415104						x			x
Zm00001d006278		￬	-1.16158	0.00211939	0.0284606	x					x
Zm00001d004894	ssu2	￬	-1.16394	0.00193679	0.0270294	x			x		x		x
Zm00001d031270	myb164	￬	-1.16566	0.00164271	0.0244574	x		x			x
Zm00001d004650		￬	-1.16612	0.000991755	0.0181888	x	x	x			x		x	x
Zm00001d051143		￬	-1.16623	0.00330518	0.03676	x			x		x
Zm00001d035689	ccp5	￬	-1.16701	0.000660213	0.0140843	x					x		x	x
Zm00001d025435		￬	-1.16716	0.00249534	0.0311884	x			x		x
Zm00001d014366		￬	-1.16742	0.000537644	0.0126356	x			x		x
Zm00001d007188	eil2	￬	-1.16968	0.00451538	0.0442981	x					x
Zm00001d037682		￬	-1.17083	0.00105227	0.0187062	x					x		x
Zm00001d017531		￬	-1.17085	0.001961	0.0271329	x					x
Zm00001d030346		￬	-1.17121	0.00340891	0.0374584	x	x				x	x		x
Zm00001d045538		￬	-1.17346	5.69e-05	0.00370245						x
Zm00001d008595		￬	-1.17536	0.000147307	0.00610131	x					x			x
Zm00001d039648		￬	-1.1759	0.00510481	0.0477526	x					x
Zm00001d008957		￬	-1.17712	0.000232702	0.00794655	x		x	x		x		x
Zm00001d006651	tua5	￬	-1.179	0.00113065	0.0195573	x			x		x	x		x
Zm00001d028689		￬	-1.18056	4.31e-05	0.00322835	x					x			x
Zm00001d018609		￬	-1.18085	0.00019334	0.00711119						x
Zm00001d037871		￬	-1.18142	2.7e-05	0.00252049	x					x		x
Zm00001d016059		￬	-1.1816	0.000716161	0.0147989	x					x
Zm00001d001812	raf1	￬	-1.18494	0.000100602	0.00492115	x	x				x
Zm00001d037480	aga2	￬	-1.18541	0.000376357	0.0102476	x	x				x		x	x
Zm00001d046923		￬	-1.18564	7.69e-05	0.00427463	x	x	x			x			x
Zm00001d007351		￬	-1.18576	0.000448344	0.011389	x	x				x
Zm00001d022259	myb23	￬	-1.18616	0.00042526	0.0110174	x					x
Zm00001d003429	gpa1	￬	-1.18665	0.00210868	0.0284084	x					x
Zm00001d014419		￬	-1.18716	3.36e-05	0.00283315	x					x			x
Zm00001d016185	peroxidase52	￬	-1.18945	0.00120156	0.0201244	x		x	x		x	x	x	x
Zm00001d016683		￬	-1.1908	0.000335066	0.00962452	x					x	x	x
Zm00001d051543		￬	-1.19221	0.000333853	0.00961633						x
Zm00001d037328		￬	-1.19248	0.0011227	0.0194914	x					x			x
Zm00001d018080		￬	-1.19563	0.00299663	0.0349447	x		x			x
Zm00001d051130		￬	-1.1963	6.79e-05	0.00404877	x	x		x		x		x
Zm00001d007832		￬	-1.19814	0.000250603	0.00833497	x			x		x			x
Zm00001d050156		￬	-1.19848	0.000680992	0.0143758	x					x
Zm00001d002788		￬	-1.19853	0.00413955	0.041826	x					x
Zm00001d031659	pdh2	￬	-1.20042	7.71e-05	0.00427463				x		x	x
Zm00001d015569		￬	-1.20055	0.000378109	0.0102479						x		x
Zm00001d014032		￬	-1.20183	0.00137588	0.022032	x					x
Zm00001d043420	bzip53	￬	-1.20201	0.000479818	0.0118265	x		x			x	x	x	x
Zm00001d018065	mterf18	￬	-1.20234	0.000478018	0.0118139	x					x
Zm00001d032419		￬	-1.20416	0.000406457	0.0107274	x	x				x		x
Zm00001d053099		￬	-1.20487	0.0016147	0.0243277	x					x			x
Zm00001d027411		￬	-1.20721	0.00181537	0.0259014	x					x	x
Zm00001d012231		￬	-1.20902	1.86e-05	0.00203844	x	x	x			x
Zm00001d038220		￬	-1.20911	0.00527998	0.0489075	x					x
Zm00001d051206		￬	-1.20992	6.61e-05	0.0039716	x		x	x		x		x	x
Zm00001d032922	id1	￬	-1.21196	0.000157239	0.00636402	x	x	x	x		x	x
Zm00001d029897		￬	-1.212	0.00299752	0.0349447	x	x				x			x
Zm00001d032576		￬	-1.21201	0.00037107	0.0102015	x		x	x		x			x
Zm00001d047186		￬	-1.21229	0.000406186	0.0107274		x	x	x		x
Zm00001d017540	ggps4	￬	-1.21287	1.03e-05	0.00145948	x					x			x
Zm00001d010179		￬	-1.21296	0.00166031	0.0246243	x		x			x	x
Zm00001d032728		￬	-1.21307	0.00124704	0.0205523	x					x		x	x
Zm00001d006358		￬	-1.21323	0.000358107	0.0100002	x					x			x
Zm00001d021300		￬	-1.21483	0.00113473	0.0195758	x					x
Zm00001d009134		￬	-1.21571	0.00139494	0.022222	x	x	x	x		x			x
Zm00001d046357		￬	-1.21728	0.000256307	0.00836129	x					x	x		x
Zm00001d029075		￬	-1.21771	8.33e-05	0.0044247						x
Zm00001d051478		￬	-1.22377	0.000374276	0.0102302	x					x			x
Zm00001d048451		￬	-1.22595	0.00141296	0.0224459	x			x		x
Zm00001d025901		￬	-1.22596	0.0017004	0.0249347						x
Zm00001d038761	wrky100	￬	-1.22638	0.00342625	0.0375646	x					x
Zm00001d006879		￬	-1.22866	0.000185323	0.00692751						x
Zm00001d035987		￬	-1.23157	0.00023148	0.00793184	x					x
Zm00001d052918		￬	-1.23243	0.00112684	0.0195182	x	x				x
Zm00001d025406		￬	-1.23315	0.000298486	0.00900723	x					x
Zm00001d002772		￬	-1.23714	0.000118524	0.0053977	x					x
Zm00001d005624		￬	-1.23966	0.000141384	0.00596513	x					x
Zm00001d011834		￬	-1.24324	0.00052701	0.0125229	x					x		x
Zm00001d053139		￬	-1.24344	0.0026197	0.0322203	x					x			x
Zm00001d036046		￬	-1.24554	0.003152	0.0359584	x			x		x			x
Zm00001d029580		￬	-1.2456	0.00188155	0.0264536	x	x				x			x
Zm00001d015407	glk53	￬	-1.24854	7.27e-05	0.00415914	x			x		x	x	x
Zm00001d026268		￬	-1.25021	0.00414512	0.0418491	x	x				x
Zm00001d043291		￬	-1.25044	0.00452554	0.0443534	x					x
Zm00001d025241		￬	-1.25079	7.23e-05	0.0041513	x		x	x		x		x	x
Zm00001d034416		￬	-1.25416	0.000254054	0.00836129		x				x			x
Zm00001d023929	oxmt1	￬	-1.25455	0.0019112	0.0267379	x		x	x		x	x		x
Zm00001d046330		￬	-1.25667	0.000145645	0.00605899	x	x				x		x
Zm00001d032688		￬	-1.25737	1.42e-05	0.00171126						x		x
Zm00001d030361		￬	-1.26031	0.00191857	0.0268147	x					x		x
Zm00001d019560	expb4	￬	-1.2607	0.0001365	0.00589464	x					x		x
Zm00001d013814		￬	-1.26135	0.000415054	0.0108235	x					x
Zm00001d047573		￬	-1.26181	0.000125212	0.00560333	x		x	x		x
Zm00001d017530		￬	-1.26241	0.00124555	0.0205523	x			x		x	x
Zm00001d053004	aic2	￬	-1.26369	0.000327556	0.00952159	x					x			x
Zm00001d012438		￬	-1.2641	0.000242179	0.00816047	x					x
Zm00001d037974		￬	-1.26453	0.00317603	0.0360874	x	x	x	x		x
Zm00001d049831		￬	-1.26638	0.00109102	0.0191207	x					x
Zm00001d009425		￬	-1.27122	0.00106565	0.0188612			x	x		x
Zm00001d034984	nactf62	￬	-1.27402	0.0011926	0.0200748	x					x			x
Zm00001d051699		￬	-1.27586	0.00246668	0.0309393	x					x		x
Zm00001d012167		￬	-1.28441	0.000296489	0.00896801	x					x
Zm00001d031253	dct2	￬	-1.28832	0.000731103	0.0149122	x					x
Zm00001d004635		￬	-1.28866	4.76e-06	0.000951971	x					x
Zm00001d016036		￬	-1.28903	2.47e-05	0.00242411				x		x			x
Zm00001d002860		￬	-1.294	0.00175132	0.0254011	x					x		x
Zm00001d012535		￬	-1.29401	0.00158717	0.0241546	x					x		x	x
Zm00001d012408		￬	-1.29735	0.000253783	0.00836129	x			x		x		x
Zm00001d040441		￬	-1.30038	8.74e-05	0.00452515						x
Zm00001d044605		￬	-1.30076	0.000468099	0.0116295	x					x	x
Zm00001d037337		￬	-1.3044	1.41e-05	0.00171042	x					x			x
Zm00001d052104		￬	-1.30488	0.00379333	0.0396149	x			x		x			x
Zm00001d046289		￬	-1.30744	0.00273764	0.0330232	x					x	x
Zm00001d029970	mmp39	￬	-1.3114	0.000167555	0.00653003	x					x
Zm00001d013022		￬	-1.31363	0.000168168	0.00653598	x		x			x
Zm00001d004513		￬	-1.3154	0.000414864	0.0108235	x					x	x
Zm00001d039101	c3h3	￬	-1.31619	0.00163579	0.0244574	x					x
Zm00001d043938		￬	-1.31861	0.000309832	0.00924348	x		x	x		x		x	x
Zm00001d008930		￬	-1.32225	0.000118454	0.0053977						x		x	x
Zm00001d034818		￬	-1.32555	0.00167326	0.0247723	x					x		x	x
Zm00001d043728		￬	-1.33229	0.00113537	0.0195758	x		x	x		x		x
Zm00001d009097		￬	-1.3363	0.000269305	0.00854667	x		x	x		x		x	x
Zm00001d009698	wrky20	￬	-1.33689	0.00120574	0.0201705	x					x			x
Zm00001d051001	gpc3	￬	-1.33722	0.000723279	0.0148336	x					x		x
Zm00001d015129		￬	-1.33911	8.43e-05	0.00445546	x					x
Zm00001d034298	bhlh47	￬	-1.34129	2.38e-05	0.00237346			x			x		x	x
Zm00001d052223		￬	-1.34363	0.00410058	0.0415962	x	x				x
Zm00001d051923		￬	-1.34398	0.000827748	0.0162863	x					x
Zm00001d032480		￬	-1.34726	0.000257664	0.0083694	x		x			x	x		x
Zm00001d044465		￬	-1.34767	6.28e-06	0.00112696				x		x			x
Zm00001d019303		￬	-1.34999	0.00443968	0.0438742	x					x
Zm00001d032651		￬	-1.35238	2.28e-05	0.00233529	x	x		x		x			x
Zm00001d049722		￬	-1.35353	0.00538852	0.0495088						x			x
Zm00001d004855		￬	-1.35621	0.000193495	0.00711119	x					x
Zm00001d053220	myb42	￬	-1.36167	0.00159159	0.0241608		x				x			x
Zm00001d010304		￬	-1.36265	0.00381599	0.0397247	x					x		x	x
Zm00001d019398		￬	-1.36321	0.0004142	0.0108218	x					x
Zm00001d051389		￬	-1.36723	0.000259205	0.00839517	x	x	x	x		x
Zm00001d017706		￬	-1.36941	0.00119365	0.0200748	x					x	x		x
Zm00001d034067		￬	-1.37049	0.000666154	0.014185						x
Zm00001d052586		￬	-1.37107	0.000208012	0.00741323		x				x
Zm00001d031893	hct12	￬	-1.37145	0.000246369	0.00826241	x		x	x		x
Zm00001d030317		￬	-1.37435	0.000330387	0.00954923	x	x				x	x	x	x
Zm00001d006950		￬	-1.37592	3.83e-05	0.00310747	x					x
Zm00001d002806	dbb2	￬	-1.37663	0.000142147	0.00596513						x
Zm00001d043101		￬	-1.3789	5.92e-05	0.00376807	x			x		x	x
Zm00001d002934	nactf103	￬	-1.38113	0.000547234	0.0126356	x	x				x
Zm00001d034715	raf2	￬	-1.38153	2.25e-05	0.00231381						x			x
Zm00001d006875	alt10	￬	-1.38388	0.000186779	0.00695024	x					x
Zm00001d016154	bzip89	￬	-1.38408	0.000477536	0.0118122						x
Zm00001d052741		￬	-1.38586	0.000764819	0.0153788	x		x	x		x	x	x	x
Zm00001d036877		￬	-1.38673	0.00108836	0.0191083	x		x			x
Zm00001d004480		￬	-1.38809	4.43e-05	0.00327103			x	x		x			x
Zm00001d016721		￬	-1.38857	0.000532233	0.012584						x
Zm00001d035300		￬	-1.38967	0.000714545	0.0147763	x			x		x
Zm00001d004614		￬	-1.39201	8.83e-05	0.00453406	x					x			x
Zm00001d023932	myb109	￬	-1.39433	0.00113526	0.0195758	x					x		x
Zm00001d009060		￬	-1.39461	0.000106526	0.00507097	x					x		x	x
Zm00001d032443		￬	-1.39478	0.000328542	0.00952159	x					x			x
Zm00001d017333		￬	-1.39485	5.91e-06	0.00108689	x	x		x		x			x
Zm00001d043943		￬	-1.39624	0.000979299	0.0180653	x					x	x
Zm00001d039579	phd34	￬	-1.39681	0.000105602	0.00506959	x					x		x
Zm00001d015759	ereb46	￬	-1.3983	0.00211951	0.0284606	x					x
Zm00001d024166		￬	-1.39839	0.00271291	0.0328234	x	x		x		x		x
Zm00001d038153		￬	-1.39934	0.0015306	0.0235756	x					x		x	x
Zm00001d052636		￬	-1.39997	0.00159012	0.0241608	x					x	x	x
Zm00001d015008		￬	-1.40545	0.000118109	0.0053977						x		x
Zm00001d012953		￬	-1.40573	0.00213101	0.0285194	x		x	x		x
Zm00001d013231	ben1	￬	-1.40627	0.000893007	0.0171192	x			x		x		x
Zm00001d017822		￬	-1.40658	0.00119806	0.0201014	x					x
Zm00001d013873		￬	-1.41035	0.000112399	0.00527105	x					x	x	x
Zm00001d038794		￬	-1.41251	7.86e-05	0.00427952	x					x			x
Zm00001d012096		￬	-1.41346	0.00201637	0.0275809	x	x		x		x	x
Zm00001d041476		￬	-1.41646	2.19e-05	0.00227278						x
Zm00001d002342		￬	-1.41804	0.000937254	0.0176128	x					x	x
Zm00001d052054		￬	-1.42149	0.000255635	0.00836129	x					x	x	x
Zm00001d003463		￬	-1.42436	6.13e-05	0.00384746						x
Zm00001d021667		￬	-1.42488	1.75e-05	0.00195043		x	x	x		x			x
Zm00001d039790		￬	-1.42563	0.000657197	0.0140618	x					x			x
Zm00001d042050		￬	-1.4262	0.00231014	0.0299147	x		x			x		x	x
Zm00001d003161		￬	-1.42675	1.28e-05	0.00163412	x					x	x	x
Zm00001d046223	hb21	￬	-1.42899	0.000121403	0.00546737	x		x			x		x
Zm00001d044970		￬	-1.42912	0.000595181	0.013286			x	x		x		x	x
Zm00001d025586		￬	-1.42935	0.000472541	0.0117296	x					x		x
Zm00001d007896		￬	-1.43043	1.13e-05	0.00154744	x					x	x
Zm00001d017069		￬	-1.43508	1.68e-05	0.00190952						x
Zm00001d026068		￬	-1.43599	0.000142758	0.00596513	x		x	x		x		x	x
Zm00001d018638		￬	-1.4378	0.00154807	0.0237572	x			x		x	x	x
Zm00001d038969		￬	-1.43888	0.00144971	0.0228507	x		x	x		x
Zm00001d002074		￬	-1.43948	0.000623491	0.0135975	x					x
Zm00001d007935		￬	-1.44219	0.00251683	0.0313741	x			x		x		x
Zm00001d020732		￬	-1.44255	0.0004337	0.0111512	x					x
Zm00001d051872	pip1e	￬	-1.44451	0.00367461	0.0390034	x	x	x			x			x	Ma, HZ et al. 2018. Plant Physiol pp.doi: 10.1104/pp.18.00436
Zm00001d042953		￬	-1.44595	4.45e-05	0.00327103	x			x		x			x
Zm00001d014496		￬	-1.44813	5.44e-06	0.00102216	x					x
Zm00001d038742		￬	-1.45023	0.00332526	0.0368609	x					x
Zm00001d013410		￬	-1.45158	0.00027058	0.00856795	x					x		x	x
Zm00001d043929		￬	-1.45802	0.000190911	0.00706195	x			x		x			x
Zm00001d020147		￬	-1.46029	0.000227867	0.00785547				x		x
Zm00001d028680		￬	-1.46376	0.00208928	0.0282176	x		x	x		x	x
Zm00001d037248		￬	-1.46405	0.000131896	0.00578476	x					x
Zm00001d033790		￬	-1.46951	3.79e-05	0.00309693				x		x
Zm00001d020651		￬	-1.46999	0.000864839	0.0167833	x					x
Zm00001d006282		￬	-1.47035	2.46e-05	0.00242411						x
Zm00001d020610		￬	-1.47394	0.00443935	0.0438742	x		x			x			x
Zm00001d027313		￬	-1.47447	0.00424063	0.0425442	x	x		x		x
Zm00001d039081		￬	-1.47676	0.000729496	0.0149085			x	x		x	x
Zm00001d017528		￬	-1.4824	6.84e-05	0.00406921	x					x		x
Zm00001d010422		￬	-1.48477	0.000678783	0.014367			x			x		x	x
Zm00001d016522		￬	-1.48889	0.00420445	0.0422472	x					x			x
Zm00001d038135		￬	-1.48941	0.000736257	0.0149461	x					x		x	x
Zm00001d013038		￬	-1.49027	0.000283296	0.00877154	x					x	x		x
Zm00001d050346		￬	-1.49245	4.09e-05	0.00318421						x
Zm00001d013979		￬	-1.49332	2.1e-05	0.00221918	x	x		x		x			x
Zm00001d043458		￬	-1.49382	0.00310295	0.035628	x					x
Zm00001d026530		￬	-1.49833	0.000445132	0.0113267			x			x		x
Zm00001d032961	an1	￬	-1.50181	0.00332595	0.0368609	x			x		x
Zm00001d009081		￬	-1.50193	0.000495753	0.0119911	x					x			x
Zm00001d053020	tcptf2	￬	-1.5031	0.0010434	0.0186185	x					x		x
Zm00001d037688		￬	-1.50316	0.000176982	0.00674912	x					x
Zm00001d044132		￬	-1.50335	0.00343174	0.0375646	x	x	x			x		x
Zm00001d053015		￬	-1.50381	0.00157256	0.0240405	x					x
Zm00001d037494		￬	-1.50472	0.00108904	0.0191083	x	x				x		x
Zm00001d028510		￬	-1.50629	1.05e-05	0.00147967						x	x
Zm00001d044254	gar1	￬	-1.50639	0.00376188	0.0394282	x		x			x	x
Zm00001d020977		￬	-1.50793	0.00202382	0.0276498	x	x				x
Zm00001d028714		￬	-1.51036	0.000306154	0.00916265	x					x
Zm00001d011787		￬	-1.51109	0.000114948	0.00532895	x					x		x
Zm00001d013144		￬	-1.51123	0.000155418	0.00629933	x		x	x		x
Zm00001d004013		￬	-1.51388	0.000224336	0.00779053	x			x		x
Zm00001d032024	myb38	￬	-1.51535	0.00137691	0.022032	x					x
Zm00001d007345		￬	-1.51577	0.000295605	0.00896037	x		x	x		x
Zm00001d024717		￬	-1.51864	0.000668925	0.014195	x	x				x	x		x
Zm00001d026594	crr2	￬	-1.53019	5.87e-05	0.00375048						x			x
Zm00001d026415		￬	-1.53189	4.25e-05	0.00322215	x		x			x		x
Zm00001d016756		￬	-1.53198	0.000721679	0.0148336						x		x	x
Zm00001d031421		￬	-1.53333	0.000524452	0.0125139	x					x
Zm00001d044538	myb27	￬	-1.53343	0.00117266	0.0199301	x	x		x		x
Zm00001d023781		￬	-1.55574	6.3e-05	0.00388847						x
Zm00001d020540	ereb143	￬	-1.56574	0.000743128	0.0150082	x					x			x
Zm00001d046510		￬	-1.57219	0.000643187	0.0138246	x		x			x
Zm00001d022374		￬	-1.57871	1.01e-06	0.00036227						x	x
Zm00001d005905		￬	-1.58227	0.000119267	0.00542284	x	x				x
Zm00001d016741		￬	-1.58254	0.000245247	0.00824424	x					x
Zm00001d042723		￬	-1.58532	0.000103836	0.00502737	x	x		x		x			x
Zm00001d022085		￬	-1.58948	4.83e-05	0.0034066	x					x		x
Zm00001d042307		￬	-1.59475	0.00428881	0.0428609	x					x
Zm00001d051110		￬	-1.59495	1.11e-05	0.00153707						x
Zm00001d021016		￬	-1.59507	4.45e-05	0.00327103	x					x
Zm00001d010366		￬	-1.59782	4.65e-06	0.00093636	x					x		x
Zm00001d038352		￬	-1.59819	0.00547641	0.0499237	x					x
Zm00001d047252		￬	-1.59823	0.00081871	0.0161758		x				x		x
Zm00001d048353	gst13	￬	-1.59993	7.75e-05	0.00427881	x		x			x	x	x
Zm00001d034692		￬	-1.60282	7.68e-05	0.00427463		x	x	x		x			x
Zm00001d025759		￬	-1.60354	0.00359896	0.0387219	x					x		x
Zm00001d032613		￬	-1.6039	7.7e-05	0.00427463	x					x
Zm00001d012274	hct10	￬	-1.60392	2.47e-05	0.00242411		x	x			x			x
Zm00001d015131		￬	-1.60559	0.00286183	0.0339994	x		x	x		x		x	x
Zm00001d049220		￬	-1.60587	0.000299837	0.0090149	x	x		x		x		x	x
Zm00001d044074	c3h21	￬	-1.6088	0.000625426	0.0136078	x					x
Zm00001d033446		￬	-1.60922	0.00337995	0.037299	x			x		x			x
Zm00001d000222	sweet1a	￬	-1.62247	6.39e-05	0.00389945			x	x		x
Zm00001d002094		￬	-1.62399	0.000379793	0.0102532	x					x		x
Zm00001d019450		￬	-1.62709	0.000379092	0.0102532	x					x
Zm00001d010755	trps1	￬	-1.62869	5.45e-05	0.0036165		x				x
Zm00001d049688		￬	-1.62944	0.00524303	0.0486765	x					x			x
Zm00001d052883		￬	-1.63995	0.00103241	0.0185468	x					x			x
Zm00001d047944		￬	-1.64386	0.000294983	0.00895108						x
Zm00001d040188		￬	-1.64573	0.000335954	0.00962798	x	x	x			x
Zm00001d028793		￬	-1.64737	7.14e-05	0.00413706		x	x			x		x	x
Zm00001d042260		￬	-1.65112	0.00158777	0.0241546	x					x
Zm00001d052324		￬	-1.65115	0.000224102	0.00779053	x			x		x	x
Zm00001d029195	tps8	￬	-1.65359	0.00240386	0.0305178	x					x			x
Zm00001d010275	tub2	￬	-1.65503	2.83e-05	0.00260786	x			x		x		x	x
Zm00001d010434		￬	-1.65919	4.54e-05	0.00331145	x	x	x	x		x
Zm00001d045685		￬	-1.66919	3.8e-05	0.00309943			x			x		x
Zm00001d032405		￬	-1.67088	0.00142928	0.022622	x	x	x			x
Zm00001d027330		￬	-1.67707	9.74e-05	0.00483747	x	x				x	x		x
Zm00001d025343		￬	-1.68485	1.32e-05	0.00165672	x			x		x		x
Zm00001d009775		￬	-1.68489	0.00537147	0.0494253	x			x		x			x
Zm00001d052125		￬	-1.68669	8.54e-05	0.00445546	x					x
Zm00001d037468	phos4	￬	-1.69226	0.00547455	0.0499237	x					x
Zm00001d045304		￬	-1.69246	2.62e-05	0.00248169						x			x
Zm00001d017994		￬	-1.69483	0.000202661	0.00730609						x
Zm00001d008329		￬	-1.69506	0.000387692	0.0104347	x		x	x		x			x
Zm00001d037342		￬	-1.69624	0.000228809	0.00787835	x					x		x
Zm00001d027645		￬	-1.70047	0.00016674	0.0065162	x					x
Zm00001d047253	sus1	￬	-1.70256	3.62e-05	0.00300433						x		x
Zm00001d014648		￬	-1.72733	0.00497092	0.0470587	x		x	x		x			x
Zm00001d017041		￬	-1.73269	0.00329001	0.0366775	x					x	x		x
Zm00001d034017		￬	-1.7417	2.93e-05	0.00265761						x
Zm00001d008187		￬	-1.74414	0.000320289	0.00940708	x		x	x		x			x
Zm00001d033466	lbd12	￬	-1.74447	0.00271127	0.0328234	x					x			x
Zm00001d011878		￬	-1.7458	7.47e-05	0.0042219						x
Zm00001d045579		￬	-1.74585	6.41e-06	0.00112802						x
Zm00001d036237		￬	-1.74736	0.00328338	0.0366389	x		x			x			x
Zm00001d026161		￬	-1.75075	0.00102459	0.0184733	x					x			x
Zm00001d023887		￬	-1.75179	3.79e-06	0.000827566		x				x
Zm00001d024786		￬	-1.75339	0.000216489	0.00761119				x		x
Zm00001d045721		￬	-1.76338	4.78e-05	0.0034066						x		x
Zm00001d006054		￬	-1.76538	4.23e-05	0.00322215	x			x		x	x		x
Zm00001d032285		￬	-1.76684	0.00349221	0.0379709	x					x
Zm00001d033284		￬	-1.77316	0.00209925	0.0283263	x	x				x
Zm00001d043520		￬	-1.77369	9.53e-06	0.00140919			x	x		x
Zm00001d014492		￬	-1.77488	2.74e-05	0.00255298	x	x		x		x	x
Zm00001d045048	pme2	￬	-1.77509	2.86e-05	0.00262133	x					x		x
Zm00001d052906		￬	-1.77795	0.000117451	0.0053977		x				x
Zm00001d029243		￬	-1.78356	4.82e-05	0.0034066	x	x	x	x		x
Zm00001d017782	mybr78	￬	-1.79432	0.00159052	0.0241608	x					x			x
Zm00001d028754		￬	-1.79516	0.000976441	0.0180245			x	x		x
Zm00001d009373		￬	-1.79708	1.19e-05	0.00159186						x	x		x
Zm00001d012719	bzip20	￬	-1.80299	8.29e-06	0.00129943		x				x
Zm00001d046642		￬	-1.80542	9.14e-06	0.00137677		x				x
Zm00001d016625		￬	-1.8079	1.65e-05	0.00189456						x		x	x
Zm00001d038645		￬	-1.81261	0.00047715	0.0118122	x					x
Zm00001d007228		￬	-1.8235	0.00254867	0.0316598	x	x				x			x
Zm00001d020605		￬	-1.82431	0.00117516	0.0199301						x		x
Zm00001d034143	hagtf6	￬	-1.82439	0.000222494	0.007764						x
Zm00001d036991		￬	-1.83535	0.00343087	0.0375646	x					x
Zm00001d019855		￬	-1.83804	0.000166513	0.0065162	x					x		x
Zm00001d004451		￬	-1.8534	3.74e-05	0.00306386						x
Zm00001d048649	csu221	￬	-1.85645	0.00102183	0.0184562	x	x				x		x
Zm00001d038726		￬	-1.85755	0.00321471	0.0362367	x					x
Zm00001d023242		￬	-1.8613	2.95e-05	0.00265934						x
Zm00001d042611	ga20ox3	￬	-1.86591	0.000106538	0.00507097						x
Zm00001d043579		￬	-1.87033	5.43e-05	0.00361514	x					x
Zm00001d005010		￬	-1.87986	0.00027771	0.00866799	x					x
Zm00001d043242		￬	-1.88349	4.08e-05	0.00318421	x					x		x
Zm00001d010813		￬	-1.88435	0.00404044	0.041273	x	x	x	x		x
Zm00001d039496	myb131	￬	-1.88845	0.000940577	0.0176612	x					x
Zm00001d050039	nactf92	￬	-1.89161	9.97e-05	0.0049126	x					x		x	x
Zm00001d026486	ereb190	￬	-1.8965	0.00032887	0.00952159						x			x
Zm00001d033024		￬	-1.90891	0.0017698	0.0255276						x		x
Zm00001d048595		￬	-1.91618	0.000595954	0.0132928	x					x	x
Zm00001d023804		￬	-1.9166	0.000233921	0.00795129			x			x		x
Zm00001d044839		￬	-1.92881	0.0038136	0.0397247	x					x
Zm00001d011902		￬	-1.93296	7.8e-05	0.00427952	x					x		x
Zm00001d014918		￬	-1.93444	2.89e-06	0.000701361						x				Gómez-Anduro et al., 2011. Plant Mol Bio 77:159-183
Zm00001d028348		￬	-1.94198	0.000414227	0.0108218	x					x	x
Zm00001d038126		￬	-1.94503	2.81e-05	0.00260088						x	x
Zm00001d052683		￬	-1.95266	0.00379759	0.0396268	x					x
Zm00001d026160	gar2	￬	-1.95569	1.01e-05	0.00145823			x			x		x
Zm00001d048214		￬	-1.95608	0.000504784	0.012147		x				x
Zm00001d033514		￬	-1.95781	0.000599392	0.0133171	x					x
Zm00001d006137		￬	-1.97263	0.00055653	0.0127253	x	x				x
Zm00001d041827		￬	-1.97372	0.000328601	0.00952159						x
Zm00001d050768	crr7	￬	-1.98805	7.18e-08	8.15e-05		x		x		x
Zm00001d021255		￬	-1.98967	0.00317269	0.0360874	x					x
Zm00001d012325		￬	-1.99049	0.00399341	0.0409308	x	x		x		x
Zm00001d032115		￬	-1.99367	0.00127454	0.0207991	x			x		x
Zm00001d024105		￬	-1.99751	0.00108498	0.0190726						x			x
Zm00001d043244		￬	-2.0134	3.68e-05	0.00303784						x
Zm00001d032407		￬	-2.02419	1.25e-05	0.00162922	x		x			x
Zm00001d008898		￬	-2.03654	0.000490521	0.011945	x					x			x
Zm00001d011757		￬	-2.04859	0.00133743	0.02156				x		x
Zm00001d044608	asn2	￬	-2.0504	0.00188963	0.0265146	x					x		x
Zm00001d028025		￬	-2.05698	1.54e-05	0.00181805						x		x	x
Zm00001d051802		￬	-2.058	6.41e-05	0.00389945						x		x
Zm00001d010459		￬	-2.07447	0.00112529	0.0195058						x			x
Zm00001d031730		￬	-2.08064	1.43e-05	0.00171269						x
Zm00001d051936		￬	-2.09273	6.44e-05	0.00390528				x		x
Zm00001d016408		￬	-2.10685	0.000104414	0.00502961		x				x
Zm00001d022478		￬	-2.14106	0.000752672	0.0151775						x
Zm00001d012019		￬	-2.14552	1.17e-05	0.00157318						x
Zm00001d009899		￬	-2.1476	0.000184873	0.0069198	x		x			x			x
Zm00001d002989	ckx12	￬	-2.14994	6.07e-05	0.00384746		x				x
Zm00001d005174		￬	-2.15782	1.99e-06	0.000554162			x	x		x			x
Zm00001d006446	sm2	￬	-2.16349	0.00183875	0.0260325		x	x			x			x
Zm00001d007290		￬	-2.16397	1.23e-05	0.00161979	x	x	x			x	x
Zm00001d007269		￬	-2.1666	0.000204121	0.00733403	x					x		x
Zm00001d040836		￬	-2.21081	0.00368686	0.0390383						x
Zm00001d046134		￬	-2.22266	0.000201915	0.00728847		x				x	x
Zm00001d030253		￬	-2.24214	0.00113186	0.0195573	x		x			x		x
Zm00001d013561		￬	-2.2881	3.4e-05	0.00284649	x					x		x
Zm00001d038049		￬	-2.32412	0.00393219	0.0405098						x		x
Zm00001d027757	hsftf13	￬	-2.33554	0.000622806	0.0135975	x					x
Zm00001d053156		￬	-2.33779	0.000175456	0.00669992	x					x		x
Zm00001d038699		￬	-2.35331	0.00130809	0.0212195	x	x				x			x
Zm00001d006539		￬	-2.37143	0.0015209	0.0235072	x					x	x	x
Zm00001d049096		￬	-2.37709	1.67e-06	0.000530723		x				x	x
Zm00001d020691		￬	-2.38631	7.35e-06	0.00121915						x
Zm00001d038371	lac2	￬	-2.39781	3.91e-08	5.73e-05						x		x
Zm00001d044374		￬	-2.4022	1.7e-05	0.00191862	x					x			x
Zm00001d048669		￬	-2.42521	0.000104224	0.00502961			x			x			x
Zm00001d038476	expa5	￬	-2.43835	0.000170787	0.00659263						x
Zm00001d045423		￬	-2.43869	4.12e-05	0.00320552			x			x		x
Zm00001d032664	ckx6	￬	-2.47683	0.000441841	0.0112936	x					x
Zm00001d014762	srs4	￬	-2.48313	0.00324294	0.0364058	x					x		x
Zm00001d005279		￬	-2.50551	0.000261847	0.00842305	x			x		x
Zm00001d049683		￬	-2.50997	0.00141515	0.0224577	x					x			x
Zm00001d044579		￬	-2.52022	0.000336607	0.00963695						x
Zm00001d021634		￬	-2.58663	1.02e-05	0.00145823						x			x
Zm00001d052792		￬	-2.60136	1.19e-06	0.000410652						x	x
Zm00001d021455		￬	-2.6161	0.00175904	0.0254371	x					x
Zm00001d053234		￬	-2.71029	0.000898224	0.0171612						x	x		x
Zm00001d016031		￬	-2.73053	3.6e-06	0.000792221						x		x	x
Zm00001d030233		￬	-2.7335	0.000720021	0.0148247	x	x				x			x
Zm00001d030791		￬	-2.73499	0.00325213	0.036427	x					x
Zm00001d044541		￬	-2.74682	0.00368395	0.0390383	x		x			x		x
Zm00001d011903		￬	-2.75254	0.00283288	0.0337849	x					x
Zm00001d025247		￬	-2.78814	1.03e-06	0.000364324						x
Zm00001d011921		￬	-2.80491	0.000347557	0.00981183						x
Zm00001d004452		￬	-2.82691	7.68e-06	0.00125161						x
Zm00001d046834		￬	-2.83497	0.00347951	0.0378966	x	x	x	x		x
Zm00001d030305		￬	-2.85607	7e-05	0.00410126	x					x			x
Zm00001d003676		￬	-2.86494	1.85e-06	0.000534781		x				x		x	x
Zm00001d017510		￬	-2.87099	4.02e-06	0.000851432	x	x	x			x			x
Zm00001d010697		￬	-2.91087	5.25e-05	0.00359516	x	x	x	x		x			x
Zm00001d032495		￬	-2.9266	0.00242237	0.0305999						x		x
Zm00001d047705		￬	-2.96532	0.000984859	0.0180974	x			x		x		x
Zm00001d007310		￬	-2.96958	0.00207272	0.0280569	x					x		x
Zm00001d049625		￬	-3.00279	0.00362937	0.0388076						x	x
Zm00001d023450		￬	-3.09004	1.43e-06	0.000470811						x
Zm00001d026679		￬	-3.12929	0.00396744	0.0407252	x					x
Zm00001d021337		￬	-3.13704	0.00265205	0.0324188				x		x		x	x
Zm00001d025863		￬	-3.16895	0.00143968	0.0227178	x	x		x		x
Zm00001d004387		￬	-3.19214	0.000179593	0.00679387	x	x				x			x
Zm00001d048720		￬	-3.31319	5.93e-06	0.00108689						x
Zm00001d004626		￬	-3.38726	1.74e-06	0.000530723						x			x
Zm00001d026298		￬	-3.42561	0.00236885	0.0302977	x					x
Zm00001d017494		￬	-3.44555	0.00112323	0.0194914	x		x	x		x
Zm00001d039697	cyp24	￬	-3.48152	0.00258419	0.0318979	x	x				x			x
Zm00001d041842		￬	-3.64109	0.000693524	0.0145537	x	x		x		x		x
Zm00001d014971		￬	-3.70469	0.000244161	0.00821748		x		x		x
Zm00001d020887		￬	-3.7704	3.26e-05	0.00278374						x
Zm00001d043047	expa1	￬	-3.8235	2.89e-05	0.00263721						x
Zm00001d034357		￬	-3.94042	0.00427586	0.0427677	x	x		x		x			x
Zm00001d038696		￬	-4.38957	0.00103209	0.0185468	x			x		x			x
Zm00001d029859		￬	-9.0123	8.75e-07	0.000322538						x			x
Zm00001d033447	glb1	￪	5.63425	1.04e-07	9.79e-05					*✓				x	Liu, S et al. 1998. Plant Cell Rep 17:650-655
Zm00001d011132	prh18	￪	2.49722	1.74e-06	0.000530723					*✓					Wang, YG et al. 2018. Plant Mol Biol pp.doi: 10.1007/s11103-017-0692-7
Zm00001d038730	cbl4	￪	1.94492	1.27e-05	0.00163412				x	*✓					Wang et al., 2007. Plant Mol Biol. 65:733-46
Zm00001d033931	adh1	￪	1.69483	1.49e-05	0.00177194					*✓		x		x	Niu, X. et al., 2002. Plant Cell 10:2565-2575
Zm00001d040842	opr6	￬	-0.964821	0.00124932	0.0205721	x	x			*✓				x	Zhang, J, et al. 2005. Plant Mol Biol. 59:323-343
Zm00001d035560		￪	8.64611	0.000956993	0.0178045	x			x	✓				x
Zm00001d037730		￪	5.89331	3.09e-05	0.00271115		x	x	x	✓
Zm00001d005284		￪	4.11529	0.00357224	0.0385403	x	x			✓				x
Zm00001d023443		￪	3.99177	8.02e-09	3.67e-05					✓				x
Zm00001d006713		￪	3.44153	2.59e-05	0.0024762					✓
Zm00001d028574		￪	3.08756	1.84e-06	0.000534781					✓
Zm00001d022211		￪	2.7385	1.09e-05	0.00151278			x		✓
Zm00001d023800		￪	2.7113	2.28e-07	0.000144241					✓				x
Zm00001d051526		￪	2.70718	0.000360497	0.0100393	x	x	x		✓				x
Zm00001d051340		￪	2.56131	0.000117569	0.0053977	x		x	x	✓
Zm00001d051365		￪	2.20973	0.00241895	0.0305813	x		x		✓				x
Zm00001d029432		￪	2.18079	0.00186904	0.0263169	x	x			✓
Zm00001d019629		￪	2.06409	3.6e-06	0.000792221					✓
Zm00001d023700		￪	2.04141	0.000135549	0.00587146	x				✓
Zm00001d012382		￪	2.02876	0.000559902	0.0127882	x				✓
Zm00001d049660		￪	1.99075	1.11e-07	9.88e-05					✓
Zm00001d012867		￪	1.95713	0.000822938	0.0162367				x	✓
Zm00001d002799		￪	1.87979	0.00071788	0.0148129	x			x	✓
Zm00001d026182		￪	1.86823	7.53e-07	0.000296818					✓
Zm00001d000203		￪	1.7301	0.00226681	0.0295832	x	x			✓
Zm00001d023168		￪	1.63527	8.84e-05	0.00453406					✓
Zm00001d043536		￪	1.57784	7.12e-06	0.00119478		x	x	x	✓
Zm00001d046952		￪	1.57318	8.29e-06	0.00129943					✓
Zm00001d029806		￪	1.55037	0.00364828	0.0389132	x				✓		x
Zm00001d053269		￪	1.48866	0.00394407	0.040588	x				✓
Zm00001d026029		￪	1.37822	0.000103716	0.00502737	x	x			✓
Zm00001d041154		￪	1.3043	0.000150843	0.00618456		x			✓			x
Zm00001d026293		￪	1.28988	0.000466917	0.0116289	x				✓		x		x
Zm00001d034777		￪	1.21604	0.000950156	0.017748	x	x			✓
Zm00001d042275		￪	1.21198	0.000165499	0.00649451	x				✓
Zm00001d026028		￪	1.14884	0.0026253	0.0322586	x				✓
Zm00001d050728		￪	1.08028	0.000293888	0.00893056	x	x	x	x	✓				x
Zm00001d014625		￪	0.982162	9.33e-05	0.00470239		x			✓				x
Zm00001d012982		￪	0.958737	0.000220965	0.00773977	x				✓
Zm00001d002054		￬	-1.0279	0.00200173	0.0274495	x				✓
Zm00001d031535		￬	-1.04007	1.06e-05	0.00148501	x				✓				x
Zm00001d009415		￬	-1.0718	0.0011019	0.0192506	x				✓
Zm00001d031434		￬	-1.11107	0.000491293	0.011945	x				✓
Zm00001d038718	hb2	￬	-1.16911	0.000561961	0.0127961		x	x	x	✓				x
Zm00001d007869		￬	-1.2096	0.00239964	0.0305029	x				✓				x
Zm00001d037338		￬	-1.23332	0.0027549	0.0331055	x				✓			x
Zm00001d047921	lbd42	￬	-1.33399	0.00320268	0.0362367	x		x		✓
Zm00001d048737		￬	-1.4101	0.000948725	0.017748					✓		x
Zm00001d017495		￬	-1.49857	0.00100113	0.0182781	x	x			✓				x
Zm00001d010832		￬	-1.55035	0.00191292	0.0267488	x				✓				x
Zm00001d001126		￬	-1.6091	0.00147606	0.0230864	x				✓
Zm00001d047096		￬	-3.14814	0.000896764	0.0171564	x	x			✓				x
Zm00001d031428		￬	-3.60815	0.00288982	0.0342254	x				✓
Zm00001d010010		￪	7.82864	9.71e-05	0.00483283	x	x							x
Zm00001d003717		￪	7.69134	0.000292381	0.0089086	x	x							x
Zm00001d027587	bzr9	￪	6.31645	7.37e-05	0.00420799	x
Zm00001d027258		￪	5.75569	1.1e-07	9.88e-05			x
Zm00001d002473		￪	5.19821	0.000395449	0.0105725	x
Zm00001d013903		￪	5.07258	9.37e-09	3.67e-05
Zm00001d023945		￪	4.81522	0.000563343	0.0128157	x
Zm00001d045321		￪	4.66446	4.14e-06	0.000860978
Zm00001d022944		￪	4.64151	5.97e-06	0.00108689
Zm00001d052963		￪	4.42184	9.34e-08	9.79e-05
Zm00001d052064		￪	4.34006	1.23e-07	0.000104033
Zm00001d017648		￪	4.01742	0.000255851	0.00836129	x
Zm00001d025549		￪	4.00822	0.0050379	0.0473609	x		x	x					x
Zm00001d044078		￪	4.00759	1.46e-08	3.67e-05			x						x
Zm00001d035505		￪	3.76954	0.000107661	0.00509092		x							x
Zm00001d043730		￪	3.67209	4.16e-06	0.000860978		x
Zm00001d016846		￪	3.63377	0.00256409	0.0317124	x			x
Zm00001d002940		￪	3.46344	5.06e-07	0.00023672
Zm00001d025576		￪	3.46107	0.00443008	0.0438098	x								x
Zm00001d051877		￪	3.44944	0.000395026	0.0105725	x	x							x
Zm00001d020528		￪	3.39317	0.000512698	0.012265	x	x		x					x
Zm00001d018191		￪	3.28956	2.95e-05	0.00265934		x	x	x
Zm00001d053815		￪	3.24623	8.41e-06	0.0013044		x
Zm00001d013844		￪	3.22398	0.00126449	0.0207257	x		x	x
Zm00001d003760		￪	3.11171	4.45e-08	5.73e-05
Zm00001d019925		￪	3.0523	7.17e-05	0.00413706		x							x	Niu, X. et al., 2002. Plant Cell 10:2565-2575
Zm00001d022524		￪	3.01314	1.92e-06	0.00054547				x
Zm00001d003188		￪	2.96835	0.000162631	0.00643286	x
Zm00001d008872	ereb186	￪	2.91982	0.000170513	0.00659263		x		x					x
Zm00001d001311		￪	2.84899	0.00317231	0.0360874	x
Zm00001d003191		￪	2.71041	1.43e-05	0.00171269	x
Zm00001d010380		￪	2.69332	1.6e-07	0.00012941		x		x					x
Zm00001d000719		￪	2.69193	0.000541774	0.0126356	x
Zm00001d040120		￪	2.66437	0.000259762	0.00840362	x
Zm00001d011097		￪	2.65187	0.000348441	0.009827	x
Zm00001d022222		￪	2.62063	0.00409701	0.0415962	x
Zm00001d051424		￪	2.56911	4.61e-06	0.00093636
Zm00001d031878		￪	2.55325	0.00156762	0.0239895	x	x		x				x
Zm00001d048558		￪	2.53582	0.00113064	0.0195573	x								x
Zm00001d027332		￪	2.51938	1.24e-05	0.00162102								x
Zm00001d033231		￪	2.51684	1.28e-08	3.67e-05				x			x
Zm00001d015053		￪	2.48956	0.00127484	0.0207991	x		x	x
Zm00001d041964		￪	2.47607	0.000760159	0.0152959	x								x
Zm00001d031749		￪	2.45546	3.53e-07	0.000191025				x					x
Zm00001d008381		￪	2.42988	0.00224916	0.0294341	x								x
Zm00001d023404		￪	2.42428	4.99e-05	0.00349063			x						x
Zm00001d036768	myb158	￪	2.37334	6.58e-05	0.00396321	x
Zm00001d002899		￪	2.3387	3.88e-06	0.00084093
Zm00001d018288		￪	2.33003	0.000442366	0.0112952	x			x
Zm00001d017696		￪	2.28117	0.00172285	0.0250927	x
Zm00001d014055		￪	2.23121	3.19e-06	0.000741517
Zm00001d034482		￪	2.17565	0.000743214	0.0150082	x
Zm00001d021992		￪	2.15762	0.0020594	0.0279299	x
Zm00001d039735		￪	2.15418	0.000260828	0.0084189		x
Zm00001d000691		￪	2.14638	4.42e-08	5.73e-05										Vallabhaneni, R; Wurtzel, E. 2010. Arch Biochem Biophys. 504:112-7
Zm00001d002160		￪	2.14621	0.0032418	0.0364058	x	x	x	x
Zm00001d042898		￪	2.10922	2.07e-07	0.000136299			x
Zm00001d013281		￪	2.10545	0.000366203	0.0101282
Zm00001d025803		￪	2.05475	0.000248108	0.00829132	x
Zm00001d013212		￪	1.99867	1.2e-05	0.00159186
Zm00001d018699		￪	1.92573	1.84e-07	0.000135272		x	x	x
Zm00001d004506		￪	1.87155	0.000109781	0.00516306			x	x				x	x
Zm00001d011639	abi13	￪	1.8711	0.000120919	0.00545682	x			x					x
Zm00001d037769	c3h39	￪	1.86575	3.25e-05	0.00278374		x		x
Zm00001d008173		￪	1.82607	0.000116246	0.00536687
Zm00001d043601		￪	1.81042	6.58e-07	0.000278836				x					x
Zm00001d040979		￪	1.78497	3.48e-05	0.00289605									x
Zm00001d011202		￪	1.78409	2.61e-06	0.000649613
Zm00001d051048		￪	1.78249	0.000767542	0.0154008									x
Zm00001d036280		￪	1.76627	0.000833713	0.016347
Zm00001d002744		￪	1.75673	5.42e-05	0.00361514				x					x
Zm00001d004095	bhlh144	￪	1.7331	2.56e-05	0.00246818		x						x
Zm00001d039464		￪	1.72187	0.00289819	0.0342881	x								x
Zm00001d033592		￪	1.72126	0.00301609	0.0350614	x		x
Zm00001d043733		￪	1.71258	0.000540583	0.0126356									x
Zm00001d009503		￪	1.6975	1.22e-05	0.00161583										Huang, HH et al. 2016. Sci. Rep. Article number: 27590
Zm00001d000636		￪	1.67436	7.63e-05	0.00427463	x
Zm00001d044069		￪	1.64085	0.00252944	0.0314759	x
Zm00001d018857		￪	1.6385	0.000857003	0.0166883	x
Zm00001d049061		￪	1.62359	0.00122815	0.0204011	x
Zm00001d010653		￪	1.61489	0.000133553	0.00582742	x	x	x	x					x
Zm00001d029619		￪	1.60576	0.000467665	0.0116289	x							x
Zm00001d044950		￪	1.59045	0.000701214	0.0146393	x		x	x
Zm00001d012022		￪	1.58702	0.00032861	0.00952159	x
Zm00001d038304		￪	1.54726	9.31e-07	0.00033867								x
Zm00001d043734		￪	1.5452	2.59e-05	0.0024762		x
Zm00001d027455		￪	1.54182	9.5e-06	0.00140919		x						x	x
Zm00001d039148		￪	1.53496	2.93e-05	0.00265761
Zm00001d053293	cbl8	￪	1.52646	7.98e-05	0.00432032
Zm00001d015356		￪	1.52489	8.26e-05	0.00441094
Zm00001d024762		￪	1.50752	4.85e-06	0.000963084		x	x	x
Zm00001d009090		￪	1.49916	2.26e-06	0.000594105		x	x	x
Zm00001d019254		￪	1.49432	5.38e-05	0.00361514									x
Zm00001d003186		￪	1.46474	0.0035706	0.0385403	x	x
Zm00001d048393		￪	1.4493	5.77e-05	0.00370776									x
Zm00001d039241		￪	1.44582	0.00117528	0.0199301	x								x
Zm00001d019259		￪	1.44137	0.000506575	0.012147	x								x
Zm00001d026042		￪	1.44079	0.000142662	0.00596513	x								x
Zm00001d002992		￪	1.43281	5.14e-06	0.000978688								x
Zm00001d051496		￪	1.41536	0.000623641	0.0135975	x								x
Zm00001d002088		￪	1.38533	0.00305001	0.0352628	x
Zm00001d001582		￪	1.38449	0.00161078	0.0243052	x
Zm00001d034027		￪	1.38336	7.77e-05	0.00427881			x						x
Zm00001d033256		￪	1.38292	0.000578612	0.0130289	x	x	x	x
Zm00001d037768		￪	1.37964	5.46e-05	0.0036165		x	x	x
Zm00001d011126		￪	1.37774	0.00233751	0.0300907	x	x
Zm00001d041236		￪	1.36822	0.000106571	0.00507097
Zm00001d011429		￪	1.36725	0.00036626	0.0101282	x
Zm00001d029581		￪	1.36585	0.00173608	0.0252595	x	x		x					x
Zm00001d048680		￪	1.35778	0.000120976	0.00545682				x					x
Zm00001d017112	abi35	￪	1.33377	0.00131403	0.0212655	x
Zm00001d048709	bx1	￪	1.33234	0.00405877	0.041408	x								x
Zm00001d027041		￪	1.33076	0.00205113	0.027889	x
Zm00001d029163		￪	1.31472	0.0048356	0.0463343	x			x
Zm00001d012515		￪	1.30799	4.47e-05	0.00327627	x	x							x
Zm00001d003575		￪	1.30154	0.00207613	0.0280897	x		x						x
Zm00001d007865		￪	1.29326	0.000279073	0.00868511
Zm00001d015767		￪	1.29101	0.000262918	0.00844793	x	x
Zm00001d005037		￪	1.28137	0.00161049	0.0243052								x
Zm00001d032461	tls1	￪	1.27485	0.000141327	0.00596513				x			x		x
Zm00001d051659		￪	1.26414	0.0014722	0.0230571	x	x	x						x
Zm00001d026370		￪	1.2627	3.98e-05	0.00318421									x
Zm00001d000339		￪	1.26057	0.000290274	0.00889379	x
Zm00001d000967		￪	1.25211	4.98e-06	0.000976429
Zm00001d018965		￪	1.25106	0.000184197	0.00691774	x			x					x
Zm00001d031543		￪	1.24506	0.000980226	0.0180653	x
Zm00001d027021		￪	1.23101	9.88e-05	0.00488595	x
Zm00001d042899		￪	1.22689	6.13e-05	0.00384746
Zm00001d022456		￪	1.22606	0.00116435	0.0198885									x
Zm00001d000840		￪	1.22025	0.00184146	0.0260568	x
Zm00001d014463		￪	1.20828	0.00299225	0.0349447	x
Zm00001d029246		￪	1.20397	0.00113873	0.0196044	x			x
Zm00001d009399		￪	1.20338	0.00234793	0.0301469									x
Zm00001d007015		￪	1.19623	0.000539831	0.0126356	x
Zm00001d034713		￪	1.19143	7.73e-05	0.00427463	x
Zm00001d048962		￪	1.1891	0.0001742	0.00667558									x
Zm00001d049640		￪	1.18639	0.00119306	0.0200748				x					x
Zm00001d019256		￪	1.17025	0.000180043	0.00680183	x	x
Zm00001d046801		￪	1.16146	0.000666771	0.014185	x			x
Zm00001d026452		￪	1.1524	0.000200816	0.00725804
Zm00001d021490		￪	1.14125	0.000113214	0.00529423		x
Zm00001d006340		￪	1.13637	7.09e-05	0.00413706
Zm00001d006193		￪	1.12722	0.00546405	0.0499213		x	x	x
Zm00001d044045		￪	1.12363	4.3e-05	0.00322835
Zm00001d009826		￪	1.1229	0.000451541	0.0114066	x							x
Zm00001d046554		￪	1.11901	0.000185965	0.00694237	x								x
Zm00001d020306		￪	1.1123	0.00244881	0.0308379	x								x
Zm00001d037025		￪	1.11194	0.00175146	0.0254011	x	x	x	x
Zm00001d002521		￪	1.10434	0.000488343	0.0119366	x
Zm00001d002019		￪	1.10407	6.88e-05	0.00407458		x
Zm00001d041877		￪	1.1006	0.000504681	0.012147	x			x
Zm00001d045063		￪	1.08468	0.000160607	0.00643286	x								x
Zm00001d019994		￪	1.07709	0.00212509	0.0284669	x								x
Zm00001d048611		￪	1.0745	0.000717102	0.0148076	x			x
Zm00001d025322		￪	1.06334	0.00292571	0.0344575	x
Zm00001d015477		￪	1.05463	0.000279177	0.00868511		x	x	x
Zm00001d020345		￪	1.04556	0.000122475	0.00550693		x	x	x
Zm00001d016477		￪	1.03605	0.00372484	0.0392574	x								x
Zm00001d042090		￪	1.03582	0.00230139	0.0298287	x								x
Zm00001d031221		￪	1.02565	0.00478193	0.046022	x		x
Zm00001d002128		￪	1.02099	0.00274506	0.0330502	x		x	x
Zm00001d001774		￪	1.02074	0.000883363	0.0170211	x
Zm00001d026540	arftf29	￪	1.00766	0.00395143	0.0406143	x							x
Zm00001d029134		￪	0.997405	0.00186883	0.0263169	x	x	x	x					x
Zm00001d045119		￪	0.995532	0.0044149	0.0437054	x
Zm00001d044686		￪	0.988203	0.000460196	0.0115303
Zm00001d005898		￪	0.982783	0.00101028	0.0183742			x						x
Zm00001d022571		￪	0.98151	0.000529871	0.0125663										Busk, P et al. 1997. Plant J 11:1285-1295
Zm00001d052519		￪	0.974787	0.000178469	0.00677849	x								x
Zm00001d028331		￪	0.974717	0.00548471	0.0499237	x
Zm00001d015517		￪	0.972941	0.00395337	0.0406143	x			x					x
Zm00001d047621		￪	0.96655	0.00274484	0.0330502	x								x
Zm00001d001192		￪	0.965618	0.000506237	0.012147	x
Zm00001d005638		￪	0.962921	0.00251889	0.0313861	x	x		x				x	x
Zm00001d021577		￪	0.962828	0.000332315	0.0095915	x		x
Zm00001d010690		￪	0.961451	0.00173726	0.0252638	x	x
Zm00001d021690		￪	0.960729	0.00481313	0.0461776	x	x	x	x					x
Zm00001d019117		￪	0.960727	0.000117928	0.0053977	x							x
Zm00001d023327		￪	0.957191	0.00449794	0.0442035	x	x							x
Zm00001d012837		￬	-0.958177	0.0022249	0.0292651	x
Zm00001d039638		￬	-0.959302	0.000398418	0.010614	x	x	x	x				x	x
Zm00001d052241		￬	-0.965999	0.000283501	0.00877154	x
Zm00001d003848		￬	-0.971105	8.52e-05	0.00445546		x	x						x
Zm00001d010078		￬	-0.972944	0.00175567	0.0254013	x	x							x
Zm00001d042107		￬	-0.97487	0.00035045	0.00985428	x								x
Zm00001d018157	lhcb4	￬	-0.979219	0.00319475	0.0361888	x
Zm00001d047207		￬	-0.986604	0.000364019	0.0101018		x							x
Zm00001d037327	col10	￬	-0.994204	0.00326767	0.0365289	x
Zm00001d043872		￬	-0.998511	0.00178094	0.0256231	x
Zm00001d009560		￬	-0.999674	0.00437071	0.0433738	x		x	x					x
Zm00001d013277		￬	-1.01	0.004108	0.0416407	x
Zm00001d029190		￬	-1.0134	0.00374614	0.0393505	x			x					x
Zm00001d048256		￬	-1.0147	0.00227518	0.0296071	x	x
Zm00001d029325		￬	-1.01486	0.000436078	0.0111765				x					x
Zm00001d016470		￬	-1.01698	0.00139346	0.0222109	x
Zm00001d048053		￬	-1.01725	0.000429634	0.0111117	x		x
Zm00001d007035		￬	-1.02629	0.00412896	0.0417785	x
Zm00001d041119		￬	-1.03155	0.00199017	0.0273042	x
Zm00001d002514		￬	-1.03609	0.000245884	0.00825588
Zm00001d004232		￬	-1.03872	0.0050061	0.047187	x	x
Zm00001d035378		￬	-1.03947	0.00270575	0.0328206	x		x	x					x
Zm00001d027601		￬	-1.04791	0.0019612	0.0271329	x
Zm00001d047933		￬	-1.04829	0.00410431	0.0416181	x
Zm00001d043742		￬	-1.05061	0.000358838	0.0100108
Zm00001d021038		￬	-1.05157	0.00119744	0.0201014	x		x	x					x
Zm00001d000399		￬	-1.05158	0.000227315	0.00785547	x
Zm00001d043298		￬	-1.05552	0.00453879	0.044451	x
Zm00001d045738		￬	-1.05682	0.00210781	0.0284084	x	x
Zm00001d035561		￬	-1.06145	0.00548212	0.0499237	x	x
Zm00001d027882		￬	-1.06407	0.00261992	0.0322203	x
Zm00001d007012		￬	-1.0656	0.00212218	0.0284606	x
Zm00001d020774		￬	-1.06881	0.00324482	0.0364058	x
Zm00001d009510		￬	-1.07206	0.0022512	0.0294472	x	x							x
Zm00001d012935		￬	-1.07415	0.000911632	0.0173223	x		x					x
Zm00001d031161		￬	-1.08309	0.000489166	0.0119366	x								x
Zm00001d014495		￬	-1.08545	0.000728552	0.014903	x		x	x
Zm00001d040741		￬	-1.09282	0.000132398	0.00579689	x								x
Zm00001d041962		￬	-1.09398	0.000607632	0.01341	x		x
Zm00001d048593	rca1	￬	-1.09611	0.000950203	0.017748								x
Zm00001d003469		￬	-1.1003	0.00351574	0.0381739	x	x
Zm00001d049166		￬	-1.10479	0.000256391	0.00836129	x
Zm00001d007992		￬	-1.10557	0.00473203	0.045654	x	x
Zm00001d033181		￬	-1.10817	5.38e-05	0.00361514							x	x
Zm00001d008312		￬	-1.10847	0.0013162	0.0212783	x
Zm00001d048223		￬	-1.10945	0.000453949	0.011418	x		x	x					x
Zm00001d007108		￬	-1.11181	0.000483665	0.0118682	x
Zm00001d012276		￬	-1.11307	0.000738679	0.0149705	x								x
Zm00001d006045		￬	-1.12552	0.00105047	0.0187062	x	x	x	x					x
Zm00001d011468		￬	-1.12947	0.00325071	0.0364254	x
Zm00001d012165		￬	-1.13237	0.00031709	0.00934214	x								x
Zm00001d027320		￬	-1.13878	0.000608378	0.0134117									x
Zm00001d030101		￬	-1.14323	0.00140363	0.0223353	x							x
Zm00001d020736		￬	-1.14381	0.00427274	0.0427677	x	x	x	x
Zm00001d034776		￬	-1.15983	0.000564308	0.0128187	x
Zm00001d035629		￬	-1.1697	8.32e-05	0.0044247							x
Zm00001d047901		￬	-1.17373	0.000136179	0.00588975	x						x
Zm00001d031287		￬	-1.17819	0.000341613	0.0097214	x			x				x
Zm00001d020585		￬	-1.19053	0.00232551	0.0300179	x			x					x
Zm00001d020869		￬	-1.20596	0.000497565	0.0120144
Zm00001d039391		￬	-1.20622	0.000143514	0.00598791	x						x
Zm00001d029125		￬	-1.2067	0.00106066	0.0187964	x
Zm00001d029263		￬	-1.20746	0.000563726	0.0128157	x	x	x					x
Zm00001d028796		￬	-1.20879	8.3e-05	0.0044247	x	x						x
Zm00001d034875		￬	-1.21103	0.000425598	0.0110174	x
Zm00001d043615		￬	-1.21544	0.000733551	0.0149346	x						x		x
Zm00001d016085		￬	-1.21589	0.000897969	0.0171612	x		x						x
Zm00001d000402		￬	-1.21932	0.000603932	0.0133761
Zm00001d020017		￬	-1.22876	0.000692513	0.0145537	x			x				x	x
Zm00001d039251		￬	-1.23565	0.000161248	0.00643286	x						x		x
Zm00001d022965		￬	-1.23958	0.0013318	0.0214814
Zm00001d032570		￬	-1.24432	0.00454104	0.0444577	x
Zm00001d044826	nip2c	￬	-1.25331	0.000186911	0.00695024	x
Zm00001d027695		￬	-1.26024	0.00452297	0.0443534	x
Zm00001d030250		￬	-1.26204	0.000538507	0.0126356	x		x	x				x
Zm00001d042141		￬	-1.26922	0.000263965	0.00846059
Zm00001d039240		￬	-1.27723	0.000159482	0.00643286	x
Zm00001d034414		￬	-1.27929	0.000189995	0.00703727	x	x		x
Zm00001d042905		￬	-1.27953	0.00244422	0.0308073	x
Zm00001d023288		￬	-1.28738	0.00345867	0.0377773	x		x	x
Zm00001d033308		￬	-1.30315	3.11e-05	0.00271115		x							x
Zm00001d051364		￬	-1.31742	0.00247403	0.0310041	x		x
Zm00001d012353		￬	-1.32378	0.000160797	0.00643286	x								x
Zm00001d021967		￬	-1.32601	0.0033233	0.0368609	x
Zm00001d049081		￬	-1.3273	0.000291543	0.00890433		x	x						x
Zm00001d000320		￬	-1.32974	0.00365018	0.0389188	x	x
Zm00001d008209		￬	-1.36015	0.000178773	0.00678093
Zm00001d044242	bhlh25	￬	-1.36358	0.000695525	0.0145742	x		x	x				x
Zm00001d046995		￬	-1.3667	6.77e-05	0.00404877		x	x	x					x
Zm00001d021412		￬	-1.39362	0.000323115	0.00944122	x
Zm00001d049020	rtp1	￬	-1.39947	0.000962565	0.0178847				x
Zm00001d005821		￬	-1.40879	4.79e-05	0.0034066		x	x						x
Zm00001d034674		￬	-1.40955	0.00485982	0.0464565	x
Zm00001d041404		￬	-1.41551	9.35e-05	0.00470239
Zm00001d042087		￬	-1.41654	0.000222092	0.00776008	x			x					x
Zm00001d025382		￬	-1.41716	0.000548019	0.0126356	x	x		x
Zm00001d015636		￬	-1.41991	0.0012547	0.0206129	x								x
Zm00001d032973		￬	-1.42021	1.93e-05	0.00208692		x	x	x				x
Zm00001d033279		￬	-1.44024	5.56e-05	0.00366572									x
Zm00001d017638		￬	-1.44319	7.44e-05	0.0042219	x								x
Zm00001d003411		￬	-1.45269	0.000257555	0.0083694	x
Zm00001d021200		￬	-1.4532	1.76e-06	0.000530723				x				x
Zm00001d050889		￬	-1.4535	0.000639949	0.0138058			x
Zm00001d015744		￬	-1.47549	4.04e-05	0.00318421			x						x
Zm00001d028172		￬	-1.47642	0.00432925	0.0430681
Zm00001d048309	bhlh97	￬	-1.48335	0.0038894	0.0402738	x			x
Zm00001d034546		￬	-1.48619	0.00010509	0.00505358	x			x				x
Zm00001d035322		￬	-1.48904	0.000200529	0.00725804	x
Zm00001d025314		￬	-1.49292	0.000424571	0.0110109	x	x	x	x					x
Zm00001d017785		￬	-1.49368	0.000998805	0.0182473	x		x	x					x
Zm00001d032504		￬	-1.50388	9.77e-06	0.00143648
Zm00001d014852		￬	-1.51598	2.5e-05	0.00244078
Zm00001d051506		￬	-1.52805	0.00346006	0.0377773	x	x
Zm00001d041927		￬	-1.54324	4.24e-05	0.00322215			x	x					x
Zm00001d037644		￬	-1.54557	1.6e-05	0.00184725
Zm00001d029747		￬	-1.55868	0.000161704	0.00643286	x						x	x
Zm00001d006590		￬	-1.55919	0.00147256	0.0230571	x
Zm00001d014319		￬	-1.57065	0.000421558	0.0109428	x			x					x
Zm00001d041990		￬	-1.58244	0.00231842	0.0299673	x
Zm00001d039988		￬	-1.59244	6.32e-05	0.00388847	x
Zm00001d049221		￬	-1.62308	0.000860814	0.0167281	x
Zm00001d026431		￬	-1.62382	2.43e-05	0.00241466	x								x
Zm00001d045400		￬	-1.65478	0.00124398	0.0205523	x			x					x
Zm00001d006397		￬	-1.6608	7.79e-05	0.00427952	x							x	x
Zm00001d017438		￬	-1.67702	8.5e-05	0.00445546
Zm00001d006279		￬	-1.67826	4.63e-05	0.00333171
Zm00001d041701		￬	-1.70564	4.55e-05	0.00331145									x
Zm00001d003025	amt3	￬	-1.73509	0.00105009	0.0187062	x
Zm00001d024382		￬	-1.73569	1.67e-05	0.00189856		x	x
Zm00001d053225		￬	-1.74208	0.0030111	0.0350425		x		x
Zm00001d029636		￬	-1.74433	0.000142531	0.00596513	x							x
Zm00001d050180		￬	-1.75954	8.03e-05	0.00433715	x	x							x
Zm00001d039946		￬	-1.79533	1.71e-06	0.000530723		x	x	x
Zm00001d010233		￬	-1.82369	0.00260137	0.0320339	x								x
Zm00001d047189		￬	-1.8325	0.00233654	0.0300907	x
Zm00001d006285		￬	-1.8389	3.03e-05	0.00269292			x
Zm00001d049161		￬	-1.86355	0.00340711	0.0374584	x
Zm00001d047168		￬	-1.90969	0.00423267	0.0424795	x	x	x	x					x
Zm00001d023873		￬	-1.91598	9.62e-05	0.00481502
Zm00001d033671		￬	-1.98084	0.000205152	0.00735849	x
Zm00001d021454		￬	-1.98101	0.000889905	0.0170713	x
Zm00001d037209		￬	-1.98142	0.000193326	0.00711119	x	x
Zm00001d026859		￬	-2.00467	0.000395742	0.0105725
Zm00001d033319	iaa3	￬	-2.01319	5.61e-05	0.0036696		x
Zm00001d000360		￬	-2.01376	0.000284507	0.00878349	x	x	x	x					x
Zm00001d018433		￬	-2.03603	0.00183481	0.0260041	x
Zm00001d023869		￬	-2.07345	2.05e-05	0.00218503
Zm00001d022637		￬	-2.08655	8.27e-06	0.00129943		x		x
Zm00001d049657	gst26	￬	-2.09896	6.41e-06	0.00112802				x					x
Zm00001d016435		￬	-2.11589	1.95e-05	0.00209345									x
Zm00001d029913	expb6	￬	-2.12795	9.49e-05	0.00476446
Zm00001d002620		￬	-2.18331	0.000299028	0.00900723	x			x					x
Zm00001d036933		￬	-2.18999	0.00469071	0.0454369	x	x	x	x
Zm00001d019957		￬	-2.25248	0.000230298	0.00790086	x						x
Zm00001d021736		￬	-2.25643	0.000682431	0.0143955	x
Zm00001d003142		￬	-2.26414	6.5e-05	0.00393347			x	x
Zm00001d013143		￬	-2.30859	0.0041375	0.0418238	x
Zm00001d020383		￬	-2.33011	0.00120725	0.0201839	x
Zm00001d048643		￬	-2.33073	0.000140093	0.00595911
Zm00001d022192		￬	-2.47732	0.00180753	0.0259006	x			x					x
Zm00001d011406	hsftf25	￬	-2.56332	0.000297021	0.00897452
Zm00001d040837		￬	-2.56552	0.000929005	0.0175248
Zm00001d020195		￬	-2.58038	0.00366675	0.0389892	x
Zm00001d023117		￬	-2.60415	0.00054756	0.0126356		x
Zm00001d029906		￬	-2.62192	8.53e-05	0.00445546
Zm00001d003057		￬	-2.63053	0.00125211	0.0206061	x
Zm00001d015876		￬	-2.63546	0.00365782	0.0389564	x			x					x
Zm00001d035243		￬	-2.6538	1.48e-05	0.00176704				x
Zm00001d049113		￬	-2.68041	0.000736451	0.0149461		x							x
Zm00001d035343		￬	-2.77708	0.000277604	0.00866799	x			x					x
Zm00001d047090		￬	-2.77909	0.00028768	0.00883341		x
Zm00001d051223		￬	-2.81082	7.27e-05	0.00415914
Zm00001d001633		￬	-2.86136	0.00487068	0.0465136	x
Zm00001d027853		￬	-2.88398	0.00127192	0.0207991	x		x
Zm00001d001061		￬	-2.97915	0.000148897	0.0061492	x
Zm00001d052684		￬	-3.00739	3.1e-05	0.00271115				x					x
Zm00001d029903		￬	-3.23366	0.000163451	0.0064409
Zm00001d026537	hb122	￬	-3.26687	0.00149254	0.0232673	x
Zm00001d000533		￬	-3.34692	0.000261126	0.00841895	x
Zm00001d023870		￬	-3.41639	6.02e-07	0.000262715		x							x
Zm00001d047089		￬	-3.47191	2.53e-05	0.0024509	x	x	x	x						Wang, YG et al. 2018. Plant Mol Biol pp.doi: 10.1007/s11103-017-0692-7
Zm00001d023257		￬	-3.47536	0.000138066	0.00592329	x			x
Zm00001d029318		￬	-3.55363	0.00264708	0.0323899	x	x	x
Zm00001d048719		￬	-3.59916	1.4e-05	0.00170415
Zm00001d021017		￬	-3.62447	8.61e-05	0.00446452	x
Zm00001d029776		￬	-3.6312	0.000167278	0.00652819	x
Zm00001d004309		￬	-3.71237	1.37e-05	0.0016929									x
Zm00001d005742		￬	-3.87629	0.00530232	0.0490183	x		x	x
Zm00001d023872		￬	-3.91903	0.00137687	0.022032		x							x
Zm00001d047358		￬	-4.57467	0.000849685	0.0166142	x						x
Zm00001d015715		￬	-4.86818	6.42e-05	0.00389945									x
